# Supplementary material for: Association between access to social service resources and cardiometabolic risk factors: a machine learning and multilevel modeling analysis
Source: PubMed Central journal article supplement — BMJ Open. 2019 Mar 12;9(3):e025281. doi: 10.1136/bmjopen-2018-025281 (PMC6429845; doi:10.1136/bmjopen-2018-025281), 2019-03-12
Supplement: bmjopen-2018-025281.draft_revisions.pdf [file bmjopen-2018-025281.draft_revisions.pdf]

# BMJ Open

BMJ Open is committed to open peer review. As part of this commitment we make the peer review history of every article we publish publicly available.

When an article is published we post the peer reviewers' comments and the authors' responses online. We also post the versions of the paper that were used during peer review. These are the versions that the peer review comments apply to.

The versions of the paper that follow are the versions that were submitted during the peer review process. They are not the versions of record or the final published versions. They should not be cited or distributed as the published version of this manuscript.

BMJ Open is an open access journal and the full, final, typeset and author-corrected version of record of the manuscript is available on our site with no access controls, subscription charges or pay-per-view fees (<http://bmjopen.bmj.com>).

If you have any questions on BMJ Open's open peer review process please email [editorial.bmjopen@bmj.com](mailto:editorial.bmjopen@bmj.com)

# BMJ Open

## Association Between Access to Social Service Resources and Cardiometabolic Risk Factors: A Machine Learning and Multi-Level Modeling Analysis

|                               |                                                                                                                                                                                                                                                                               |
|-------------------------------|-------------------------------------------------------------------------------------------------------------------------------------------------------------------------------------------------------------------------------------------------------------------------------|
| Journal:                      | <i>BMJ Open</i>                                                                                                                                                                                                                                                               |
| Manuscript ID                 | bmjopen-2018-025281                                                                                                                                                                                                                                                           |
| Article Type:                 | Research                                                                                                                                                                                                                                                                      |
| Date Submitted by the Author: | 09-Jul-2018                                                                                                                                                                                                                                                                   |
| Complete List of Authors:     | Berkowitz, Seth; University of North Carolina at Chapel Hill School of Medicine, General Medicine and Clinical Epidemiology<br>Basu, Sanjay; Stanford University,<br>Venkataramani, Atheendar<br>Reznor, Gally<br>Fleegler, Eric; Children's Hospital Boston<br>Atlas, Steven |
| Keywords:                     | SOCIAL MEDICINE, PRIMARY CARE, Hypertension < CARDIOLOGY,<br>DIABETES & ENDOCRINOLOGY, Cardiac Epidemiology < CARDIOLOGY                                                                                                                                                      |
|                               |                                                                                                                                                                                                                                                                               |

SCHOLARONE™  
Manuscripts

Peer Review Only

1  
2  
3 **Association Between Access to Social Service Resources and Cardiometabolic**  
4  
5 **Risk Factors: A Machine Learning and Multi-Level Modeling Analysis**  
6  
7  
8  
9

10 Seth A. Berkowitz<sup>1-3</sup>, Sanjay Basu<sup>4,5</sup>, Atheendar Venkataramani<sup>6,7</sup>, Gally Reznor<sup>8</sup>, Eric  
11 W. Fleegler<sup>9,10</sup>, Steven J. Atlas<sup>8,9</sup>  
12  
13

14  
15  
16 <sup>1</sup> Division of General Medicine and Clinical Epidemiology, Department of Medicine,  
17 University of North Carolina School of Medicine, Chapel Hill, NC  
18

19  
20 <sup>2</sup> The Cecil G. Sheps Center for Health Services Research, University of North  
21 Carolina at Chapel Hill, Chapel Hill, NC  
22

23  
24  
25 <sup>3</sup> Center for Health Equity Research, Department of Social Medicine, University of  
26 North Carolina School of Medicine, Chapel Hill, NC  
27

28  
29  
30 <sup>4</sup> Center for Primary Care and Outcomes Research, Center for Population Health  
31 Sciences, Departments of Medicine and of Health Research and Policy, Stanford  
32 University, Palo Alto, California  
33

34  
35  
36 <sup>5</sup> Center for Primary Care, Harvard Medical School  
37

38  
39  
40 <sup>6</sup> Department of Medical Ethics and Health Policy, Perelman School of Medicine,  
41 University of Pennsylvania, Philadelphia.  
42

43  
44  
45 <sup>7</sup> Leonard Davis Institute of Health Economics, University of Pennsylvania,  
46 Philadelphia.  
47

48  
49  
50 <sup>8</sup> Division of General Internal Medicine, Massachusetts General Hospital, Boston,  
51 Massachusetts  
52

53  
54  
55 <sup>9</sup> Harvard Medical School, Boston, Massachusetts  
56  
57

1  
2  
3 <sup>10</sup> Division of Emergency Medicine, Boston Children's Hospital, Boston,  
4  
5  
6 Massachusetts

7  
8  
9  
10 Corresponding Author and Request for Reprints:

11  
12 Seth A. Berkowitz, MD MPH

13  
14 5034 Old Clinic Bldg

15  
16  
17 CB 7110

18  
19  
20 Chapel Hill, NC 27599

21  
22 Tel: 919-966-2276

23  
24  
25 seth\_berkowitz[at]med.unc.edu

26  
27 Tables: 3

28  
29 Figures: 1

30  
31 Word Count

32  
33 Abstract: 267/300

34  
35 Manuscript: 2991/4000

36  
37  
38 Running Title: Social Service Resources and Cardiometabolic Risk

39  
40  
41 Key Words: cardiovascular disease, food insecurity, health disparities,  
42  
43 socioeconomic status  
44  
45  
46  
47  
48  
49  
50  
51  
52  
53  
54  
55  
56  
57

1  
2  
3 **Objectives:** Interest in linking patients with unmet social needs to area-level  
4 resources, such as food pantries and employment centers, is growing. However,  
5  
6 whether the presence of these resources is associated with better health outcomes  
7  
8 is unclear. We sought to determine if area-level resources are associated with lower  
9  
10 levels of cardiometabolic risk factors.  
11  
12

13  
14  
15 **Design:** Cross-sectional.  
16

17 **Setting:** Data were collected in a primary care network in eastern Massachusetts in  
18  
19 2015.  
20

21  
22 **Participants and Primary and Secondary Outcome Measures:** 123,355  
23 participants were included. The primary outcome was body mass index (BMI). The  
24 secondary outcomes were systolic blood pressure (SBP), low density lipoprotein  
25 cholesterol (LDL), and hemoglobin a1c (HbA1c). All participants were included in  
26 BMI analyses. Participants with hypertension were included in SBP analyses.  
27  
28 Participants with an indication for cholesterol lowering were included in LDL  
29 analyses, and participants with diabetes mellitus were included in HbA1c analyses.  
30  
31 We used a random forest-based machine-learning algorithm to identify types of  
32 resources associated with study outcomes. We then tested the association of  
33  
34 selected resources with these outcomes, using multi-level models to account for  
35  
36 individual-level, clinic-level, and other area-level factors.  
37  
38

39  
40  
41 **Results:** Resources associated with lower BMI included more food resources (-0.08  
42  
43 kg/m<sup>2</sup> per additional resource, 95% Confidence Interval[CI] -0.13 to -0.03 kg/m<sup>2</sup>),  
44  
45 employment resources (-0.05 kg/m<sup>2</sup>, 95%CI -0.11 to -0.002 kg/m<sup>2</sup>), and nutrition  
46  
47  
48  
49  
50  
51  
52  
53  
54  
55  
56  
57

1  
2  
3 resources (-0.07 kg/m<sup>2</sup>, 95%CI -0.13 to -0.01 kg/m<sup>2</sup>). No area resources were  
4  
5 associated with differences in SBP, LDL, or HbA1c.  
6

7  
8 **Conclusions:** Access to specific local resources is associated with better BMI. Efforts  
9  
10 to link patients to area resources, and to improve the resources landscape within  
11  
12 communities, may help reduce BMI and improve population health.  
13  
14

15  
16  
17  
18  
19  
20  
21  
22  
23  
24  
25  
26  
27  
28  
29  
30  
31  
32  
33  
34  
35  
36  
37  
38  
39  
40  
41  
42  
43  
44  
45  
46  
47  
48  
49  
50  
51  
52  
53  
54  
55  
56  
57  
58  
59  
60

For peer review only

### Strengths and Limitations of the Study

- Strengths: Extensive individual and area-level data and
- Strengths: Innovative machine learning methods to overcome issues of collinearity and avoid multiple testing
- Strengths: Use of falsification tests
- Strengths: Use hierarchical linear modeling to account for data structure
- Limitations: Cross-sectional study

1  
2  
3 Cardiometabolic disease remains the most common cause of morbidity and  
4 mortality in the U.S.<sup>1</sup> Though better control of cardiometabolic risk factors could  
5 substantially reduce this morbidity and mortality, individuals with low  
6 socioeconomic status (SES) are less likely to achieve recommended goals.<sup>2</sup> Among  
7 the reasons for this are unmet basic needs, including such factors as food insecurity,  
8 housing instability, and lack of transportation. These unmet needs have been  
9 associated with higher levels of important cardiometabolic risk factors including  
10 increased body mass index (BMI), systolic blood pressure (SBP), low density  
11 lipoprotein cholesterol (LDL), and hemoglobin A1c (HbA1c), even after adjusting for  
12 factors like race/ethnicity, income, and education.<sup>3-8</sup>  
13  
14  
15  
16  
17  
18  
19  
20  
21  
22  
23  
24  
25  
26  
27  
28

29 Healthcare systems are increasingly interested in working with community partners  
30 to help link their patients to local resources, such as food pantries or housing  
31 agencies, to help meet these social needs.<sup>9-13</sup> This approach is exemplified by the  
32 Accountable Health Communities initiative from the Centers for Medicare &  
33 Medicaid Services, which involves screening for adverse social circumstances and  
34 linking those who screen positive to community resources.<sup>14</sup> However, there remain  
35 significant gaps in knowledge regarding such approaches. Critically, healthcare  
36 systems need to know which organizations to partner with, and potentially what  
37 types of resources to invest in.<sup>15</sup> This is especially true as the connection between  
38 resource type and need may not always be straightforward. For example, a food  
39 pantry could help alleviate food insecurity, but so could employment. Further, the  
40 relationship between specific health conditions and area-resources needs further  
41  
42  
43  
44  
45  
46  
47  
48  
49  
50  
51  
52  
53  
54  
55  
56  
57



1  
2  
3 study. Aspects of some conditions, such as HbA1c in those with diabetes mellitus,  
4  
5 may be more amenable to intensive clinical management. Others, such as BMI, may  
6  
7 have less effective treatment options within the healthcare system. Therefore, the  
8  
9 role that area resources play may differ depending on the intensity and impact of  
10  
11 concurrent clinical management. This distinction is important both for population  
12  
13 health, and for healthcare systems trying to decide where to invest in order meet  
14  
15 population health metrics that cannot easily be achieved through clinical care alone.  
16  
17  
18  
19  
20  
21

22 To help address these issues, and inform further interventions, we sought to study  
23  
24 associations between area-resources and cardiometabolic risk factors in a large  
25  
26 primary care network. Our goal was to understand which resource types were  
27  
28 associated with improved levels of BMI, SBP, LDL, and HbA1c, and to determine  
29  
30 whether area-resources had stronger associations with cardiometabolic risk factors  
31  
32 for conditions that are less amenable to clinical management.  
33  
34  
35  
36  
37

## 38 **Methods**

### 39 *Setting and Study Sample*

40  
41 Data for this study came from two primary sources: an asset mapping of community  
42  
43 resources, and electronic health records. The asset mapping came from the  
44  
45 HelpSteps database, a comprehensive asset mapping of area-resources in eastern  
46  
47 Massachusetts maintained by the Mayor's Health Line at the Boston Public Health  
48  
49 Commission and Boston Children's Hospital.<sup>16</sup> The clinical records came from a  
50  
51 primary care network in eastern Massachusetts, a network of 18 primary care  
52  
53  
54  
55  
56  
57

1  
2  
3 practices, including hospital-based, academic, and community health center sites. All  
4  
5 adult (age  $\geq 18$  years) primary care patients seen between January 1, 2012 and  
6  
7 December 31, 2015 were included. Data were current on December 31, 2015. The  
8  
9 most recent patient address was geocoded for the study. Patients without available  
10  
11 addresses were excluded—prior work has shown that only 0.15% of patients in this  
12  
13 cohort could not be geocoded.<sup>17</sup>  
14  
15

16  
17  
18  
19 The Partners Healthcare Human Research Committee exempted this analysis of  
20  
21 secondary data without patient contact from IRB review.  
22  
23

#### 24 25 26 *Patient and Public Involvement*

27  
28 The study research question was developed in reference to patient priorities  
29  
30 regarding the incorporation of neighborhood factors that promote health into  
31  
32 population health management. Patients were not involved in the design of the  
33  
34 study or in recruitment. We plan to disseminate study results via open-access  
35  
36 publication.  
37  
38  
39  
40  
41  
42

#### 43 44 *Area Resources*

45  
46 The HelpSteps database contains information on area-resources across 16 non-  
47  
48 mutually exclusive domains: health, housing, food (e.g. food pantries), employment,  
49  
50 violence, safety, substance abuse, mental health, education, parenting, nutrition (e.g.  
51  
52 nutrition counseling), after school, sexual health, transportation, diabetes, and care  
53  
54 transitions. Agencies providing multiple resources could be included in more than  
55  
56  
57

1  
2  
3 one domain. Area-resources were also geocoded, and then counts of resources for  
4 each domain were calculated at 4 geographic levels in roughly increasing order of  
5 size: census tract (using U.S. Census 2010 boundaries), ZIP code tabulation area  
6 (which we refer to throughout this paper as 'ZIP' level, owing to common use of the  
7 term, again using U.S. Census 2010 boundaries), 'neighborhood' (e.g. Allston,  
8 Roxbury, a designation based on Boston city planning that may better capture actual  
9 movement patterns), and county.  
10  
11  
12  
13  
14  
15  
16  
17  
18  
19  
20  
21

### 22 *Clinical Outcomes*

23  
24 To assess clinical outcomes, we calculated the mean of all values recorded in 2015  
25 from individual's electronic health record for the following measurements: body  
26 mass index (in kg/m<sup>2</sup>), systolic blood pressure (in mm Hg), low-density lipoprotein  
27 cholesterol (in mg/dL) and HbA1c (%). All values were obtained in the process of  
28 usual care.  
29  
30  
31  
32  
33  
34  
35  
36  
37

### 38 *Covariates*

39  
40 To account for possible confounding of the association between area resources and  
41 health outcomes, we collected the following variables from the electronic health  
42 record: age (years), gender (male or female), race/ethnicity (non-Hispanic white,  
43 non-Hispanic black, Hispanic, or Asian/other/multi), education (less than high  
44 school diploma, high school diploma [including GED], or greater than high school  
45 diploma), insurance (commercial, Medicare, Medicaid [including dual-eligibles], and  
46 uninsured/self-pay), number of clinic visits in 2015, primary language (English vs.  
47  
48  
49  
50  
51  
52  
53  
54  
55  
56  
57

1  
2  
3 other), connectedness to their primary care clinic using previously validated  
4  
5 algorithm<sup>18</sup>, and comorbidity (Charlson comorbidity score, and individual indicators  
6  
7 of depression, hypertension, coronary heart disease, osteoarthritis, and diabetes).  
8  
9  
10 To account for area-level differences from factors other than resources, we used  
11  
12 data from the U.S. Census' American Community Survey (5-year estimates 2010-  
13  
14 2015) and the USDA's Food Access Research Atlas: median household income,  
15  
16 percent living in poverty, 'food desert' status [low-income, low food access census  
17  
18 tract at 1/2 mile in urban areas and 10 miles in rural areas], unemployment rate,  
19  
20 proportion of the area population living in group quarters (e.g., those living in a  
21  
22 nursing facility unlikely to be exposed to area-level conditions), vehicle access, and  
23  
24 housing segregation.<sup>19,20</sup>  
25  
26  
27  
28  
29  
30

### 31 *Statistical analysis*

32  
33 In this study, we wanted to evaluate the relationship between many resources types  
34  
35 and cardiometabolic risk factors. A secondary goal of our study was to help  
36  
37 understand the relationship that specific geographic levels and resource types had  
38  
39 with clinical outcomes. To avoid multiple hypothesis testing that may lead to the  
40  
41 identification of spurious associations, we employed a machine learning technique  
42  
43 called variable selecting using random forest (VSURF) to screen through variables in  
44  
45 the derivation set.<sup>21,22</sup> This was done using a derivation dataset, which consisted of a  
46  
47 random partition of the entire dataset. Finally, we used multi-level modeling in the  
48  
49 test set (not used in the derivation stage) to test a small number of candidate  
50  
51 variables identified by VSURF as being most important to explaining variations in  
52  
53  
54  
55  
56  
57  
58  
59  
60

1  
2  
3 the derivation set. VSRUF is described in more detail in the technical appendix and  
4  
5 eFigure 1.  
6  
7  
8  
9

### 10 Multi-level modeling

11  
12 In the test dataset, we fit multi-level linear mixed models to test the association  
13  
14 between variables identified in the VSURF step and the outcome of interest. The BMI  
15  
16 model included all study participants. The SBP model included those with a  
17  
18 diagnosis of hypertension. The LDL model included those with common diagnoses  
19  
20 (hypertension, diabetes, coronary heart disease, cerebrovascular disease, congestive  
21  
22 heart failure) where LDL lowering is most beneficial. The HbA1c models included  
23  
24 those with a diagnosis of diabetes. The models used fixed effects to adjust for age,  
25  
26 gender, race/ethnicity, education, insurance, number of clinic visits, language, clinic  
27  
28 connectedness, comorbidity, and census tract level median household income,  
29  
30 poverty rates, 'food desert' status, unemployment, numbers living in group quarters,  
31  
32 vehicle access, and segregation. To account for clustering within practices, we  
33  
34 included a practice-level random effects term. To account for area-level clustering,  
35  
36 we used a ZIP-level random effects term. These were fit as crossed effects models  
37  
38 (i.e., we did not nest practices within ZIP codes) to allow for the fact that patients  
39  
40 are often seen in practices outside of their ZIP code of residence.  
41  
42  
43  
44  
45  
46  
47  
48  
49

### 50 Falsification tests

51  
52 To reduce the possibility that observed associations due to other unmeasured  
53  
54 characteristics of the area, rather than the specific area resource tested, we also  
55  
56  
57

1  
2  
3 conducted falsification analyses. To do this, we used the same modeling approach as  
4  
5 above, but tested for the association between area after school resources for  
6  
7 children and the outcome of interest. Our reasoning was that, since there was  
8  
9 unlikely to be any direct effect of after school resources on adult health, any  
10  
11 observed association would be due to unmeasured area-characteristics not  
12  
13 appropriately adjusted for in our model (such as high levels of civic engagement or  
14  
15 community organization, or other beneficial resources).  
16  
17  
18  
19  
20  
21

## 22 Variations in clinical management

23  
24 To help explore whether variations in the intensity of clinical management could  
25  
26 explain whether community resources were associated with health outcomes, we  
27  
28 also used the above modeling approach to test whether area resources were  
29  
30 associated with SBP in those *without* a diagnosis of hypertension. The primary care  
31  
32 network in the study has quality improvement program that emphasize the  
33  
34 importance of SBP, LDL, and HbA1c control in appropriate clinical populations.  
35  
36 Since BMI (in any population) and SBP control in those without a diagnosis of  
37  
38 hypertension are not included in these programs, we reasoned that area-resources  
39  
40 may be more important when clinicians are not intensively attempting to impact an  
41  
42 outcome. We focused on BMI and systolic blood pressure among those *without*  
43  
44 hypertension for this because BMI and SBP are routinely measured at all practice  
45  
46 visits for all patients.  
47  
48  
49  
50  
51  
52  
53  
54  
55  
56  
57

1  
2  
3 Because of its mechanistically plausible relationship with BMI, we used the  
4  
5 association between ZIP-level food resources and BMI as the primary outcome, with  
6  
7 secondary analyses being the associations between other VSURF selected area-  
8  
9 resources and clinical outcomes.  
10  
11  
12  
13  
14

### 15 Robustness checks

16  
17  
18  
19 In addition to the main analyses, we conducted a series of robustness checks that  
20  
21 examined whether different specifications of resources in the area (e.g. resources  
22  
23 per capita or resources per capita living in poverty) or different functional forms  
24  
25 (e.g. including polynomial terms or using splines) would alter the observed  
26  
27 associations between area-level resources and outcomes. We also conducted  
28  
29 analyses restricted to those with indicators of lower socioeconomic status (high  
30  
31 school diploma or lower educational attainment, living in a ZIP where > 15% of  
32  
33 individuals are in poverty) to ensure the results were applicable to those most likely  
34  
35 to utilize the resources studied.  
36  
37  
38  
39  
40  
41  
42

43 A p-value of < 0.05 was taken to indicate statistical significance. Analyses were  
44  
45 conducted in SAS Version 9.4 (Cary, NC), Stata 14 (College Station, TX), and R  
46  
47 version 3.3.4 (Vienna, Austria).  
48  
49  
50  
51

## 52 Results

1  
2  
3 Overall, 123,355 participants were included in the study. All participants were  
4  
5 eligible for the BMI analyses. Based on inclusion criteria, 43,509 were included in  
6  
7 the hypertension analyses, 46,940 were included in the LDL analyses, and 13,127  
8  
9 were included in the diabetes analyses. Demographic characteristics of the overall  
10  
11 sample are presented in Table 1. Demographic characteristics of the samples used in  
12  
13 the hypertension, LDL cholesterol, and diabetes analyses are presented in eTables 1-  
14  
15 3. Overall, the mean age was 52.4 (SD 16.9) years, the sample was 41.5% male,  
16  
17 82.1% non-Hispanic white, 5.8% non-Hispanic black, and 6.5% Hispanic. The  
18  
19 median number of years participants were followed in our network was 9  
20  
21 (intraquartile range (IQR): 3, 10), and the median number change of address per  
22  
23 year followed was 0.1 (IQR 0.1, 0.25), suggesting that participants resided at their  
24  
25 current address for the majority of their time in our network.  
26  
27  
28  
29  
30  
31  
32  
33

34 In general, individuals living in areas with more resources were less well-off (eTable  
35  
36 4). Maps depicting the distribution of the resources are presented in Figure 1 and  
37  
38 eFigures 2-3.  
39  
40  
41  
42

43 The mean BMI in the sample was 27.8 (SD 6.2) kg/m<sup>2</sup>. In the hypertension analyses,  
44  
45 the mean BP was 131.6 (SD 15.8) mmHg. In the LDL analyses, the mean LDL was  
46  
47 102.9 (SD 39.8) mg/dL, and in the diabetes analyses the mean HbA1c was 7.1 (SD  
48  
49 1.5)%.  
50  
51  
52  
53  
54  
55  
56  
57



1  
2  
3 Among geographic levels assessed, all resources selected were at the ZIP level  
4  
5 (Table 2). For the BMI analyses, the selected resources were ZIP level food  
6  
7 resources, ZIP level employment resources, and ZIP level nutrition resources. For  
8  
9 hypertension analyses, the selected resources were ZIP housing and ZIP nutrition  
10  
11 resources. For LDL analyses, the only selected resource was ZIP nutrition resources.  
12  
13 For diabetes analyses, the selected resources were ZIP mental health and ZIP  
14  
15 substance use resources.  
16  
17  
18  
19  
20  
21

22 For the BMI analyses, we tested the association between selected resources and  
23  
24 BMI, adjusting for the factors described in the statistical analysis section, and  
25  
26 accounting for clustering at the clinic and ZIP level with multi-level linear mixed  
27  
28 models. We found that resources associated with lower BMI included more food  
29  
30 resources (-0.08 kg/m<sup>2</sup> per additional resource, 95% Confidence Interval[CI] -0.13  
31  
32 to -0.03 kg/m<sup>2</sup>, p= .001), employment resources (-0.05 kg/m<sup>2</sup>, 95%CI -0.11 to -0.002  
33  
34 kg/m<sup>2</sup>, p=.04), and nutrition resources (-0.07 kg/m<sup>2</sup>, 95%CI -0.13 to -0.01 kg/m<sup>2</sup>,  
35  
36 p=.02) (full models for these and all robustness checks in eAppendix tables 5-16).  
37  
38 Table 3 compares mean BMI and obesity prevalence at selected numbers of  
39  
40 resources, adjusted for the other factors in the model. For example, the mean BMI in  
41  
42 neighborhoods with the median (0) number of food resources was 27.8 kg/m<sup>2</sup>,  
43  
44 while the mean BMI in neighborhoods in the 75<sup>th</sup> percentile (3 resources) was 27.5  
45  
46 kg/m<sup>2</sup>, and the 90<sup>th</sup> percentile (8 resources) was 27.1 kg/m<sup>2</sup>. Falsification tests  
47  
48 found the expected lack of association between afterschool resources and BMI  
49  
50 (p=.67).  
51  
52  
53  
54  
55  
56  
57

1  
2  
3  
4  
5 Robustness checks found that our results did not vary substantially with other  
6 specifications of area-level resources (eTables 5-7).  
7  
8  
9

10  
11  
12 In the hypertension analyses, neither housing resources (-0.05 mm Hg per  
13 additional resource, 95%CI -0.16 to 0.06 mm Hg,  $p=.41$ ) nor nutrition resources  
14 (0.01 mm Hg, 95%CI -0.13 to 0.16 mm Hg,  $p=.87$ ) were associated with systolic  
15 blood pressure after adjustment for individual level and area level characteristics. In  
16 LDL analyses, nutrition resources (0.10 mg/dL per additional resource, 95%CI -0.36  
17 to 0.55 mg/dL,  $p=.67$ ) were not associated with LDL cholesterol in adjusted models.  
18  
19 In diabetes analyses, neither substance abuse resources (-0.003% per additional  
20 resource, 95%CI -0.03 to 0.02%,  $p=.86$ ) nor mental health resources were  
21 associated with HbA1c (-0.003 %, 95%CI -0.03 to 0.02%,  $p=.76$ ).  
22  
23  
24  
25  
26  
27  
28  
29  
30  
31  
32  
33  
34  
35

36 In analyses looking at systolic blood pressure among those without a diagnosis of  
37 hypertension (i.e., those with no reason for clinical management of blood pressure),  
38 food resources were associated with lower systolic blood pressure in linear mixed  
39 models adjusted for the same factors as above (-0.08 mm Hg per additional  
40 resource, 95%CI -0.15 to -0.01 mm Hg,  $p=.03$ ). Mean systolic blood pressure was  
41 approximately 1 mm Hg lower at the 95<sup>th</sup> percentile (118.9 mm Hg) of food  
42 resources compared with the 50<sup>th</sup> percentile (119.8 mm Hg).  
43  
44  
45  
46  
47  
48  
49  
50  
51  
52  
53

54 Full models for all analyses are presented in eTables 8-16.  
55  
56  
57

## Discussion

This study assessed the relationship among area resources and cardiometabolic risk factors. We found that increasing numbers of food, employment, and nutrition resources was associated with lower BMI, and lower systolic blood pressure among those without hypertension. The magnitude of the difference was meaningful at the population level, as the 0.7 kg/m<sup>2</sup> difference in BMI between individuals in a well-resourced versus poorly resourced ZIP is similar to the 0.6 increase kg/m<sup>2</sup> in BMI in the overall U.S. population from 2006 to 2016.<sup>23</sup>

Conversely, we found that area resources were not associated with systolic blood pressure among those with hypertension, LDL cholesterol among those with an indication for LDL lowering, or hemoglobin A1c among those with diabetes. This suggests that the relationship between area resources and cardiometabolic risk factors may vary based on whether these factors are targets of intensive clinical management.

This study enhances our knowledge regarding the association of area-level factors and cardiometabolic risk factors. Prior studies have consistently found that adverse area-level factors, such as poverty, are associated with increased cardiometabolic risk, even when adjusting for individual-level factors, such as income.<sup>2,24-26</sup>

However, we did not know whether the presence of area resources that might

1  
2  
3 plausibly support health, such as food and nutrition resources, would be associated  
4  
5 with lower cardiometabolic risk.  
6  
7  
8  
9

10 The positive and negative associations between community resources and  
11  
12 cardiometabolic risk factors may have important public health implications. The  
13  
14 association between increased area resources and lower BMI suggests that efforts to  
15  
16 help link patients to community resources, and to help improve the resources  
17  
18 landscape within communities, may be a successful strategy for improving  
19  
20 population health, particularly for risk factors such as BMI where clinical  
21  
22 management may not be prioritized.<sup>10,11,27</sup> This is reinforced by the finding that SBP,  
23  
24 among those without hypertension, is lower in those living in areas with more  
25  
26 resources. Since SBP does not come under clinical management for those without  
27  
28 hypertension, this finding supports the potential for area resources to impact  
29  
30 population health, and is consistent with guidelines that recommend lifestyle, rather  
31  
32 than pharmacologic, approaches to pre-hypertension treatment.<sup>28</sup> Future work in  
33  
34 this area should investigate whether interventions that link individuals to area  
35  
36 resources show clinical benefits.  
37  
38  
39  
40  
41  
42  
43  
44

45 Our finding should be interpreted in light of several limitations. We did not have  
46  
47 access to data regarding use of the resources. However, we did employ a multi-level  
48  
49 modeling framework, consisting of both individual-level and area-level  
50  
51 measurement, to avoid issues of ecologic fallacy. Next, our study was cross-  
52  
53 sectional, and thus we cannot establish time-ordering between the exposure and the  
54  
55  
56  
57

1  
2  
3 cardiometabolic outcomes. However, we think it is less likely that lower BMI would  
4  
5 drive individuals into areas with more resources than vice versa, as areas with  
6  
7 higher resources tended to have other adverse features, such as lower income and  
8  
9 higher poverty, which are likely more salient considerations for those choosing  
10  
11 where to live. Finally, because of the relatively high residential stability within this  
12  
13 primary care population, we only examined the association between current area of  
14  
15 residence and the study outcomes. However, for those who do move, this could lead  
16  
17 to misclassification, which would tend to bias results to the null. These limitations  
18  
19 are balanced by several strengths. We had access to a detailed mapping of area  
20  
21 resources, along with detailed individual-level health information. Further, in  
22  
23 addition to the multi-level framework we used, the use of falsification tests  
24  
25 demonstrated that unadjusted area-level factors are not likely to explain the  
26  
27 observed results.  
28  
29  
30  
31  
32  
33  
34  
35

36 In summary, ZIP-level food, employment, and nutrition resources were associated  
37  
38 with BMI differences that were clinically meaningfully and statistically significant.  
39  
40 Further, the association between area resources and cardiometabolic risk factors  
41  
42 differed based on the specific risk factor. Investing in area resources and linkage  
43  
44 programs may be an important way to help reduce cardiometabolic risk for  
45  
46 vulnerable individuals, especially for situations not under intensive clinical  
47  
48 management.  
49  
50  
51  
52  
53  
54  
55  
56  
57

1  
2  
3  
4  
5  
6  
7  
8  
9  
10  
11  
12  
13  
14  
15  
16  
17  
18  
19  
20  
21  
22  
23  
24  
25  
26  
27  
28  
29  
30  
31  
32  
33  
34  
35  
36  
37  
38  
39  
40  
41  
42  
43  
44  
45  
46  
47  
48  
49  
50  
51  
52  
53  
54  
55  
56  
57  
58  
59  
60

For peer review only

## Acknowledgements

**Competing Interest Statement:** All authors declare they have nothing to disclose

**Guarantor:** Seth A. Berkowitz had full access to all of the data in the study and takes full responsibility for the work as a whole, including the study design, access to data, the integrity of the data, the accuracy of the data analysis, and the decision to submit and publish the manuscript.

**Funding Statement:** Research reported in this publication was supported by the National Institute for Diabetes and Digestive and Kidney Disease of the National Institutes of Health, and the National Institute on Minority Health and Health Disparities of the National Institutes of Health under Award Numbers DP2MD010478 (SB), U54MD010724 (SB), and K23DK109200 (SAB). The content is solely the responsibility of the authors and does not necessarily represent the official views of the National Institutes of Health.

**Author Contribution List:** SAB conducted the data analysis, wrote the first draft of the manuscript, and is the guarantor of the article. SAB, EWF, and SJA conceived of the study. GR assisted with data analysis. SB, AV, and GR contributed to interpretation of results and critical revision of the manuscript for intellectual context. All authors (SAB, SB, AV, GR, EF, and SJA) read and approved the final manuscript for submission.

**Data Sharing Statement:** Statistical code will be available concurrent with publication from <http://saberkowicz.web.unc.edu/statistical-code/>. Owing to privacy concerns, study data cannot be made publically available. Study Protocol: Not available.

1  
2  
3  
4  
5  
6  
7  
8  
9  
10  
11  
12  
13  
14  
15  
16  
17  
18  
19  
20  
21  
22  
23  
24  
25  
26  
27  
28  
29  
30  
31  
32  
33  
34  
35  
36  
37  
38  
39  
40  
41  
42  
43  
44  
45  
46  
47  
48  
49  
50  
51  
52  
53  
54  
55  
56  
57  
58  
59  
60

For peer review only



## References

1. Centers for Disease Control and Prevention. Deaths and Mortality. <https://www.cdc.gov/nchs/fastats/deaths.htm>. Published March 5, 2018. Accessed March 19, 2018.
2. Havranek EP, Mujahid MS, Barr DA, et al. Social Determinants of Risk and Outcomes for Cardiovascular Disease: A Scientific Statement From the American Heart Association. *Circulation*. 2015;132(9):873-898. doi:10.1161/CIR.0000000000000228
3. Berkowitz SA, Baggett TP, Wexler DJ, Huskey KW, Wee CC. Food insecurity and metabolic control among U.S. adults with diabetes. *Diabetes Care*. 2013;36(10):3093-3099. doi:10.2337/dc13-0570
4. Berkowitz SA, Meigs JB, DeWalt D, et al. Material need insecurities, control of diabetes mellitus, and use of health care resources: results of the Measuring Economic Insecurity in Diabetes study. *JAMA Intern Med*. 2015;175(2):257-265. doi:10.1001/jamainternmed.2014.6888
5. Berkowitz SA, Berkowitz TSZ, Meigs JB, Wexler DJ. Trends in food insecurity for adults with cardiometabolic disease in the United States: 2005-2012. *PloS One*. 2017;12(6):e0179172. doi:10.1371/journal.pone.0179172
6. Seligman HK, Laraia BA, Kushel MB. Food insecurity is associated with chronic disease among low-income NHANES participants. *J Nutr*. 2010;140(2):304-310. doi:10.3945/jn.109.112573
7. Baer TE, Scherer EA, Richmond TK, Fleegler EW, Hassan A. Food Insecurity, Weight Status, and Perceived Nutritional and Exercise Barriers in an Urban Youth Population. *Clin Pediatr (Phila)*. 2018;57(2):152-160. doi:10.1177/0009922817693301
8. Morales ME, Berkowitz SA. The Relationship Between Food Insecurity, Dietary Patterns, and Obesity. *Curr Nutr Rep*. 2016;5(1):54-60. doi:10.1007/s13668-016-0153-y
9. Hassan A, Blood EA, Pikcinglis A, et al. Youths' health-related social problems: concerns often overlooked during the medical visit. *J Adolesc Health Off Publ Soc Adolesc Med*. 2013;53(2):265-271. doi:10.1016/j.jadohealth.2013.02.024
10. Hassan A, Scherer EA, Pikcinglis A, et al. Improving Social Determinants of Health: Effectiveness of a Web-Based Intervention. *Am J Prev Med*. 2015;49(6):822-831. doi:10.1016/j.amepre.2015.04.023

11. Berkowitz SA, Hulberg AC, Standish S, Reznor G, Atlas SJ. Addressing Unmet Basic Resource Needs as Part of Chronic Cardiometabolic Disease Management. *JAMA Intern Med.* 2017;177(2):244-252. doi:10.1001/jamainternmed.2016.7691
12. Gottlieb LM, Wing H, Adler NE. A Systematic Review of Interventions on Patients' Social and Economic Needs. *Am J Prev Med.* July 2017. doi:10.1016/j.amepre.2017.05.011
13. Gottlieb LM, Hessler D, Long D, et al. Effects of Social Needs Screening and In-Person Service Navigation on Child Health: A Randomized Clinical Trial. *JAMA Pediatr.* 2016;170(11):e162521. doi:10.1001/jamapediatrics.2016.2521
14. Alley DE, Asomugha CN, Conway PH, Sanghavi DM. Accountable Health Communities--Addressing Social Needs through Medicare and Medicaid. *N Engl J Med.* 2016;374(1):8-11. doi:10.1056/NEJMp1512532
15. Bauer SR, Monuteaux MC, Fleegler EW. Geographic Disparities in Access to Agencies Providing Income-Related Social Services. *J Urban Health Bull N Y Acad Med.* 2015;92(5):853-863. doi:10.1007/s11524-015-9971-2
16. Fleegler E, J. Bottino C, Pikcilingis A, Baker B, Kistler E, Hassan A. Referral System Collaboration Between Public Health and Medical Systems: A Population Health Case Report. *Natl Acad Med Perspect Popul Health Case Rep.* May 2016.
17. Berkowitz SA, Traore CY, Singer DE, Atlas SJ. Evaluating area-based socioeconomic status indicators for monitoring disparities within health care systems: results from a primary care network. *Health Serv Res.* 2015;50(2):398-417. doi:10.1111/1475-6773.12229
18. Atlas SJ, Grant RW, Ferris TG, Chang Y, Barry MJ. Patient-physician connectedness and quality of primary care. *Ann Intern Med.* 2009;150(5):325-335.
19. USDA Food Access Research Atlas Documentation. <https://www.ers.usda.gov/data-products/food-access-research-atlas/documentation/>. Accessed August 11, 2017.
20. Napierala J, Denton N. Measuring Residential Segregation With the ACS: How the Margin of Error Affects the Dissimilarity Index. *Demography.* 2017;54(1):285-309. doi:10.1007/s13524-016-0545-z
21. Genuer R, Poggi J-M, Tuleau-Malot C. Variable Selection Using Random Forests. *Pattern Recogn Lett.* 2010;31(14):2225-2236. doi:10.1016/j.patrec.2010.03.014

- 1  
2  
3 22. Genuer R, Poggi J-M, Tuleau-Malot C. VSURF: An R Package for Variable  
4 Selection Using Random Forests. *R J*. 2015;7(2):19-33.  
5  
6  
7 23. Trends in adult body-mass index in 200 countries from 1975 to 2014: a pooled  
8 analysis of 1698 population-based measurement studies with 19.2 million  
9 participants. *The Lancet*. 2016;387(10026):1377-1396. doi:10.1016/S0140-  
10 6736(16)30054-X  
11  
12 24. Thomas AJ, Eberly LE, Davey Smith G, Neaton JD, Stamler J. Race/Ethnicity,  
13 Income, Major Risk Factors, and Cardiovascular Disease Mortality. *Am J Public*  
14 *Health*. 2005;95(8):1417-1423. doi:10.2105/AJPH.2004.048165  
15  
16 25. Diez Roux AV. Investigating Neighborhood and Area Effects on Health. *Am J*  
17 *Public Health*. 2001;91(11):1783-1789. doi:10.2105/AJPH.91.11.1783  
18  
19 26. Kelli HM, Hammadah M, Ahmed H, et al. Association Between Living in Food  
20 Deserts and Cardiovascular Risk. *Circ Cardiovasc Qual Outcomes*.  
21 2017;10(9):e003532. doi:10.1161/CIRCOUTCOMES.116.003532  
22  
23 27. Garg A, Toy S, Tripodis Y, Silverstein M, Freeman E. Addressing social  
24 determinants of health at well child care visits: a cluster RCT. *Pediatrics*.  
25 2015;135(2):e296-304. doi:10.1542/peds.2014-2888  
26  
27 28. Whelton PK, Carey RM, Aronow WS, et al. 2017  
28 ACC/AHA/AAPA/ABC/ACPM/AGS/APhA/ASH/ASPC/NMA/PCNA Guideline for  
29 the Prevention, Detection, Evaluation, and Management of High Blood Pressure  
30 in Adults: A Report of the American College of Cardiology/American Heart  
31 Association Task Force on Clinical Practice Guidelines. *Hypertension*. January  
32 2017:HYP.0000000000000065. doi:10.1161/HYP.0000000000000065  
33  
34  
35  
36  
37  
38  
39  
40  
41  
42  
43  
44  
45  
46  
47  
48  
49  
50  
51  
52  
53  
54  
55  
56  
57  
58  
59  
60

Table 1: Demographics of study sample

|                                       | N=123,355              |
|---------------------------------------|------------------------|
|                                       | Mean (SD) or n (%)     |
| Age                                   | 52.42 (16.89)          |
| Male                                  | 51665 (41.9)           |
| Race/ethnicity                        |                        |
| Asian/Multi/Other                     | 6880 (5.6)             |
| Non-Hispanic Black                    | 7203 (5.8)             |
| Hispanic                              | 8039 (6.5)             |
| Non-Hispanic White                    | 101233 (82.1)          |
| Education                             |                        |
| College or >                          | 56302 (45.6)           |
| High School Diploma                   | 36572 (29.6)           |
| Less than High School Diploma         | 18051 (14.6)           |
| Unknown/Declined                      | 12430 (10.1)           |
| Insurance                             |                        |
| Private                               | 75787 (61.4)           |
| Medicare and Medicaid                 | 8602 (7.0)             |
| Medicaid                              | 20934 (17.0)           |
| Medicare                              | 17911 (14.5)           |
| Self-pay                              | 121 (0.1)              |
| English is Primary Language           | 112720 (91.4)          |
| History of Hypertension               | 43509 (35.3)           |
| History of Coronary Heart Disease     | 9275 (7.5)             |
| History of Diabetes Mellitus          | 13127 (10.6)           |
| History of Depression                 | 10300 (8.3)            |
| History of Osteoarthritis             | 23707 (19.2)           |
| Charlson Comorbidity Score            | 1.72 (2.23)            |
| Clinic Visits                         | 6.57 (5.77)            |
| Clinic Connectedness                  |                        |
| Connected to specific physician       | 80345 (65.1)           |
| Connected to specific practice        | 34018 (27.6)           |
| Other                                 | 8992 (7.3)             |
| Lives in Urban Area                   | 91095 (96.4)           |
| ZIP-level Unemployment Rate, %        | 4.71 (1.60)            |
| ZIP-level Median Household Income, \$ | 82309.16<br>(31758.79) |
| ZIP-level Poverty Rate, %             | 8.70 (6.72)            |
| ZIP-level Segregation*                | 69.51 (21.05)          |
| Body Mass Index, kg/m <sup>2</sup>    | 27.84 (6.24)           |
| Systolic Blood Pressure, mm Hg        | 124.36 (14.96)         |

1  
2  
3  
4  
5  
6  
7  
8  
9  
10  
11  
12  
13  
14  
15  
16  
17  
18  
19  
20  
21  
22  
23  
24  
25  
26  
27  
28  
29  
30  
31  
32  
33  
34  
35  
36  
37  
38  
39  
40  
41  
42  
43  
44  
45  
46  
47  
48  
49  
50  
51  
52  
53  
54  
55  
56  
57  
58  
59  
60

|                        |                |
|------------------------|----------------|
| LDL cholesterol, mg/dL | 110.83 (39.95) |
| Hemoglobin A1c, %      | 5.94 (1.22)    |

\*Segregation index is a dissimilarity measure of the extent to which groups other than non-Hispanic whites are distributed like non-Hispanic whites. 0 represents complete integration and 100 represents complete segregation.

For peer review only

Table 2: Distribution of Selected Resources

| BMI Analyses            |         |                                |                                |                                |                                |                                |         |
|-------------------------|---------|--------------------------------|--------------------------------|--------------------------------|--------------------------------|--------------------------------|---------|
| Resource*               | Minimum | 25 <sup>th</sup><br>Percentile | 50 <sup>th</sup><br>Percentile | 75 <sup>th</sup><br>Percentile | 90 <sup>th</sup><br>Percentile | 95 <sup>th</sup><br>Percentile | Maximum |
| Food                    | 0       | 0                              | 0                              | 3                              | 8                              | 11                             | 27      |
| Employment              | 0       | 0                              | 0                              | 4                              | 13                             | 18                             | 33      |
| Nutrition               | 0       | 0                              | 0                              | 3                              | 6                              | 12                             | 21      |
| Hypertension Analyses   |         |                                |                                |                                |                                |                                |         |
| Housing                 | 0       | 0                              | 0                              | 2                              | 8                              | 8                              | 23      |
| Nutrition               | 0       | 0                              | 0                              | 3                              | 6                              | 12                             | 21      |
| LDL Analyses            |         |                                |                                |                                |                                |                                |         |
| Nutrition               | 0       | 0                              | 0                              | 3                              | 6                              | 12                             | 21      |
| Diabetes Analyses       |         |                                |                                |                                |                                |                                |         |
| Mental health           | 0       | 0                              | 0                              | 2                              | 5                              | 6                              | 21      |
| Substance use resources | 0       | 0                              | 1                              | 2                              | 5                              | 6                              | 23      |

\*All resources assessed at ZIP level

Table 3: Estimated BMI, in kg/m<sup>2</sup>, by resource level

| ZIP-level Food Resources       |       |
|--------------------------------|-------|
| 50 <sup>th</sup> Percentile    | 27.78 |
| 75 <sup>th</sup> Percentile    | 27.53 |
| 90 <sup>th</sup> Percentile    | 27.11 |
| 95 <sup>th</sup> Percentile    | 26.85 |
| ZIP-level Employment Resources |       |
| 50 <sup>th</sup> Percentile    | 27.78 |
| 75 <sup>th</sup> Percentile    | 27.56 |
| 90 <sup>th</sup> Percentile    | 27.07 |
| 95 <sup>th</sup> Percentile    | 26.80 |
| ZIP-level Nutrition Resources  |       |
| 50 <sup>th</sup> Percentile    | 27.75 |
| 75 <sup>th</sup> Percentile    | 27.54 |
| 90 <sup>th</sup> Percentile    | 27.32 |
| 95 <sup>th</sup> Percentile    | 26.89 |

Figure 1: Food Resource Density by ZIP

For peer review only



1  
2  
3  
4  
5  
6  
7  
8  
9  
10  
11  
12  
13  
14  
15  
16  
17  
18  
19  
20  
21  
22  
23  
24  
25  
26  
27  
28  
29  
30  
31  
32  
33  
34  
35  
36  
37  
38  
39  
40  
41  
42  
43  
44  
45  
46  
47  
48  
49  
50  
51  
52  
53  
54  
55  
56  
57  
58  
59  
60

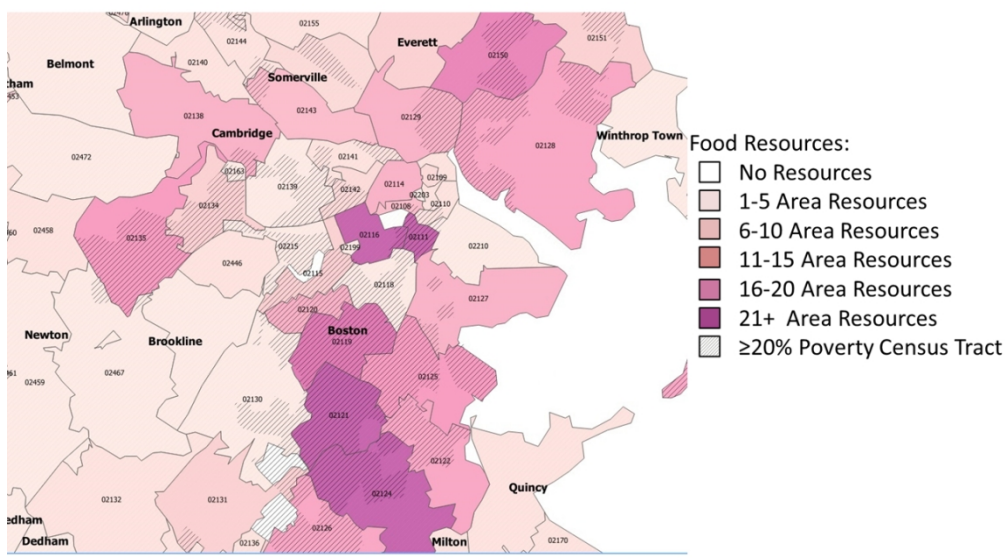

Figure 1

338x190mm (96 x 96 DPI)

1  
2  
3 eAppendix for Association Between Area Resources and Cardiometabolic Risk: A Machine  
4  
5 Learning and Multi-Level Modeling Analysis  
6  
7  
8  
9  
10  
11  
12  
13  
14  
15  
16  
17  
18  
19  
20  
21  
22  
23  
24  
25  
26  
27  
28  
29  
30  
31  
32  
33  
34  
35  
36  
37  
38  
39  
40  
41  
42  
43  
44  
45  
46  
47  
48  
49  
50  
51  
52  
53  
54  
55  
56  
57  
58  
59  
60

For peer review only

## Technical Appendix

### VSURF

The foundation of the VSURF technique is the decision tree (eFigure 1).<sup>21</sup> To construct a single decision tree, the procedure selects a random subset of variables from the total number of available variables, and selects a variable that best explains the variation in outcome of a bootstrap resample drawn from the derivation sample. For the next split, the variable that best explains the variation within each 'branch' of the tree created in the first split is selected. This process is continued until optimal separation is achieved. A 'forest' is grown by repeating this process 2000 times, each time randomly drawing a subset of variables and bootstrap resample of the derivation cohort. In the VSURF procedure, 50 forests of 2000 trees were grown in the initial 'thresholding' step, which focuses on removing irrelevant variables. Then, 25 forests of 2000 trees, using the remaining variables, were grown to select all variables associated with the response. Finally, 25 forests of 2000 trees were grown, selecting among the remaining variables to eliminate redundancy. After all three steps were completed, we selected up to the top three area resources, as indicated by variable importance factors in the final step, for hypothesis testing in the independent, 'testing' sample.

A major advantage of VSURF is that it directly addresses the correlation among variables, as the single best variable is selected at each split and thus the explanatory power is not divided amongst two or more related variables, as in linear regression. Secondly, VSURF allows one to screen through a number of candidate variables while preserving type I error rate, as statistical

1  
2  
3 significance testing is not used in the selection of variables, unlike p-value-based selection  
4  
5 algorithms.  
6  
7  
8  
9  
10  
11  
12  
13  
14  
15  
16  
17  
18  
19  
20  
21  
22  
23  
24  
25  
26  
27  
28  
29  
30  
31  
32  
33  
34  
35  
36  
37  
38  
39  
40  
41  
42  
43  
44  
45  
46  
47  
48  
49  
50  
51  
52  
53  
54  
55  
56  
57  
58  
59  
60

eFigure 1: Depiction of the Variable Selection Using Random Forest (VSURF) Method

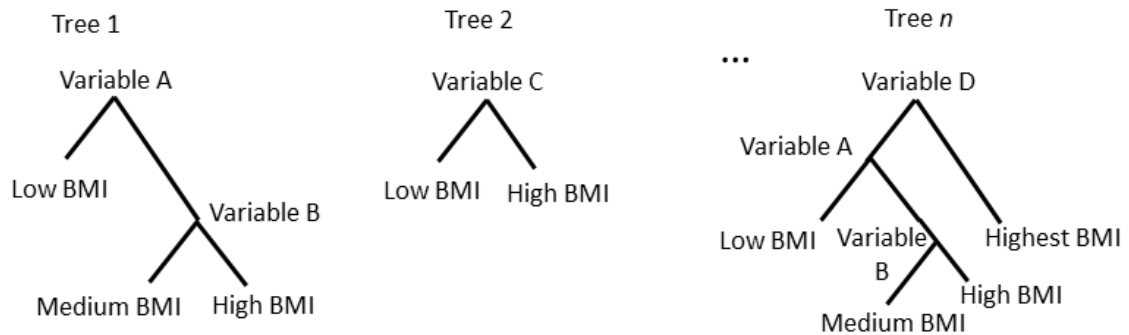

From a random subset of variables and a bootstrap resample of individuals in the derivation cohort, a decision tree that optimally splits the sample is created. This process is repeated in a second bootstrap resample with a second randomly selected subset of variables, and so on until  $n$  trees ( $n=2000$  in this study) are aggregated to create one forest. The forest-growing procedure is repeated 50 times. Then, using variable importance factors, which indicate the variables that are most useful in minimizing the error of predicted values in the 'out-of-bag' sample (those observations that, due to chance, were not selected in the bootstrap resample). After removing the least important variables, the entire process is repeated again, this time growing 25 forests of 2000 trees, in the 'interpretation' step, which focuses on selecting all variables associated with the response. Finally, to deal with correlations between variables, the process is repeated again, growing 25 more forests of 2000 trees, in the 'prediction' step, which focuses on removing redundancy in the final set of variables.

eFigure 2: Employment Resources by ZIP

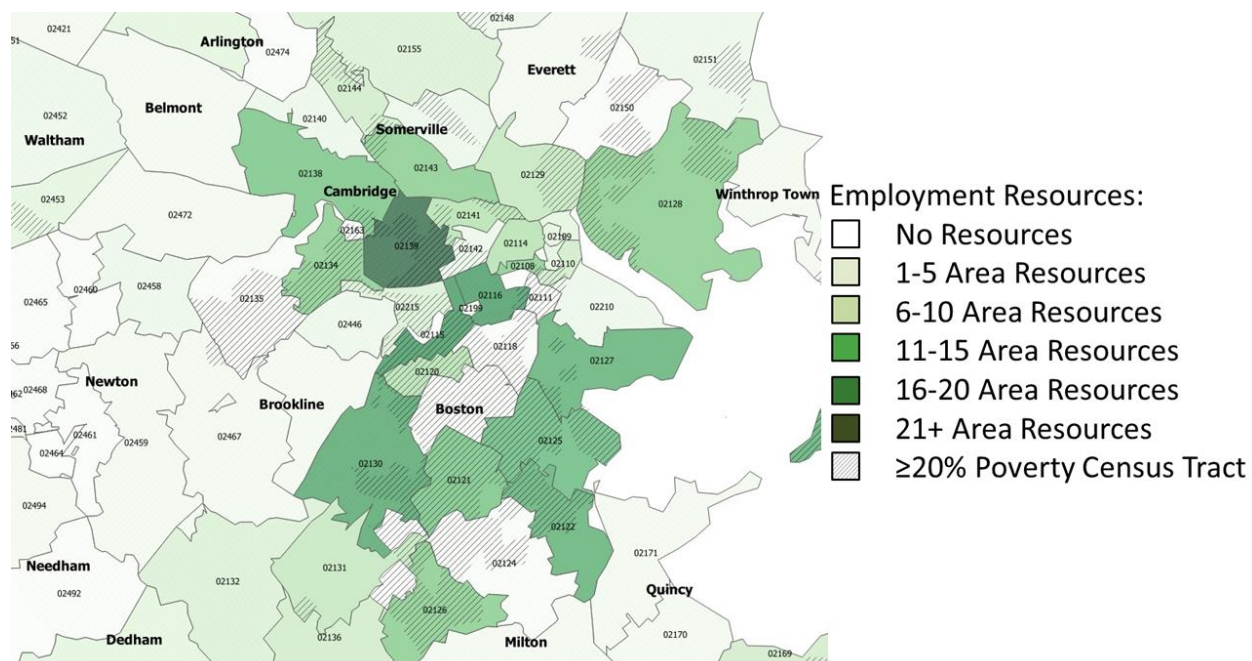

Review only

eFigure 3: Nutrition Resources by ZIP

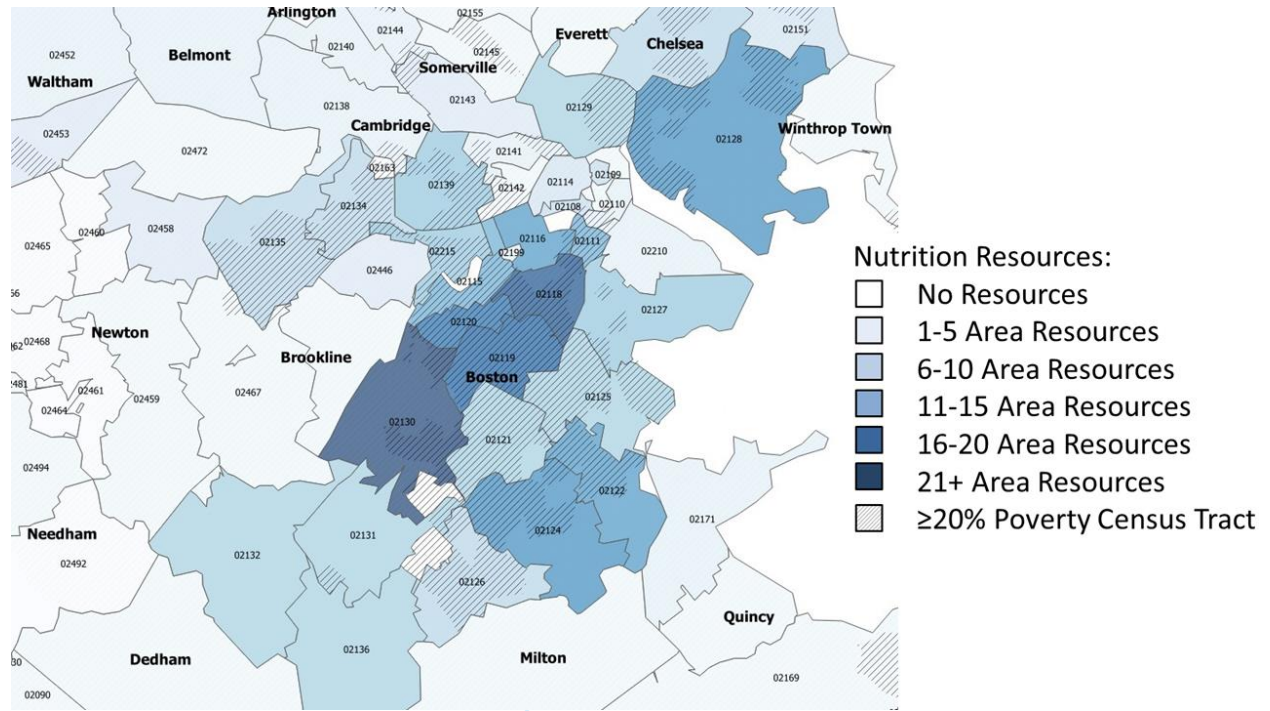

review only

eTable 1: Demographics for Hypertension Study Sample

|                                       | N=43,509            |
|---------------------------------------|---------------------|
|                                       | Mean (SD) or n (%)  |
| Age                                   | 64.67 (14.05)       |
| Male                                  | 21299 (49.0)        |
| Race/ethnicity                        |                     |
| Asian/Multi/Other                     | 1755 (4.0)          |
| Non-Hispanic Black                    | 3138 (7.2)          |
| Hispanic                              | 1983 (4.6)          |
| Non-Hispanic White                    | 36633 (84.2)        |
| Education                             |                     |
| College or >                          | 15660 (36.0)        |
| High School Diploma                   | 15900 (36.5)        |
| Less than High School Diploma         | 7422 (17.1)         |
| Unknown/Declined                      | 4527 (10.4)         |
| Insurance                             |                     |
| Private                               | 17256 (39.7)        |
| Medicare and Medicaid                 | 6200 (14.2)         |
| Medicaid                              | 6292 (14.5)         |
| Medicare                              | 13756 (31.6)        |
| Self-pay                              | 5 (0.0)             |
| English is Primary Language           | 39492 (90.8)        |
| History of Coronary Heart Disease     | 8373 (19.2)         |
| History of Diabetes Mellitus          | 11085 (25.5)        |
| History of Depression                 | 4745 (10.9)         |
| History of Osteoarthritis             | 14931 (34.3)        |
| Charlson Comorbidity Score            | 3.22 (2.57)         |
| Clinic Visits                         | 9.58 (6.77)         |
| Clinic Connectedness                  |                     |
| Connected to specific physician       | 36233 (83.3)        |
| Connected to specific practice        | 6978 (16.0)         |
| Other                                 | 298 (0.7)           |
| Lives in Urban Area                   | 32075 (96.4)        |
| ZIP-level Unemployment Rate, %        | 4.85 (1.63)         |
| ZIP-level Median Household Income, \$ | 80247.61 (31190.75) |
| ZIP-level Poverty Rate, %             | 8.67 (6.63)         |
| ZIP-level Segregation                 | 69.19 (21.92)       |
| Body Mass Index, kg/m <sup>2</sup>    | 29.68 (6.40)        |
| History of Obesity                    | 19314 (45.2)        |
| Systolic Blood Pressure, mm Hg        | 131.60 (15.75)      |



1  
2  
3  
4  
5  
6  
7  
8  
9  
10  
11  
12  
13  
14  
15  
16  
17  
18  
19  
20  
21  
22  
23  
24  
25  
26  
27  
28  
29  
30  
31  
32  
33  
34  
35  
36  
37  
38  
39  
40  
41  
42  
43  
44  
45  
46  
47  
48  
49  
50  
51  
52  
53  
54  
55  
56  
57  
58  
59  
60

|                        |                |
|------------------------|----------------|
| LDL cholesterol, mg/dL | 102.73 (39.82) |
| Hemoglobin A1c, %      | 6.25 (1.34)    |

For peer review only

eTable 2: Demographics for LDL Study Sample

|                                       | N=46940             |
|---------------------------------------|---------------------|
|                                       | Mean (SD) or n (%)  |
| Age                                   | 63.96 (14.33)       |
| Male                                  | 22916 (48.8)        |
| Race/ethnicity                        |                     |
| Asian/Multi/Other                     | 1971 (4.2)          |
| Non-Hispanic Black                    | 3401 (7.2)          |
| Hispanic                              | 2285 (4.9)          |
| Non-Hispanic White                    | 39283 (83.7)        |
| Education                             |                     |
| College or >                          | 16940 (36.1)        |
| High School Diploma                   | 17032 (36.3)        |
| Less than High School Diploma         | 8075 (17.2)         |
| Unknown/Declined                      | 4893 (10.4)         |
| Insurance                             |                     |
| Private                               | 18909 (40.3)        |
| Medicare and Medicaid                 | 6561 (14.0)         |
| Medicaid                              | 7169 (15.3)         |
| Medicare                              | 14296 (30.5)        |
| Self-pay                              | 5 (0.0)             |
| English is Primary Language           | 42468 (90.5)        |
| History of Hypertension               | 43509 (92.7)        |
| History of Coronary Heart Disease     | 9275 (19.8)         |
| History of Diabetes Mellitus          | 13127 (28.0)        |
| History of Depression                 | 5160 (11.0)         |
| History of Osteoarthritis             | 15695 (33.4)        |
| Charlson Comorbidity Score            | 3.14 (2.54)         |
| Clinic Visits                         | 9.46 (6.71)         |
| Clinic Connectedness                  |                     |
| Connected to specific physician       | 38851 (82.8)        |
| Connected to specific practice        | 7746 (16.5)         |
| Other                                 | 343 (0.7)           |
| Lives in Urban Area                   | 34532 (96.4)        |
| ZIP-level Unemployment Rate, %        | 4.86 (1.63)         |
| ZIP-level Median Household Income, \$ | 80079.26 (31173.63) |
| ZIP-level Poverty Rate, %             | 8.72 (6.64)         |
| ZIP-level Segregation                 | 68.98 (21.98)       |
| Body Mass Index, kg/m <sup>2</sup>    | 29.63 (6.42)        |
| History of Obesity                    | 20611 (44.7)        |
| Systolic Blood Pressure, mm Hg        | 130.88 (15.75)      |

1  
2  
3  
4  
5  
6  
7  
8  
9  
10  
11  
12  
13  
14  
15  
16  
17  
18  
19  
20  
21  
22  
23  
24  
25  
26  
27  
28  
29  
30  
31  
32  
33  
34  
35  
36  
37  
38  
39  
40  
41  
42  
43  
44  
45  
46  
47  
48  
49  
50  
51  
52  
53  
54  
55  
56  
57  
58  
59  
60

|                        |                |
|------------------------|----------------|
| LDL cholesterol, mg/dL | 102.85 (39.81) |
| Hemoglobin A1c, %      | 6.28 (1.36)    |

For peer review only

eTable 3: Demographics for Diabetes Study Sample

|                                       | N=13127             |
|---------------------------------------|---------------------|
|                                       | Mean (SD) or n (%)  |
| Age                                   | 64.12 (14.10)       |
| Male                                  | 6722 (51.2)         |
| Race/ethnicity                        |                     |
| Asian/Multi/Other                     | 729 (5.6)           |
| Non-Hispanic Black                    | 1415 (10.8)         |
| Hispanic                              | 986 (7.5)           |
| Non-Hispanic White                    | 9995 (76.1)         |
| Education                             |                     |
| College or >                          | 3691 (28.1)         |
| High School Diploma                   | 5115 (39.0)         |
| Less than High School Diploma         | 3085 (23.5)         |
| Unknown/Declined                      | 1236 (9.4)          |
| Insurance                             |                     |
| Private                               | 4247 (32.4)         |
| Medicare and Medicaid                 | 2609 (19.9)         |
| Medicaid                              | 2654 (20.2)         |
| Medicare                              | 3617 (27.6)         |
| Self-pay                              | 0 (0.0)             |
| English is Primary Language           | 11138 (84.8)        |
| History of Hypertension               | 11085 (84.4)        |
| History of Coronary Heart Disease     | 3316 (25.3)         |
| History of Diabetes Mellitus          | 13127 (100.0)       |
| History of Depression                 | 1685 (12.8)         |
| History of Osteoarthritis             | 4605 (35.1)         |
| Charlson Comorbidity Score            | 4.34 (2.94)         |
| Clinic Visits                         | 11.59 (7.52)        |
| Clinic Connectedness                  |                     |
| Connected to specific physician       | 10778 (82.1)        |
| Connected to specific practice        | 2234 (17.0)         |
| Other                                 | 115 (0.9)           |
| Lives in Urban Area                   | 9467 (97.4)         |
| ZIP-level Unemployment Rate, %        | 5.24 (1.67)         |
| ZIP-level Median Household Income, \$ | 72660.30 (28239.05) |
| ZIP-level Poverty Rate, %             | 10.19 (6.83)        |
| ZIP-level Segregation                 | 63.62 (23.80)       |
| Body Mass Index, kg/m <sup>2</sup>    | 31.48 (6.85)        |
| History of Obesity                    | 7427 (57.7)         |
| Systolic Blood Pressure, mm Hg        | 130.17 (16.09)      |

1  
2  
3  
4  
5  
6  
7  
8  
9  
10  
11  
12  
13  
14  
15  
16  
17  
18  
19  
20  
21  
22  
23  
24  
25  
26  
27  
28  
29  
30  
31  
32  
33  
34  
35  
36  
37  
38  
39  
40  
41  
42  
43  
44  
45  
46  
47  
48  
49  
50  
51  
52  
53  
54  
55  
56  
57  
58  
59  
60

|                        |               |
|------------------------|---------------|
| LDL cholesterol, mg/dL | 89.25 (37.45) |
| Hemoglobin A1c, %      | 7.08 (1.52)   |

For peer review only

eTable 4: Demographics of study sample by number of food resources in ZIP code tabulation area

|                                       | 0 food resources    | 1 to 7 food resources | ≥8 food resources   | p      |
|---------------------------------------|---------------------|-----------------------|---------------------|--------|
|                                       | N=65011             | N=42794               | N=13028             |        |
|                                       | Mean (SD) or n (%)  | Mean (SD) or n (%)    | Mean (SD) or n (%)  |        |
| Age                                   | 53.93 (16.13)       | 51.05 (17.69)         | 47.95 (16.92)       | <0.001 |
| Male                                  | 28050 (43.1)        | 17330 (40.5)          | 5163 (39.6)         | <0.001 |
| Race/ethnicity                        |                     |                       |                     | <0.001 |
| Asian/Multi/Other                     | 3559 (5.5)          | 2501 (5.8)            | 709 (5.4)           |        |
| Non-Hispanic Black                    | 2553 (3.9)          | 2710 (6.3)            | 1605 (12.3)         |        |
| Hispanic                              | 2306 (3.5)          | 2859 (6.7)            | 2707 (20.8)         |        |
| Non-Hispanic White                    | 56593 (87.1)        | 34724 (81.1)          | 8007 (61.5)         |        |
| Education                             |                     |                       |                     | <0.001 |
| College or >                          | 31782 (48.9)        | 18895 (44.2)          | 4837 (37.1)         |        |
| High School Diploma                   | 18400 (28.3)        | 13355 (31.2)          | 3767 (28.9)         |        |
| Less than High School Diploma         | 7373 (11.3)         | 6762 (15.8)           | 3449 (26.5)         |        |
| Unknown/Declined                      | 7456 (11.5)         | 3782 (8.8)            | 975 (7.5)           |        |
| Insurance                             |                     |                       |                     | <0.001 |
| Private                               | 44051 (67.8)        | 24062 (56.2)          | 6600 (50.7)         |        |
| Medicare and Medicaid                 | 3485 (5.4)          | 3551 (8.3)            | 1188 (9.1)          |        |
| Medicaid                              | 7319 (11.3)         | 9011 (21.1)           | 4075 (31.3)         |        |
| Medicare                              | 10128 (15.6)        | 6093 (14.2)           | 1149 (8.8)          |        |
| Self-pay                              | 28 (0.0)            | 77 (0.2)              | 16 (0.1)            |        |
| English is Primary Language           | 61559 (94.7)        | 38982 (91.1)          | 9923 (76.2)         | <0.001 |
| History of Hypertension               | 22195 (34.1)        | 15367 (35.9)          | 4342 (33.3)         | <0.001 |
| History of Coronary Heart Disease     | 4663 (7.2)          | 3385 (7.9)            | 817 (6.3)           | <0.001 |
| History of Cerebrovascular Disease    | 1628 (2.5)          | 1148 (2.7)            | 316 (2.4)           | 0.114  |
| History of Congestive Heart Failure   | 1941 (3.0)          | 1793 (4.2)            | 460 (3.5)           | <0.001 |
| History of Diabetes Mellitus          | 5735 (8.8)          | 4757 (11.1)           | 1735 (13.3)         | <0.001 |
| History of Depression                 | 4598 (7.1)          | 4024 (9.4)            | 1377 (10.6)         | <0.001 |
| History of Osteoarthritis             | 12179 (18.7)        | 8386 (19.6)           | 2331 (17.9)         | <0.001 |
| Charlson Comorbidity Score            | 1.70 (2.17)         | 1.72 (2.28)           | 1.56 (2.15)         | <0.001 |
| Clinic Visits                         | 5.93 (5.18)         | 7.14 (6.21)           | 7.19 (6.11)         | <0.001 |
| Clinic Connectedness                  |                     |                       |                     | <0.001 |
| Connected to specific physician       | 41292 (63.5)        | 28457 (66.5)          | 8593 (66.0)         |        |
| Connected to specific practice        | 14727 (22.7)        | 14337 (33.5)          | 4435 (34.0)         |        |
| Other                                 | 8992 (13.8)         | 0 (0.0)               | 0 (0.0)             |        |
| Lives in Urban Area                   | 52165 (94.3)        | 29291 (99.4)          | 7118 (99.9)         | <0.001 |
| ZIP-level Unemployment Rate, %        | 4.27 (1.41)         | 4.89 (1.51)           | 5.82 (1.83)         | <0.001 |
| ZIP-level Median Household Income, \$ | 96937.11 (34242.61) | 71648.83 (21514.21)   | 58606.22 (17651.59) | <0.001 |

|                                    |                |                |                |        |
|------------------------------------|----------------|----------------|----------------|--------|
| ZIP-level Poverty Rate, %          | 4.91 (4.58)    | 11.12 (6.26)   | 15.94 (5.58)   | <0.001 |
| ZIP-level Segregation              | 80.59 (15.85)  | 65.17 (15.29)  | 39.16 (20.13)  | <0.001 |
| Body Mass Index, kg/m <sup>2</sup> | 27.64 (6.03)   | 27.82 (6.34)   | 28.30 (6.63)   | <0.001 |
| History of Obesity                 | 18693 (30.1)   | 12765 (30.8)   | 4148 (33.2)    | <0.001 |
| Systolic Blood Pressure, mm Hg     | 124.47 (14.92) | 124.27 (15.03) | 123.44 (14.80) | <0.001 |
| LDL cholesterol, mg/dL             | 112.17 (42.48) | 109.92 (37.14) | 108.83 (35.34) | <0.001 |
| Hemoglobin A1c, %                  | 5.86 (1.12)    | 5.98 (1.25)    | 6.13 (1.43)    | <0.001 |

For peer review only

1  
2  
3 Robustness checks (eTable 5-7)  
4  
5  
6

7 Results from analyses, adjusted for the same factors as in main model presented in the manuscript,  
8 comparing the association of food resources and BMI with different specifications of ZIP-level food  
9 resources (count, count per capita, and count per capita living in poverty) show that the association  
10 between more area food resources and lower BMI is robust to different specifications of number of  
11 resources  
12

13  
14 eTable 5: Analyses comparing the association of food resources and BMI with different specifications  
15 of area-resources

|                                                                                                                                                           |                                                                                                                                                     |                                                                                                                                                                       |
|-----------------------------------------------------------------------------------------------------------------------------------------------------------|-----------------------------------------------------------------------------------------------------------------------------------------------------|-----------------------------------------------------------------------------------------------------------------------------------------------------------------------|
| 16 Estimated difference in BMI associated<br>17 with 1 additional ZIP-level resource (95%<br>18 CI), kg/m <sup>2</sup><br>19 (main model from manuscript) | 20 Estimated difference in<br>21 BMI associated with 1<br>22 additional ZIP-level<br>23 resource per 10000 people<br>24 (95% CI), kg/m <sup>2</sup> | 25 Estimated difference in BMI<br>26 associated with 1 additional<br>27 ZIP-level resource per 10000<br>28 people living in poverty<br>29 (95% CI), kg/m <sup>2</sup> |
| 30 -0.08 (-0.13 to -0.03)                                                                                                                                 | 31 -0.19 (-0.29 to -0.085)                                                                                                                          | 32 -0.02 (-0.03 to -0.01)                                                                                                                                             |

33 Analyses, adjusted for the same factors as in main model presented in the manuscript, including a  
34 quadratic and/or cubic term, or restricted cubic splines, to represent the number of ZIP-level resources  
35 resulted in worse model fit by Akaike information criterion and Bayes information criterion, suggesting  
36 that a linear approximation of the relationship between ZIP-level resources and the modeled outcome is  
37 reasonable.  
38

39 eTable 6: Model fit statistics from different specifications of ZIP-level food resources

| 40                              | 41 Akaike information criterion<br>42 (smaller represents better fit) | 43 Bayes information criterion<br>44 (smaller represents better fit) |
|---------------------------------|-----------------------------------------------------------------------|----------------------------------------------------------------------|
| 45 Linear term only             | 46 468646.6                                                           | 47 468640.6                                                          |
| 48 Linear plus quadratic        | 49 468656.5                                                           | 50 468650.5                                                          |
| 51 Linear, quadratic, and cubic | 52 468667.8                                                           | 53 468661.8                                                          |
| 54 Restricted cubic spline      | 55 468656.0                                                           | 56 468650.0                                                          |

57 Analyses, adjusted for the same factors as in main model presented in the manuscript, restricted to  
58 those with indicators of lower socioeconomic status show that the estimates for the association  
59 between additional ZIP-level food resources and BMI are slightly larger than in the overall population,  
60 which is consistent with the idea that these resources are beneficial for those with lower socioeconomic  
61 status

62 eTable 7: Analyses of association between ZIP-level food resources and body mass index, restricted to  
63 those with indicators of lower socioeconomic status  
64



| Estimated difference in BMI associated with 1 additional ZIP-level resource (95% CI), kg/m <sup>2</sup> (main model from manuscript) | Estimated difference in BMI associated with 1 additional ZIP-level resource (95% CI), restricted to those with high school diploma or lower educational attainment, kg/m <sup>2</sup> | Estimated difference in BMI associated with 1 additional ZIP-level resource (95% CI), restricted to those living in ZIP with > 15% living in poverty, kg/m <sup>2</sup> |
|--------------------------------------------------------------------------------------------------------------------------------------|---------------------------------------------------------------------------------------------------------------------------------------------------------------------------------------|-------------------------------------------------------------------------------------------------------------------------------------------------------------------------|
| -0.08 (-0.13 to -0.03)                                                                                                               | -0.09 (-0.15 to -0.04)                                                                                                                                                                | -0.11 (-0.17 to -0.06)                                                                                                                                                  |

For peer review only

eTable 8: Full models for association between ZIP-level food resources and body mass index

|                                   | Estimate  | Standard Error | p-value | Lower 95% Confidence Interval | Upper 95% Confidence Interval |
|-----------------------------------|-----------|----------------|---------|-------------------------------|-------------------------------|
| Intercept                         | 28.2196   | 1.1796         | <.0001  | 25.9071                       | 30.5320                       |
| ZIP-level food resources          | -0.08429  | 0.02512        | 0.0010  | -0.1340                       | -0.03460                      |
| ZIP-level afterschool resources   | 0.009484  | 0.02203        | 0.6674  | -0.03404                      | 0.05301                       |
| Age, years                        | -0.04950  | 0.002011       | <.0001  | -0.05344                      | -0.04556                      |
| Female                            | -1.3794   | 0.04395        | <.0001  | -1.4656                       | -1.2933                       |
| Race/ethnicity                    |           |                |         |                               |                               |
| Asian/Multi/Other                 | -2.5117   | 0.09328        | <.0001  | -2.6945                       | -2.3288                       |
| Non-Hispanic Black                | 0.9600    | 0.09753        | <.0001  | 0.7688                        | 1.1511                        |
| Hispanic                          | 0.7277    | 0.1081         | <.0001  | 0.5157                        | 0.9396                        |
| Non-Hispanic White                | reference | n/a            | n/a     | n/a                           | n/a                           |
| Education                         |           |                |         |                               |                               |
| College or >                      | -0.2793   | 0.07082        | <.0001  | -0.4181                       | -0.1404                       |
| High School Diploma               | 0.09622   | 0.07549        | 0.2025  | -0.05175                      | 0.2442                        |
| Less than High School Diploma     | 0.3871    | 0.09117        | <.0001  | 0.2084                        | 0.5658                        |
| Unknown/Declined                  | reference | n/a            | n/a     | n/a                           | n/a                           |
| Insurance                         |           |                |         |                               |                               |
| Private                           | 0.1890    | 1.0208         | 0.8531  | -1.8118                       | 2.1898                        |
| Medicare and Medicaid             | 0.06964   | 1.0240         | 0.9458  | -1.9374                       | 2.0767                        |
| Medicaid                          | 0.6961    | 1.0215         | 0.4956  | -1.3061                       | 2.6983                        |
| Medicaid                          | -0.4968   | 1.0230         | 0.6272  | -2.5019                       | 1.5083                        |
| Self-pay                          | reference | n/a            | n/a     | n/a                           | n/a                           |
| English is Primary Language       | 0.7128    | 0.09604        | <.0001  | 0.5246                        | 0.9011                        |
| History of Hypertension           | 2.7291    | 0.05550        | <.0001  | 2.6203                        | 2.8379                        |
| History of Coronary Heart Disease | -0.4141   | 0.08601        | <.0001  | -0.5827                       | -0.2455                       |
| History of Diabetes Mellitus      | 2.4217    | 0.07471        | <.0001  | 2.2752                        | 2.5681                        |

eTable 8: Full models for association between ZIP-level food resources and body mass index

|                                             | Estimate  | Standard Error | p-value | Lower 95% Confidence Interval | Upper 95% Confidence Interval |
|---------------------------------------------|-----------|----------------|---------|-------------------------------|-------------------------------|
| History of Depression                       | 0.5488    | 0.07350        | <.0001  | 0.4048                        | 0.6929                        |
| History of Osteoarthritis                   | 1.3188    | 0.05467        | <.0001  | 1.2116                        | 1.4260                        |
| Charlson Comorbidity Score                  | 0.06713   | 0.01268        | <.0001  | 0.04227                       | 0.09198                       |
| Clinic Visits                               | -0.00068  | 0.004383       | 0.8770  | -0.00927                      | 0.007911                      |
| Clinic Connectedness                        |           |                |         |                               |                               |
| Connected to specific physician             | 0.3184    | 0.05024        | <.0001  | 0.2200                        | 0.4169                        |
| Connected to specific practice              | reference | n/a            | n/a     | n/a                           | n/a                           |
| Lives in Urban Area                         | 0.2640    | 0.1580         | 0.0949  | -0.04583                      | 0.5739                        |
| Lives in Area with Low Physical Food Access | 0.09426   | 0.07794        | 0.2265  | -0.05851                      | 0.2470                        |
| Percentage of Area Living in Group Quarters | -0.00020  | 0.000060       | 0.0009  | -0.00032                      | -0.00008                      |
| Lives in Area with Low Vehicle Access       | 0.1189    | 0.05577        | 0.0331  | 0.009564                      | 0.2282                        |
| ZIP-level Unemployment Rate                 | 0.2608    | 0.03829        | <.0001  | 0.1855                        | 0.3361                        |
| ZIP-level Median Household Income           | -0.00001  | 1.936E-6       | <.0001  | -0.00002                      | -8.81E-6                      |
| ZIP-level Poverty Rate                      | -0.03254  | 0.01370        | 0.0183  | -0.05952                      | -0.00555                      |
| ZIP-level Segregation                       | 0.002536  | 0.003897       | 0.5158  | -0.00514                      | 0.01021                       |

eTable 9: Full models for association between ZIP-level employment resources and body mass index

|                                | Estimate | Standard Error | p-value | Lower 95% Confidence Interval | Upper 95% Confidence Interval |
|--------------------------------|----------|----------------|---------|-------------------------------|-------------------------------|
| Intercept                      | 28.1779  | 1.1847         | <.0001  | 25.8554                       | 30.5004                       |
| ZIP-level employment resources | -0.05415 | 0.02624        | 0.0407  | -0.1060                       | -0.00231                      |

eTable 9: Full models for association between ZIP-level employment resources and body mass index

|                                   | Estimate  | Standard Error | p-value | Lower 95% Confidence Interval | Upper 95% Confidence Interval |
|-----------------------------------|-----------|----------------|---------|-------------------------------|-------------------------------|
| ZIP-level afterschool resources   | 0.01083   | 0.03215        | 0.7366  | -0.05269                      | 0.07436                       |
| Age, years                        | -0.04951  | 0.002011       | <.0001  | -0.05345                      | -0.04557                      |
| Female                            | -1.3795   | 0.04395        | <.0001  | -1.4656                       | -1.2933                       |
| Race/ethnicity                    |           |                |         |                               |                               |
| Asian/Multi/Other                 | -2.5089   | 0.09330        | <.0001  | -2.6918                       | -2.3260                       |
| Non-Hispanic Black                | 0.9669    | 0.09755        | <.0001  | 0.7757                        | 1.1581                        |
| Hispanic                          | 0.7300    | 0.1081         | <.0001  | 0.5181                        | 0.9420                        |
| Non-Hispanic White                | reference | n/a            | n/a     | n/a                           | n/a                           |
| Education                         |           |                |         |                               |                               |
| College or >                      | -0.2787   | 0.07083        | <.0001  | -0.4175                       | -0.1399                       |
| High School Diploma               | 0.09646   | 0.07549        | 0.2013  | -0.05150                      | 0.2444                        |
| Less than High School Diploma     | 0.3880    | 0.09117        | <.0001  | 0.2093                        | 0.5667                        |
| Unknown/Declined                  | reference | n/a            | n/a     | n/a                           | n/a                           |
| Insurance                         |           |                |         |                               |                               |
| Private                           | 0.1930    | 1.0208         | 0.8500  | -1.8078                       | 2.1938                        |
| Medicare and Medicaid             | 0.07527   | 1.0240         | 0.9414  | -1.9318                       | 2.0823                        |
| Medicaid                          | 0.7010    | 1.0215         | 0.4926  | -1.3012                       | 2.7032                        |
| Medicaid                          | -0.4922   | 1.0230         | 0.6304  | -2.4973                       | 1.5128                        |
| Self-pay                          | reference | n/a            | n/a     | n/a                           | n/a                           |
| English is Primary Language       | 0.7126    | 0.09604        | <.0001  | 0.5243                        | 0.9008                        |
| History of Hypertension           | 2.7296    | 0.05550        | <.0001  | 2.6208                        | 2.8383                        |
| History of Coronary Heart Disease | -0.4138   | 0.08601        | <.0001  | -0.5824                       | -0.2452                       |
| History of Diabetes Mellitus      | 2.4215    | 0.07471        | <.0001  | 2.2751                        | 2.5680                        |
| History of Depression             | 0.5493    | 0.07350        | <.0001  | 0.4052                        | 0.6933                        |
| History of Osteoarthritis         | 1.3190    | 0.05467        | <.0001  | 1.2118                        | 1.4261                        |

eTable 9: Full models for association between ZIP-level employment resources and body mass index

|                                             | Estimate  | Standard Error | p-value | Lower 95% Confidence Interval | Upper 95% Confidence Interval |
|---------------------------------------------|-----------|----------------|---------|-------------------------------|-------------------------------|
| Charlson Comorbidity Score                  | 0.06713   | 0.01268        | <.0001  | 0.04227                       | 0.09198                       |
| Clinic Visits                               | -0.00069  | 0.004383       | 0.8744  | -0.00928                      | 0.007897                      |
| Clinic Connectedness                        |           |                |         |                               |                               |
| Connected to specific physician             | 0.3181    | 0.05024        | <.0001  | 0.2197                        | 0.4166                        |
| Connected to specific practice              | reference | n/a            | n/a     | n/a                           | n/a                           |
| Lives in Urban Area                         | 0.2569    | 0.1589         | 0.1059  | -0.05456                      | 0.5684                        |
| Lives in Area with Low Physical Food Access | 0.09945   | 0.07799        | 0.2023  | -0.05342                      | 0.2523                        |
| Percentage of Area Living in Group Quarters | -0.00019  | 0.000060       | 0.0013  | -0.00031                      | -0.00008                      |
| Lives in Area with Low Vehicle Access       | 0.1198    | 0.05586        | 0.0320  | 0.01027                       | 0.2293                        |
| ZIP-level Unemployment Rate                 | 0.2601    | 0.03946        | <.0001  | 0.1825                        | 0.3377                        |
| ZIP-level Median Household Income           | -0.00001  | 1.988E-6       | <.0001  | -0.00002                      | -8.84E-6                      |
| ZIP-level Poverty Rate                      | -0.03147  | 0.01401        | 0.0255  | -0.05905                      | -0.00389                      |
| ZIP-level Segregation                       | 0.003079  | 0.003968       | 0.4385  | -0.00473                      | 0.01089                       |

eTable 10: Full models for association between ZIP-level nutrition resources and body mass index

|                                   | Estimate  | Standard Error | p-value | Lower 95% Confidence Interval | Upper 95% Confidence Interval |
|-----------------------------------|-----------|----------------|---------|-------------------------------|-------------------------------|
| Intercept                         | 28.1161   | 1.1836         | <.0001  | 25.7958                       | 30.4364                       |
| ZIP-level nutrition resources     | -0.07146  | 0.03122        | 0.0234  | -0.1331                       | -0.00980                      |
| ZIP-level afterschool resources   | 0.002639  | 0.02650        | 0.9208  | -0.04967                      | 0.05495                       |
| Age, years                        | -0.04949  | 0.002011       | <.0001  | -0.05344                      | -0.04555                      |
| Female                            | -1.3792   | 0.04395        | <.0001  | -1.4654                       | -1.2931                       |
| Race/ethnicity                    |           |                |         |                               |                               |
| Asian/Multi/Other                 | -2.5116   | 0.09329        | <.0001  | -2.6944                       | -2.3287                       |
| Non-Hispanic Black                | 0.9650    | 0.09756        | <.0001  | 0.7738                        | 1.1562                        |
| Hispanic                          | 0.7272    | 0.1081         | <.0001  | 0.5152                        | 0.9392                        |
| Non-Hispanic White                | reference | n/a            | n/a     | n/a                           | n/a                           |
| Education                         |           |                |         |                               |                               |
| College or >                      | -0.2787   | 0.07082        | <.0001  | -0.4175                       | -0.1399                       |
| High School Diploma               | 0.09695   | 0.07549        | 0.1991  | -0.05102                      | 0.2449                        |
| Less than High School Diploma     | 0.3870    | 0.09117        | <.0001  | 0.2083                        | 0.5657                        |
| Unknown/Declined                  | reference | n/a            | n/a     | n/a                           | n/a                           |
| Insurance                         |           |                |         |                               |                               |
| Private                           | 0.1858    | 1.0208         | 0.8555  | -1.8150                       | 2.1866                        |
| Medicare and Medicaid             | 0.06642   | 1.0240         | 0.9483  | -1.9406                       | 2.0735                        |
| Medicaid                          | 0.6927    | 1.0215         | 0.4977  | -1.3095                       | 2.6948                        |
| Medicaid                          | -0.5000   | 1.0230         | 0.6250  | -2.5050                       | 1.5051                        |
| Self-pay                          | reference | n/a            | n/a     | n/a                           | n/a.                          |
| English is Primary Language       | 0.7143    | 0.09604        | <.0001  | 0.5261                        | 0.9026                        |
| History of Hypertension           | 2.7290    | 0.05550        | <.0001  | 2.6202                        | 2.8378                        |
| History of Coronary Heart Disease | -0.4139   | 0.08601        | <.0001  | -0.5825                       | -0.2453                       |
| History of Diabetes Mellitus      | 2.4211    | 0.07471        | <.0001  | 2.2747                        | 2.5676                        |

eTable 10: Full models for association between ZIP-level nutrition resources and body mass index

|                                             | Estimate  | Standard Error | p-value | Lower 95% Confidence Interval | Upper 95% Confidence Interval |
|---------------------------------------------|-----------|----------------|---------|-------------------------------|-------------------------------|
| History of Depression                       | 0.5484    | 0.07350        | <.0001  | 0.4044                        | 0.6925                        |
| History of Osteoarthritis                   | 1.3187    | 0.05467        | <.0001  | 1.2115                        | 1.4259                        |
| Charlson Comorbidity Score                  | 0.06712   | 0.01268        | <.0001  | 0.04227                       | 0.09197                       |
| Clinic Visits                               | -0.00069  | 0.004383       | 0.8750  | -0.00928                      | 0.007900                      |
| Clinic Connectedness                        |           |                |         |                               |                               |
| Connected to specific physician             | 0.3185    | 0.05024        | <.0001  | 0.2200                        | 0.4170                        |
| Connected to specific practice              | reference | n/a            | n/a     | n/a                           | n/a.                          |
| Lives in Urban Area                         | 0.2529    | 0.1588         | 0.1113  | -0.05838                      | 0.5642                        |
| Lives in Area with Low Physical Food Access | 0.1009    | 0.07792        | 0.1955  | -0.05185                      | 0.2536                        |
| Percentage of Area Living in Group Quarters | -0.00020  | 0.000060       | 0.0009  | -0.00032                      | -0.00008                      |
| Lives in Area with Low Vehicle Access       | 0.1176    | 0.05585        | 0.0352  | 0.008130                      | 0.2271                        |
| ZIP-level Unemployment Rate                 | 0.2684    | 0.03881        | <.0001  | 0.1921                        | 0.3447                        |
| ZIP-level Median Household Income           | -0.00001  | 1.972E-6       | <.0001  | -0.00002                      | -8.48E-6                      |
| ZIP-level Poverty Rate                      | -0.03270  | 0.01396        | 0.0199  | -0.06020                      | -0.00521                      |
| ZIP-level Segregation                       | 0.003113  | 0.003967       | 0.4332  | -0.00470                      | 0.01092                       |

eTable 11: Full models for association between ZIP-level housing resources and systolic blood pressure

|                                   | Estimate  | Standard Error | p-value | Lower 95% Confidence Interval | Upper 95% Confidence Interval |
|-----------------------------------|-----------|----------------|---------|-------------------------------|-------------------------------|
| Intercept                         | 115.70    | 11.1188        | <.0001  | 93.9116                       | 137.50                        |
| ZIP-level housing resources       | -0.04612  | 0.05585        | 0.4106  | -0.1567                       | 0.06446                       |
| ZIP-level afterschool resources   | -0.03286  | 0.04586        | 0.4755  | -0.1240                       | 0.05828                       |
| Age, years                        | 0.1521    | 0.009429       | <.0001  | 0.1337                        | 0.1706                        |
| Female                            | -0.6839   | 0.1930         | 0.0004  | -1.0622                       | -0.3055                       |
| Race/ethnicity                    |           |                |         |                               |                               |
| Asian/Multi/Other                 | -1.2014   | 0.4952         | 0.0153  | -2.1720                       | -0.2308                       |
| Non-Hispanic Black                | 2.8013    | 0.3960         | <.0001  | 2.0251                        | 3.5774                        |
| Hispanic                          | 0.5064    | 0.5619         | 0.3675  | -0.5950                       | 1.6078                        |
| Non-Hispanic White                | reference | n/a            | n/a     | n/a                           | n/a.                          |
| Education                         |           |                |         |                               |                               |
| College or >                      | 0.02428   | 0.3181         | 0.9392  | -0.5992                       | 0.6478                        |
| High School Diploma               | 0.1732    | 0.3236         | 0.5924  | -0.4610                       | 0.8074                        |
| Less than High School Diploma     | 0.6220    | 0.3914         | 0.1121  | -0.1452                       | 1.3893                        |
| Unknown/Declined                  | reference | n/a            | n/a     | n/a                           | n/a.                          |
| Insurance                         |           |                |         |                               |                               |
| Private                           | 8.3527    | 10.9765        | 0.4467  | -13.1616                      | 29.8671                       |
| Medicare and Medicaid             | 7.8728    | 10.9784        | 0.4733  | -13.6453                      | 29.3910                       |
| Medicaid                          | 8.5660    | 10.9772        | 0.4352  | -12.9499                      | 30.0818                       |
| Medicaid                          | 8.4728    | 10.9781        | 0.4402  | -13.0447                      | 29.9903                       |
| Self-pay                          | reference | n/a            | n/a     | n/a                           | n/a.                          |
| English is Primary Language       | -0.01463  | 0.4091         | 0.9715  | -0.8165                       | 0.7873                        |
| History of Coronary Heart Disease | -2.7190   | 0.2620         | <.0001  | -3.2325                       | -2.2055                       |
| History of Diabetes Mellitus      | 0.1079    | 0.2325         | 0.6426  | -0.3478                       | 0.5635                        |
| History of Depression             | -0.9568   | 0.3076         | 0.0019  | -1.5596                       | -0.3539                       |



eTable 11: Full models for association between ZIP-level housing resources and systolic blood pressure

|                                             | Estimate  | Standard Error | p-value | Lower 95% Confidence Interval | Upper 95% Confidence Interval |
|---------------------------------------------|-----------|----------------|---------|-------------------------------|-------------------------------|
| History of Osteoarthritis                   | -0.5000   | 0.2009         | 0.0128  | -0.8939                       | -0.1062                       |
| Charlson Comorbidity Score                  | -0.05959  | 0.04502        | 0.1856  | -0.1478                       | 0.02865                       |
| Clinic Visits                               | -0.02840  | 0.01601        | 0.0760  | -0.05978                      | 0.002975                      |
| Clinic Connectedness                        |           |                |         |                               |                               |
| Connected to specific physician             | -1.9594   | 0.2580         | <.0001  | -2.4651                       | -1.4538                       |
| Connected to specific practice              | reference | n/a            | n/a     | n/a                           | n/a.                          |
| Lives in Urban Area                         | 0.2234    | 0.5896         | 0.7049  | -0.9332                       | 1.3799                        |
| Lives in Area with Low Physical Food Access | -0.6380   | 0.3321         | 0.0548  | -1.2892                       | 0.01327                       |
| Percentage of Area Living in Group Quarters | -0.00025  | 0.000262       | 0.3352  | -0.00077                      | 0.000261                      |
| Lives in Area with Low Vehicle Access       | 0.2689    | 0.2251         | 0.2324  | -0.1725                       | 0.7102                        |
| ZIP-level Unemployment Rate                 | 0.1919    | 0.1055         | 0.0702  | -0.01598                      | 0.3998                        |
| ZIP-level Median Household Income           | 5.33E-7   | 4.993E-6       | 0.9151  | -9.33E-6                      | 0.000010                      |
| ZIP-level Poverty Rate                      | 0.003603  | 0.03442        | 0.9168  | -0.06460                      | 0.07180                       |
| ZIP-level Segregation                       | -0.00127  | 0.01007        | 0.8999  | -0.02117                      | 0.01863                       |

eTable 12: Full models for association between ZIP-level nutrition resources and systolic blood pressure

|                                   | Estimate  | Standard Error | p-value | Lower 95% Confidence Interval | Upper 95% Confidence Interval |
|-----------------------------------|-----------|----------------|---------|-------------------------------|-------------------------------|
| Intercept                         | 115.52    | 11.1170        | <.0001  | 93.7336                       | 137.31                        |
| ZIP-level nutrition resources     | 0.01167   | 0.07270        | 0.8728  | -0.1325                       | 0.1559                        |
| ZIP-level afterschool resources   | -0.06660  | 0.05852        | 0.2582  | -0.1829                       | 0.04971                       |
| Age, years                        | 0.1522    | 0.009429       | <.0001  | 0.1337                        | 0.1707                        |
| Female                            | -0.6823   | 0.1930         | 0.0004  | -1.0606                       | -0.3039                       |
| Race/ethnicity                    |           |                |         |                               |                               |
| Asian/Multi/Other                 | -1.2077   | 0.4952         | 0.0147  | -2.1782                       | -0.2371                       |
| Non-Hispanic Black                | 2.7981    | 0.3960         | <.0001  | 2.0218                        | 3.5744                        |
| Hispanic                          | 0.5101    | 0.5622         | 0.3643  | -0.5919                       | 1.6120                        |
| Non-Hispanic White                | reference | n/a            | n/a     | n/a                           | n/a.                          |
| education                         |           |                |         |                               |                               |
| College or >                      | 0.01868   | 0.3181         | 0.9532  | -0.6048                       | 0.6421                        |
| High School Diploma               | 0.1716    | 0.3236         | 0.5958  | -0.4626                       | 0.8059                        |
| Less than High School Diploma     | 0.6218    | 0.3915         | 0.1122  | -0.1455                       | 1.3891                        |
| Unknown/Declined                  | reference | n/a            | n/a     | n/a                           | n/a.                          |
| Insurance                         |           |                |         |                               |                               |
| Private                           | 8.3894    | 10.9765        | 0.4447  | -13.1251                      | 29.9038                       |
| Medicare and Medicaid             | 7.9053    | 10.9784        | 0.4715  | -13.6130                      | 29.4235                       |
| Medicaid                          | 8.6004    | 10.9773        | 0.4334  | -12.9155                      | 30.1163                       |
| Medicaid                          | 8.5087    | 10.9781        | 0.4383  | -13.0089                      | 30.0263                       |
| Self-pay                          | reference | n/a            | n/a     | n/a                           | n/a.                          |
| English is Primary Language       | -0.01592  | 0.4094         | 0.9690  | -0.8183                       | 0.7865                        |
| History of Coronary Heart Disease | -2.7161   | 0.2620         | <.0001  | -3.2295                       | -2.2026                       |
| History of Diabetes Mellitus      | 0.1087    | 0.2325         | 0.6399  | -0.3469                       | 0.5644                        |
| History of Depression             | -0.9576   | 0.3076         | 0.0019  | -1.5605                       | -0.3547                       |

eTable 12: Full models for association between ZIP-level nutrition resources and systolic blood pressure

|                                             | Estimate  | Standard Error | p-value | Lower 95% Confidence Interval | Upper 95% Confidence Interval |
|---------------------------------------------|-----------|----------------|---------|-------------------------------|-------------------------------|
| History of Osteoarthritis                   | -0.5002   | 0.2009         | 0.0128  | -0.8940                       | -0.1063                       |
| Charlson Comorbidity Score                  | -0.05975  | 0.04502        | 0.1845  | -0.1480                       | 0.02849                       |
| Clinic Visits                               | -0.02845  | 0.01601        | 0.0756  | -0.05982                      | 0.002932                      |
| Clinic Connectedness                        |           |                |         |                               |                               |
| Connected to specific physician             | -1.9589   | 0.2580         | <.0001  | -2.4645                       | -1.4532                       |
| Connected to specific practice              | reference | n/a            | n/a     | n/a                           | n/a.                          |
| Lives in Urban Area                         | 0.1603    | 0.5860         | 0.7845  | -0.9893                       | 1.3098                        |
| Lives in Area with Low Physical Food Access | -0.5789   | 0.3269         | 0.0768  | -1.2201                       | 0.06231                       |
| Percentage of Area Living in Group Quarters | -0.00025  | 0.000262       | 0.3343  | -0.00077                      | 0.000261                      |
| Lives in Area with Low Vehicle Access       | 0.2662    | 0.2251         | 0.2371  | -0.1752                       | 0.7076                        |
| ZIP-level Unemployment Rate                 | 0.2065    | 0.1045         | 0.0493  | 0.000612                      | 0.4124                        |
| ZIP-level Median Household Income           | 1.008E-6  | 4.966E-6       | 0.8395  | -8.8E-6                       | 0.000011                      |
| ZIP-level Poverty Rate                      | 0.003660  | 0.03453        | 0.9158  | -0.06473                      | 0.07205                       |
| ZIP-level Segregation                       | -0.00086  | 0.01007        | 0.9325  | -0.02075                      | 0.01904                       |

eTable 13: Full models for association between ZIP-level nutrition resources and low density lipoprotein cholesterol

|                                   | Estimate  | Standard Error | p-value | Lower 95% Confidence Interval | Upper 95% Confidence Interval |
|-----------------------------------|-----------|----------------|---------|-------------------------------|-------------------------------|
| Intercept                         | 103.76    | 38.1863        | 0.0066  | 28.9153                       | 178.61                        |
| ZIP-level nutrition resources     | 0.09859   | 0.2309         | 0.6699  | -0.3573                       | 0.5545                        |
| ZIP-level afterschool resources   | -0.00381  | 0.1854         | 0.9837  | -0.3706                       | 0.3630                        |
| Age, years                        | -0.3600   | 0.03023        | <.0001  | -0.4193                       | -0.3008                       |
| Female                            | 11.7432   | 0.5645         | <.0001  | 10.6367                       | 12.8497                       |
| Race/ethnicity                    | 0         | .              | .       | .                             | .                             |
| Asian/Multi/Other                 | -2.6927   | 1.4423         | 0.0619  | -5.5197                       | 0.1343                        |
| Non-Hispanic Black                | 0.7350    | 1.2077         | 0.5428  | -1.6323                       | 3.1022                        |
| Hispanic                          | 0.3468    | 1.7794         | 0.8455  | -3.1409                       | 3.8345                        |
| Non-Hispanic White                | reference | n/a            | n/a     | n/a                           | n/a.                          |
| Education                         |           |                |         |                               |                               |
| College or >                      | -0.1046   | 0.9328         | 0.9107  | -1.9329                       | 1.7237                        |
| High School Diploma               | -0.2598   | 0.9497         | 0.7844  | -2.1212                       | 1.6016                        |
| Less than High School Diploma     | -0.8496   | 1.1612         | 0.4644  | -3.1256                       | 1.4264                        |
| Unknown/Declined                  | reference | n/a            | n/a     | n/a                           | n/a.                          |
| Insurance                         |           |                |         |                               |                               |
| Private                           | 37.5148   | 37.8147        | 0.3212  | -36.6052                      | 111.63                        |
| Medicare and Medicaid             | 36.1970   | 37.8181        | 0.3385  | -37.9296                      | 110.32                        |
| Medicaid                          | 37.4872   | 37.8163        | 0.3216  | -36.6360                      | 111.61                        |
| Medicaid                          | 35.4040   | 37.8171        | 0.3492  | -38.7206                      | 109.53                        |
| Self-pay                          | reference | n/a            | n/a     | n/a                           | n/a.                          |
| English is Primary Language       | 0.6482    | 1.2438         | 0.6023  | -1.7897                       | 3.0861                        |
| History of Hypertension           | -4.3457   | 1.1538         | 0.0002  | -6.6072                       | -2.0842                       |
| History of Coronary Heart Disease | -14.8429  | 0.7275         | <.0001  | -16.2689                      | -13.4170                      |
| History of Diabetes Mellitus      | -16.1429  | 0.6619         | <.0001  | -17.4404                      | -14.8455                      |

eTable 13: Full models for association between ZIP-level nutrition resources and low density lipoprotein cholesterol

|                                             | Estimate  | Standard Error | p-value | Lower 95% Confidence Interval | Upper 95% Confidence Interval |
|---------------------------------------------|-----------|----------------|---------|-------------------------------|-------------------------------|
| History of Depression                       | 1.0979    | 0.9513         | 0.2485  | -0.7668                       | 2.9626                        |
| History of Osteoarthritis                   | 1.0828    | 0.5853         | 0.0643  | -0.06449                      | 2.2302                        |
| Charlson Comorbidity Score                  | -0.9716   | 0.1366         | <.0001  | -1.2394                       | -0.7038                       |
| Clinic Visits                               | -0.1983   | 0.04901        | <.0001  | -0.2944                       | -0.1023                       |
| Clinic Connectedness                        |           |                |         |                               |                               |
| Connected to specific physician             | -1.4526   | 0.8446         | 0.0855  | -3.1081                       | 0.2029                        |
| Connected to specific practice              | reference | n/a            | n/a     | n/a                           | n/a.                          |
| Lives in Urban Area                         | -0.4909   | 1.7202         | 0.7754  | -3.8649                       | 2.8831                        |
| Lives in Area with Low Physical Food Access | 0.2234    | 1.0117         | 0.8252  | -1.7604                       | 2.2073                        |
| Percentage of Area Living in Group Quarters | 0.001870  | 0.000788       | 0.0177  | 0.000325                      | 0.003414                      |
| Lives in Area with Low Vehicle Access       | -1.1732   | 0.6607         | 0.0759  | -2.4686                       | 0.1222                        |
| ZIP-level Unemployment Rate                 | 0.1519    | 0.3138         | 0.6287  | -0.4659                       | 0.7698                        |
| ZIP-level Median Household Income           | -0.00001  | 0.000015       | 0.3460  | -0.00004                      | 0.000015                      |
| ZIP-level Poverty Rate                      | -0.06528  | 0.1068         | 0.5418  | -0.2760                       | 0.1454                        |
| ZIP-level Segregation                       | -0.00654  | 0.03045        | 0.8301  | -0.06656                      | 0.05347                       |

eTable 14: Full models for association between ZIP-level substance abuse resources and hemoglobin A1c

|                                     | Estimate  | Standard Error | p-value | Lower 95% Confidence Interval | Upper 95% Confidence Interval |
|-------------------------------------|-----------|----------------|---------|-------------------------------|-------------------------------|
| Intercept                           | 7.0576    | 0.3362         | <.0001  | 6.3986                        | 7.7166                        |
| ZIP-level substance abuse resources | -0.00251  | 0.01460        | 0.8634  | -0.03113                      | 0.02611                       |
| ZIP-level afterschool resources     | 0.01106   | 0.007376       | 0.1336  | -0.00339                      | 0.02552                       |
| Age, years                          | -0.01059  | 0.001940       | <.0001  | -0.01440                      | -0.00679                      |
| Female                              | -0.1380   | 0.03843        | 0.0003  | -0.2133                       | -0.06263                      |
| Race/ethnicity                      |           |                |         |                               |                               |
| Asian/Multi/Other                   | -0.08503  | 0.08123        | 0.2952  | -0.2443                       | 0.07420                       |
| Non-Hispanic Black                  | 0.07012   | 0.06209        | 0.2588  | -0.05160                      | 0.1918                        |
| Hispanic                            | 0.06593   | 0.08944        | 0.4611  | -0.1094                       | 0.2413                        |
| Non-Hispanic White                  | reference | n/a n/a        | n/a     |                               | n/a.                          |
| Education                           |           |                |         |                               |                               |
| College or >                        | -0.1646   | 0.06820        | 0.0158  | -0.2983                       | -0.03090                      |
| High School Diploma                 | -0.01912  | 0.06665        | 0.7742  | -0.1498                       | 0.1116                        |
| Less than High School Diploma       | -0.07235  | 0.07528        | 0.3366  | -0.2200                       | 0.07529                       |
| Unknown/Declined                    | reference | n/a n/a        | n/a     |                               | n/a.                          |
| Insurance                           |           |                |         |                               |                               |
| Private                             | 0.2134    | 0.05612        | 0.0001  | 0.1034                        | 0.3234                        |
| Medicare and Medicaid               | 0.03459   | 0.05765        | 0.5486  | -0.07842                      | 0.1476                        |
| Medicaid                            | 0.3912    | 0.06811        | <.0001  | 0.2577                        | 0.5247                        |
| Medicaid                            | reference | n/a n/a        | n/a     |                               | n/a.                          |
| English is Primary Language         | -0.1599   | 0.06505        | 0.0140  | -0.2874                       | -0.03232                      |
| History of Hypertension             | 0.2365    | 0.05985        | <.0001  | 0.1191                        | 0.3538                        |
| History of Coronary Heart Disease   | -0.03921  | 0.04940        | 0.4274  | -0.1361                       | 0.05764                       |

eTable 14: Full models for association between ZIP-level substance abuse resources and hemoglobin A1c

|                                             | Estimate  | Standard Error     | p-value            | Lower 95% Confidence Interval | Upper 95% Confidence Interval |
|---------------------------------------------|-----------|--------------------|--------------------|-------------------------------|-------------------------------|
| History of Depression                       | -0.03705  | 0.05766            | 0.5205             | -0.1501                       | 0.07598                       |
| History of Osteoarthritis                   | -0.1499   | 0.04010            | 0.0002             | -0.2285                       | -0.07134                      |
| Charlson Comorbidity Score                  | 0.01588   | 0.008146           | 0.0513             | -0.00009                      | 0.03185                       |
| Clinic Visits                               | 0.006502  | 0.002846           | 0.0224             | 0.000922                      | 0.01208                       |
| Clinic Connectedness                        |           |                    |                    |                               |                               |
| Connected to specific physician             | -0.08553  | 0.05430            | 0.1153             | -0.1920                       | 0.02092                       |
| Connected to specific practice              | reference | n/a                | n/a                | n/a                           | n/a.                          |
| Lives in Urban Area                         | 0.3470    | 0.1270             | 0.0063             | 0.09804                       | 0.5959                        |
| Lives in Area with Low Physical Food Access | -0.07748  | 0.06097            | 0.2039             | -0.1970                       | 0.04205                       |
| Percentage of Area Living in Group Quarters | -0.00001  | 0.000060           | 0.8418             | -0.00013                      | 0.000106                      |
| Lives in Area with Low Vehicle Access       | 0.04455   | 0.04429            | 0.3145             | -0.04228                      | 0.1314                        |
| ZIP-level Unemployment Rate                 | 0.03710   | 0.01932            | 0.0549             | -0.00078                      | 0.07499                       |
| ZIP-level Median Household Income           | 1.636E-6  | Unable to estimate | Unable to estimate | Unable to estimate            | Unable to estimate            |
| ZIP-level Poverty Rate                      | -0.00359  | 0.005890           | 0.5418             | -0.01514                      | 0.007953                      |
| ZIP-level Segregation                       | -0.00001  | 0.001802           | 0.9950             | -0.00354                      | 0.003522                      |

eTable 15: Full models for association between ZIP-level mental health resources and hemoglobin A1c

|                                   | Estimate  | Standard Error | p-value | Lower 95% Confidence Interval | Upper 95% Confidence Interval |
|-----------------------------------|-----------|----------------|---------|-------------------------------|-------------------------------|
| Intercept                         | 7.0641    | 0.3371         | <.0001  | 6.4033                        | 7.7250                        |
| ZIP-level mental health resources | -0.00348  | 0.01130        | 0.7582  | -0.02564                      | 0.01868                       |
| ZIP-level afterschool resources   | 0.01159   | 0.006992       | 0.0974  | -0.00212                      | 0.02530                       |
| Age, years                        | -0.01058  | 0.001940       | <.0001  | -0.01438                      | -0.00678                      |
| Female                            | -0.1382   | 0.03843        | 0.0003  | -0.2135                       | -0.06283                      |
| Race/ethnicity                    |           |                |         |                               |                               |
| Asian/Multi/Other                 | -0.08415  | 0.08130        | 0.3007  | -0.2435                       | 0.07522                       |
| Non-Hispanic Black                | 0.07084   | 0.06217        | 0.2545  | -0.05103                      | 0.1927                        |
| Hispanic                          | 0.06543   | 0.08946        | 0.4646  | -0.1099                       | 0.2408                        |
| Non-Hispanic White                | reference | n/a            | n/a     | n/a                           | n/a.                          |
| Education                         |           |                |         |                               |                               |
| College or >                      | -0.1647   | 0.06820        | 0.0158  | -0.2984                       | -0.03095                      |
| High School Diploma               | -0.01936  | 0.06665        | 0.7715  | -0.1500                       | 0.1113                        |
| Less than High School Diploma     | -0.07325  | 0.07536        | 0.3312  | -0.2210                       | 0.07454                       |
| Unknown/Declined                  | reference | n/a            | n/a     | n/a                           | n/a.                          |
| Insurance                         |           |                |         |                               |                               |
| Private                           | 0.2135    | 0.05612        | 0.0001  | 0.1035                        | 0.3235                        |
| Medicare and Medicaid             | 0.03499   | 0.05767        | 0.5440  | -0.07805                      | 0.1480                        |
| Medicaid                          | 0.3913    | 0.06810        | <.0001  | 0.2578                        | 0.5248                        |
| Medicaid                          | reference | n/a            | n/a     | n/a                           | n/a.                          |
| English is Primary Language       | -0.1597   | 0.06502        | 0.0141  | -0.2871                       | -0.03218                      |
| History of Hypertension           | 0.2365    | 0.05985        | <.0001  | 0.1191                        | 0.3538                        |
| History of Coronary Heart Disease | -0.03931  | 0.04940        | 0.4262  | -0.1362                       | 0.05753                       |
| History of Depression             | -0.03699  | 0.05766        | 0.5212  | -0.1500                       | 0.07604                       |



eTable 15: Full models for association between ZIP-level mental health resources and hemoglobin A1c

|                                             | Estimate  | Standard Error     | p-value            | Lower 95% Confidence Interval | Upper 95% Confidence Interval |
|---------------------------------------------|-----------|--------------------|--------------------|-------------------------------|-------------------------------|
| History of Osteoarthritis                   | -0.1498   | 0.04009            | 0.0002             | -0.2284                       | -0.07123                      |
| Charlson Comorbidity Score                  | 0.01585   | 0.008146           | 0.0518             | -0.00012                      | 0.03182                       |
| Clinic Visits                               | 0.006518  | 0.002846           | 0.0220             | 0.000939                      | 0.01210                       |
| Clinic Connectedness                        |           |                    |                    |                               |                               |
| Connected to specific physician             | -0.08559  | 0.05429            | 0.1150             | -0.1920                       | 0.02085                       |
| Connected to specific practice              | reference | n/a                | n/a                | n/a                           | n/a.                          |
| Lives in Urban Area                         | 0.3477    | 0.1268             | 0.0061             | 0.09914                       | 0.5962                        |
| Lives in Area with Low Physical Food Access | -0.07867  | 0.06091            | 0.1966             | -0.1981                       | 0.04074                       |
| Percentage of Area Living in Group Quarters | -0.00001  | 0.000060           | 0.8517             | -0.00013                      | 0.000107                      |
| Lives in Area with Low Vehicle Access       | 0.04534   | 0.04440            | 0.3072             | -0.04169                      | 0.1324                        |
| ZIP-level Unemployment Rate                 | 0.03660   | 0.01940            | 0.0592             | -0.00143                      | 0.07462                       |
| ZIP-level Median Household Income           | 1.599E-6  | Unable to estimate | Unable to estimate | Unable to estimate            | Unable to estimate            |
| ZIP-level Poverty Rate                      | -0.00359  | 0.005889           | 0.5423             | -0.01513                      | 0.007956                      |
| ZIP-level Segregation                       | -0.00002  | 0.001802           | 0.9931             | -0.00355                      | 0.003517                      |

eTable 16: Full models for association between ZIP-level food resources and systolic blood pressure in those without hypertension

|                                 | Estimate | Standard Error | p-value | Lower 95% Confidence Interval | Upper 95% Confidence Interval |
|---------------------------------|----------|----------------|---------|-------------------------------|-------------------------------|
| Intercept                       | 118.75   | 2.4411         | <.0001  | 113.96                        | 123.54                        |
| ZIP-level food resources        | -0.08047 | 0.03550        | 0.0262  | -0.1511                       | -0.00980                      |
| ZIP-level afterschool resources | 0.06047  | 0.03336        | 0.0730  | -0.00574                      | 0.1267                        |

eTable 16: Full models for association between ZIP-level food resources and systolic blood pressure in those without hypertension

|                                 | Estimate  | Standard Error | p-value | Lower 95% Confidence Interval | Upper 95% Confidence Interval |
|---------------------------------|-----------|----------------|---------|-------------------------------|-------------------------------|
| Age, years                      | 0.1657    | 0.005420       | <.0001  | 0.1550                        | 0.1763                        |
| Female                          | -5.2802   | 0.1186         | <.0001  | -5.5126                       | -5.0477                       |
| Race/ethnicity                  |           |                |         |                               |                               |
| Asian/Multi/Other               | -2.6721   | 0.2363         | <.0001  | -3.1353                       | -2.2089                       |
| Non-Hispanic Black              | 0.6111    | 0.2706         | 0.0239  | 0.08082                       | 1.1415                        |
| Hispanic                        | -0.7475   | 0.2728         | 0.0061  | -1.2822                       | -0.2129                       |
| Non-Hispanic White              | reference | n/a            | n/a     | n/a                           | n/a.                          |
| Education                       |           |                |         |                               |                               |
| College or >                    | -0.02240  | 0.1940         | 0.9080  | -0.4026                       | 0.3577                        |
| High School Diploma             | 0.4658    | 0.2125         | 0.0284  | 0.04932                       | 0.8823                        |
| Less than High School Diploma   | 0.9903    | 0.2550         | 0.0001  | 0.4905                        | 1.4901                        |
| Unknown/Declined                | reference | n/a            | n/a     | n/a                           | n/a.                          |
| Insurance                       |           |                |         |                               |                               |
| Private                         | -4.3672   | 2.1456         | 0.0418  | -8.5725                       | -0.1618                       |
| Medicare and Medicaid           | -4.2024   | 2.1674         | 0.0525  | -8.4505                       | 0.04573                       |
| Medicaid                        | -4.6349   | 2.1479         | 0.0309  | -8.8449                       | -0.4248                       |
| Medicaid                        | -2.2777   | 2.1596         | 0.2916  | -6.5105                       | 1.9551                        |
| Self-pay                        | reference | n/a            | n/a     | n/a                           | n/a.                          |
| English is Primary Language     | 0.9827    | 0.2700         | 0.0003  | 0.4536                        | 1.5119                        |
| History of Depression           | -0.1126   | 0.2130         | 0.5970  | -0.5301                       | 0.3048                        |
| History of Osteoarthritis       | 0.5132    | 0.1754         | 0.0034  | 0.1695                        | 0.8570                        |
| Charlson Comorbidity Score      | 0.1840    | 0.04369        | <.0001  | 0.09834                       | 0.2696                        |
| Clinic Visits                   | -0.05715  | 0.01445        | <.0001  | -0.08548                      | -0.02882                      |
| Clinic Connectedness            |           |                |         |                               |                               |
| Connected to specific physician | -0.6938   | 0.1282         | <.0001  | -0.9450                       | -0.4425                       |

eTable 16: Full models for association between ZIP-level food resources and systolic blood pressure in those without hypertension

|                                             | Estimate  | Standard Error | p-value | Lower 95% Confidence Interval | Upper 95% Confidence Interval |
|---------------------------------------------|-----------|----------------|---------|-------------------------------|-------------------------------|
| Connected to specific practice              | reference | n/a            | n/a     | n/a                           | n/a.                          |
| Lives in Urban Area                         | -0.4004   | 0.3700         | 0.2793  | -1.1261                       | 0.3254                        |
| Lives in Area with Low Physical Food Access | 0.2289    | 0.1896         | 0.2274  | -0.1429                       | 0.6006                        |
| Percentage of Area Living in Group Quarters | -0.00031  | 0.000146       | 0.0348  | -0.00060                      | -0.00002                      |
| Lives in Area with Low Vehicle Access       | -0.00646  | 0.1455         | 0.9646  | -0.2917                       | 0.2788                        |
| ZIP-level Unemployment Rate                 | 0.2795    | 0.07224        | 0.0001  | 0.1373                        | 0.4218                        |
| ZIP-level Median Household Income           | -0.00002  | 3.286E-6       | <.0001  | -0.00002                      | -9.76E-6                      |
| ZIP-level Poverty Rate                      | -0.02364  | 0.02254        | 0.2968  | -0.06835                      | 0.02108                       |
| ZIP-level Segregation                       | 0.01658   | 0.006771       | 0.0154  | 0.003208                      | 0.02995                       |

**STROBE 2007 (v4) Statement—Checklist of items that should be included in reports of *cross-sectional studies***

| Section/Topic                | Item # | Recommendation                                                                                                                                                                       | Reported on page #        |
|------------------------------|--------|--------------------------------------------------------------------------------------------------------------------------------------------------------------------------------------|---------------------------|
| Title and abstract           | 1      | (a) Indicate the study's design with a commonly used term in the title or the abstract                                                                                               | 1                         |
|                              |        | (b) Provide in the abstract an informative and balanced summary of what was done and what was found                                                                                  | 3-4                       |
| <b>Introduction</b>          |        |                                                                                                                                                                                      |                           |
| Background/rationale         | 2      | Explain the scientific background and rationale for the investigation being reported                                                                                                 | 6-7                       |
| Objectives                   | 3      | State specific objectives, including any prespecified hypotheses                                                                                                                     | 7                         |
| <b>Methods</b>               |        |                                                                                                                                                                                      | <b>7-8</b>                |
| Study design                 | 4      | Present key elements of study design early in the paper                                                                                                                              |                           |
| Setting                      | 5      | Describe the setting, locations, and relevant dates, including periods of recruitment, exposure, follow-up, and data collection                                                      | 7-8                       |
| Participants                 | 6      | (a) Give the eligibility criteria, and the sources and methods of selection of participants                                                                                          | 7-8                       |
| Variables                    | 7      | Clearly define all outcomes, exposures, predictors, potential confounders, and effect modifiers. Give diagnostic criteria, if applicable                                             | 8-10                      |
| Data sources/<br>measurement | 8*     | For each variable of interest, give sources of data and details of methods of assessment (measurement). Describe comparability of assessment methods if there is more than one group | 8-10                      |
| Bias                         | 9      | Describe any efforts to address potential sources of bias                                                                                                                            | 10-13                     |
| Study size                   | 10     | Explain how the study size was arrived at                                                                                                                                            | 13                        |
| Quantitative variables       | 11     | Explain how quantitative variables were handled in the analyses. If applicable, describe which groupings were chosen and why                                                         | 10-13                     |
| Statistical methods          | 12     | (a) Describe all statistical methods, including those used to control for confounding                                                                                                | 10-13                     |
|                              |        | (b) Describe any methods used to examine subgroups and interactions                                                                                                                  | 10-13, technical appendix |
|                              |        | (c) Explain how missing data were addressed                                                                                                                                          | 10-13                     |
|                              |        | (d) If applicable, describe analytical methods taking account of sampling strategy                                                                                                   | 10-13                     |
|                              |        | (e) Describe any sensitivity analyses                                                                                                                                                | 10-13                     |

|                          |     |                                                                                                                                                                                                              |                             |
|--------------------------|-----|--------------------------------------------------------------------------------------------------------------------------------------------------------------------------------------------------------------|-----------------------------|
| <b>Results</b>           |     |                                                                                                                                                                                                              |                             |
| Participants             | 13* | (a) Report numbers of individuals at each stage of study—eg numbers potentially eligible, examined for eligibility, confirmed eligible, included in the study, completing follow-up, and analysed            | 13                          |
|                          |     | (b) Give reasons for non-participation at each stage                                                                                                                                                         | 13                          |
|                          |     | (c) Consider use of a flow diagram                                                                                                                                                                           | n/a                         |
| Descriptive data         | 14* | (a) Give characteristics of study participants (eg demographic, clinical, social) and information on exposures and potential confounders                                                                     | 13-14, table 1, etables 2-3 |
|                          |     | (b) Indicate number of participants with missing data for each variable of interest                                                                                                                          | Etables 2-3                 |
| Outcome data             | 15* | Report numbers of outcome events or summary measures                                                                                                                                                         | 14-15                       |
| Main results             | 16  | (a) Give unadjusted estimates and, if applicable, confounder-adjusted estimates and their precision (eg, 95% confidence interval). Make clear which confounders were adjusted for and why they were included | 14-15                       |
|                          |     | (b) Report category boundaries when continuous variables were categorized                                                                                                                                    | n/a                         |
|                          |     | (c) If relevant, consider translating estimates of relative risk into absolute risk for a meaningful time period                                                                                             | n/a                         |
| Other analyses           | 17  | Report other analyses done—eg analyses of subgroups and interactions, and sensitivity analyses                                                                                                               | 14-16, eappendix            |
| <b>Discussion</b>        |     |                                                                                                                                                                                                              |                             |
| Key results              | 18  | Summarise key results with reference to study objectives                                                                                                                                                     | 16                          |
| Limitations              | 19  | Discuss limitations of the study, taking into account sources of potential bias or imprecision. Discuss both direction and magnitude of any potential bias                                                   | 18-19                       |
| Interpretation           | 20  | Give a cautious overall interpretation of results considering objectives, limitations, multiplicity of analyses, results from similar studies, and other relevant evidence                                   | 19                          |
| Generalisability         | 21  | Discuss the generalisability (external validity) of the study results                                                                                                                                        | 19                          |
| <b>Other information</b> |     |                                                                                                                                                                                                              |                             |
| Funding                  | 22  | Give the source of funding and the role of the funders for the present study and, if applicable, for the original study on which the present article is based                                                | 20                          |

\*Give information separately for cases and controls in case-control studies and, if applicable, for exposed and unexposed groups in cohort and cross-sectional studies.

**Note:** An Explanation and Elaboration article discusses each checklist item and gives methodological background and published examples of transparent reporting. The STROBE checklist is best used in conjunction with this article (freely available on the Web sites of PLoS Medicine at <http://www.plosmedicine.org/>, Annals of Internal Medicine at <http://www.annals.org/>, and Epidemiology at <http://www.epidem.com/>). Information on the STROBE Initiative is available at [www.strobe-statement.org](http://www.strobe-statement.org).

# BMJ Open

## Association Between Access to Social Service Resources and Cardiometabolic Risk Factors: A Machine Learning and Multi-Level Modeling Analysis

|                                 |                                                                                                                                                                                                                                                                                                                                                                                                                                                                                                                                                                                                                                |
|---------------------------------|--------------------------------------------------------------------------------------------------------------------------------------------------------------------------------------------------------------------------------------------------------------------------------------------------------------------------------------------------------------------------------------------------------------------------------------------------------------------------------------------------------------------------------------------------------------------------------------------------------------------------------|
| Journal:                        | <i>BMJ Open</i>                                                                                                                                                                                                                                                                                                                                                                                                                                                                                                                                                                                                                |
| Manuscript ID                   | bmjopen-2018-025281.R1                                                                                                                                                                                                                                                                                                                                                                                                                                                                                                                                                                                                         |
| Article Type:                   | Research                                                                                                                                                                                                                                                                                                                                                                                                                                                                                                                                                                                                                       |
| Date Submitted by the Author:   | 13-Dec-2018                                                                                                                                                                                                                                                                                                                                                                                                                                                                                                                                                                                                                    |
| Complete List of Authors:       | Berkowitz, Seth; University of North Carolina at Chapel Hill School of Medicine, General Medicine and Clinical Epidemiology<br>Basu, Sanjay; Stanford University, Departments of Medicine and of Health Research and Policy<br>Venkataramani, Atheendar; University of Pennsylvania, Department of Medical Ethics and Health Policy, Perelman School of Medicine<br>Reznor, Gally; Massachusetts General Hospital, Division of General Internal Medicine<br>Fleegler, Eric; Children's Hospital Boston, Division of Emergency Medicine<br>Atlas, Steven; Massachusetts General Hospital, Division of General Internal Medicine |
| <b>Primary Subject Heading</b>: | Epidemiology                                                                                                                                                                                                                                                                                                                                                                                                                                                                                                                                                                                                                   |
| Secondary Subject Heading:      | General practice / Family practice, Health services research, Public health                                                                                                                                                                                                                                                                                                                                                                                                                                                                                                                                                    |
| Keywords:                       | SOCIAL MEDICINE, PRIMARY CARE, Hypertension < CARDIOLOGY, DIABETES & ENDOCRINOLOGY, Cardiac Epidemiology < CARDIOLOGY                                                                                                                                                                                                                                                                                                                                                                                                                                                                                                          |
|                                 |                                                                                                                                                                                                                                                                                                                                                                                                                                                                                                                                                                                                                                |

SCHOLARONE™  
Manuscripts

1  
2  
3 **Association Between Access to Social Service Resources and Cardiometabolic**  
4  
5 **Risk Factors: A Machine Learning and Multi-Level Modeling Analysis**  
6  
7  
8  
9

10 Seth A. Berkowitz<sup>1-3</sup>, Sanjay Basu<sup>4,5</sup>, Atheendar Venkataramani<sup>6,7</sup>, Gally Reznor<sup>8</sup>, Eric  
11 W. Fleegler<sup>9,10</sup>, Steven J. Atlas<sup>8,9</sup>  
12  
13

14  
15  
16 <sup>1</sup> Division of General Medicine and Clinical Epidemiology, Department of Medicine,  
17 University of North Carolina School of Medicine, Chapel Hill, NC  
18

19  
20 <sup>2</sup> The Cecil G. Sheps Center for Health Services Research, University of North  
21 Carolina at Chapel Hill, Chapel Hill, NC  
22

23  
24  
25 <sup>3</sup> Center for Health Equity Research, Department of Social Medicine, University of  
26 North Carolina School of Medicine, Chapel Hill, NC  
27

28  
29  
30 <sup>4</sup> Center for Primary Care and Outcomes Research, Center for Population Health  
31 Sciences, Departments of Medicine and of Health Research and Policy, Stanford  
32 University, Palo Alto, California  
33

34  
35  
36 <sup>5</sup> Center for Primary Care, Harvard Medical School  
37

38  
39  
40 <sup>6</sup> Department of Medical Ethics and Health Policy, Perelman School of Medicine,  
41 University of Pennsylvania, Philadelphia.  
42

43  
44  
45 <sup>7</sup> Leonard Davis Institute of Health Economics, University of Pennsylvania,  
46 Philadelphia.  
47

48  
49  
50 <sup>8</sup> Division of General Internal Medicine, Massachusetts General Hospital, Boston,  
51 Massachusetts  
52

53  
54  
55 <sup>9</sup> Harvard Medical School, Boston, Massachusetts  
56  
57

1  
2  
3 <sup>10</sup> Division of Emergency Medicine, Boston Children's Hospital, Boston,  
4  
5  
6 Massachusetts

7  
8  
9  
10 Corresponding Author and Request for Reprints:

11  
12 Seth A. Berkowitz, MD MPH

13  
14 5034 Old Clinic Bldg

15  
16  
17 CB 7110

18  
19  
20 Chapel Hill, NC 27599

21  
22 Tel: 919-966-2276

23  
24  
25 seth\_berkowitz@med.unc.edu

26  
27 Tables: 3

28  
29  
30 Figures: 1

31  
32 Word Count

33  
34 Abstract: 299/300

35  
36 Manuscript: 3341/4000

37  
38 Running Title: Social Service Resources and Cardiometabolic Risk

39  
40  
41 Key Words: cardiovascular disease, food insecurity, health disparities,  
42  
43 socioeconomic status  
44  
45  
46  
47  
48  
49  
50  
51  
52  
53  
54  
55  
56  
57



1  
2  
3 **Objectives:** Interest in linking patients with unmet social needs to area-level  
4 resources, such as food pantries and employment centers in one's ZIP code, is  
5 growing. However, whether the presence of these resources is associated with  
6 better health outcomes is unclear. We sought to determine if area-level resources,  
7 defined as organizations that assist individuals with meeting health-related social  
8 needs, are associated with lower levels of cardiometabolic risk factors.  
9

10  
11  
12  
13  
14  
15  
16  
17 **Design:** Cross-sectional.

18  
19  
20 **Setting:** Data were collected in a primary care network in eastern Massachusetts in  
21 2015.  
22

23  
24 **Participants and Primary and Secondary Outcome Measures:** 123,355

25 participants were included. The primary outcome was body mass index (BMI). The  
26 secondary outcomes were systolic blood pressure (SBP), low density lipoprotein  
27 cholesterol (LDL), and hemoglobin A1c (HbA1c). All participants were included in  
28 BMI analyses. Participants with hypertension were included in SBP analyses.  
29 Participants with an indication for cholesterol lowering were included in LDL  
30 analyses, and participants with diabetes mellitus were included in HbA1c analyses.  
31 We used a random forest-based machine-learning algorithm to identify types of  
32 resources associated with study outcomes. We then tested the association of ZIP-  
33 level selected resource types (three for BMI, two each for SBP and HbA1c analyses,  
34 and one for LDL analyses) with these outcomes, using multi-level models to account  
35 for individual-level, clinic-level, and other area-level factors.  
36  
37  
38  
39  
40  
41  
42  
43  
44  
45  
46  
47  
48  
49  
50

51  
52 **Results:** Resources associated with lower BMI included more food resources (-0.08  
53 kg/m<sup>2</sup> per additional resource, 95% Confidence Interval[CI] -0.13 to -0.03 kg/m<sup>2</sup>),  
54  
55  
56  
57

1  
2  
3 employment resources (-0.05 kg/m<sup>2</sup>, 95%CI -0.11 to -0.002 kg/m<sup>2</sup>), and nutrition  
4  
5 resources (-0.07 kg/m<sup>2</sup>, 95%CI -0.13 to -0.01 kg/m<sup>2</sup>). No area resources were  
6  
7 associated with differences in SBP, LDL, or HbA1c.  
8  
9

10 **Conclusions:** Access to specific local resources is associated with better BMI. Efforts  
11  
12 to link patients to area resources, and to improve the resources landscape within  
13  
14 communities, may help reduce BMI and improve population health.  
15  
16  
17  
18  
19  
20  
21  
22  
23  
24  
25  
26  
27  
28  
29  
30  
31  
32  
33  
34  
35  
36  
37  
38  
39  
40  
41  
42  
43  
44  
45  
46  
47  
48  
49  
50  
51  
52  
53  
54  
55  
56  
57

### Strengths and Limitations of the Study

- Strength: Extensive individual and area-level data
- Strength: Innovative machine learning methods to overcome issues of collinearity and avoid multiple testing
- Strength: Use hierarchical linear modeling to account for data structure
- Limitation: Cross-sectional study
- Limitation: No information on use of resources

1  
2  
3 Cardiometabolic disease remains the most common cause of morbidity and  
4 mortality in the U.S.<sup>1</sup> Though better control of cardiometabolic risk factors could  
5 substantially reduce this morbidity and mortality, individuals with low  
6 socioeconomic status (SES) are less likely to achieve recommended goals.<sup>2</sup> Among  
7 the reasons for this are patient-reported health-related social needs, including food  
8 insecurity, housing instability, and lack of transportation. These health-related  
9 social needs have been associated with higher levels of important cardiometabolic  
10 risk factors including increased body mass index (BMI), systolic blood pressure  
11 (SBP), low density lipoprotein cholesterol (LDL), and hemoglobin A1c (HbA1c), even  
12 after adjusting for factors like race/ethnicity, income, and education.<sup>3-8</sup> Proposed  
13 mechanisms linking health-related social needs to cardiometabolic risk factors  
14 including reduced dietary quality, cost-related medication underuse, reduced  
15 cognitive 'bandwidth' to attend to health, and disruptions in clinical care.<sup>9-11</sup>

16  
17  
18  
19  
20  
21  
22  
23  
24  
25  
26  
27  
28  
29  
30  
31  
32  
33  
34  
35  
36 Healthcare systems are increasingly interested in working with community partners  
37 to help link their patients to local resources, such as food pantries or housing  
38 agencies, to help meet health-related social needs.<sup>12-16</sup> This approach is exemplified  
39 by the Accountable Health Communities initiative from the Centers for Medicare &  
40 Medicaid Services, which involves screening for adverse social circumstances and  
41 linking those who screen positive to community resources.<sup>17</sup> However, there remain  
42 significant gaps in knowledge regarding such approaches. Critically, healthcare  
43 systems need to know which organizations to partner with, and potentially what  
44 types of resources to invest in.<sup>18</sup> The specific resources that best address a

1  
2  
3 particular health-related need may not be straightforward. For example, a food  
4  
5 pantry could help alleviate food insecurity, but so could employment.  
6  
7

8  
9  
10 To help address these issues, and inform further interventions, we sought to study  
11  
12 associations between area resources and cardiometabolic risk factors in a large  
13  
14 primary care network. Our goal was to understand which resource types were  
15  
16 associated with improved levels of BMI, SBP, LDL, and HbA1c, and to determine  
17  
18 whether area resources had stronger associations with cardiometabolic risk factors  
19  
20 for conditions that are less amenable to clinical management.  
21  
22  
23  
24  
25

## 26 **Methods**

### 27 *Setting and Study Sample*

28  
29 Data for this study came from two primary sources: an asset mapping of community  
30  
31 resources, and electronic health records. The asset mapping came from the  
32  
33 HelpSteps database, a comprehensive asset mapping of area resources in eastern  
34  
35 Massachusetts.<sup>19</sup> The clinical records came from a primary care network in eastern  
36  
37 Massachusetts, a network of 18 primary care practices, including hospital-based,  
38  
39 academic, and community health center sites. All adult (age  $\geq 18$  years) primary  
40  
41 care patients seen between January 1, 2012 and December 31, 2015 were included.  
42  
43 Data were current on December 31, 2015. The most recent patient address was  
44  
45 geocoded for the study. Patients without available addresses were excluded—prior  
46  
47 work has shown that only 0.15% of patients in this cohort could not be geocoded.<sup>20</sup>  
48  
49  
50  
51  
52  
53  
54  
55  
56  
57

1  
2  
3 The Partners Healthcare Human Research Committee exempted this analysis of  
4 secondary data without patient contact from IRB review.  
5  
6  
7  
8  
9

### 10 *Patient and Public Involvement*

11  
12 The study research question was developed in reference to patient priorities  
13 regarding the incorporation of neighborhood factors that promote health into  
14 population health management. Patients were not involved in the design of the  
15 study or in recruitment. We plan to disseminate study results via open-access  
16 publication.  
17  
18  
19  
20  
21  
22  
23  
24  
25

### 26 *Area Resources*

27  
28 HelpSteps ([www.helpsteps.com](http://www.helpsteps.com)) is a web and mobile screening and referral system  
29 for social needs. Originally launched in 2010, the system uses a database of social  
30 services throughout the greater Boston area to connect families to appropriate  
31 services. The database is maintained in collaboration between Boston Children's  
32 Hospital and the Mayor's Health Line at the Boston Public Health Commission.  
33  
34 Every agency is contacted at least once per year to maintain the accuracy of the data  
35 and to grow the database. HelpSteps contains information on area resources across  
36 16 non-mutually exclusive domains: health, housing, food employment, violence,  
37 safety, substance abuse, mental health, education, parenting, nutrition, after school,  
38 sexual health, transportation, diabetes, and care transitions. An example of  
39 organizations that would be in the food domain are food pantries. The employment  
40 domain would consist of job placement or job training services. And the nutrition  
41  
42  
43  
44  
45  
46  
47  
48  
49  
50  
51  
52  
53  
54  
55  
56  
57

1  
2  
3 domain would include organizations that provide food counseling. Agencies  
4  
5 providing multiple resources could be included in more than one domain. Because  
6  
7 individual-level data for this study came from 2015, we used information from  
8  
9 HelpSteps that was current as of 2015. For this study, 'area resources' are defined as  
10  
11 the number of organizations found in the HelpSteps database providing assistance  
12  
13 for a given domain and within a given geographic area.  
14  
15

16  
17 After geocoding the addresses for both individuals and the area resource  
18  
19 organization, we created counts, for each individual, of how many resources for each  
20  
21 domain were within the same geographic area as they were. We did this at 4  
22  
23 geographic levels in roughly increasing order of size: census tract (using U.S. Census  
24  
25 2010 boundaries), ZIP code tabulation area (which we refer to throughout this  
26  
27 paper as 'ZIP' level, owing to common use of the term, again using U.S. Census 2010  
28  
29 boundaries), 'neighborhood' (e.g. Allston, Roxbury, a designation based on Boston  
30  
31 city planning that may better capture actual movement patterns), and county.  
32  
33  
34  
35  
36  
37

### 38 *Clinical Outcomes*

39  
40 To assess clinical outcomes, we calculated the mean of all values recorded in 2015  
41  
42 from individual's electronic health record for the following measurements: body  
43  
44 mass index (in kg/m<sup>2</sup>), systolic blood pressure (in mm Hg), low-density lipoprotein  
45  
46 cholesterol (in mg/dL) and HbA1c (%). All values were obtained in the process of  
47  
48 usual care.  
49  
50  
51  
52  
53

### 54 *Covariates*

1  
2  
3 To account for possible confounding of the association between area resources and  
4 health outcomes, we collected the following variables from the electronic health  
5 record: age (years), gender (male or female), race/ethnicity (non-Hispanic white,  
6 non-Hispanic black, Hispanic, or Asian/other/multi), education (less than high  
7 school diploma, high school diploma [including GED], or greater than high school  
8 diploma), insurance (commercial, Medicare, Medicaid [including dual-eligibles], and  
9 uninsured/self-pay), number of clinic visits in 2015, primary language (English vs.  
10 other), connectedness to their primary care clinic using previously validated  
11 algorithm<sup>21</sup>, and comorbidity (Charlson comorbidity score, and individual indicators  
12 of depression, hypertension, coronary heart disease, osteoarthritis, and diabetes).  
13 To account for area-level differences from factors other than resources, we used  
14 data from the U.S. Census' American Community Survey (5-year estimates 2010-  
15 2015) and the USDA's Food Access Research Atlas: median household income,  
16 percent living in poverty, 'food desert' status [low-income, low food access census  
17 tract at 1/2 mile in urban areas and 10 miles in rural areas], unemployment rate,  
18 proportion of the area population living in group quarters (e.g., those living in a  
19 nursing facility unlikely to be exposed to area-level conditions), vehicle access, and  
20 housing segregation.<sup>22,23</sup>

### 21 22 23 24 25 26 27 28 29 30 31 32 33 34 35 36 37 38 39 40 41 42 43 44 45 46 47 48 *Statistical analysis*

49  
50 In this study, we wanted to evaluate the relationship between many resources types  
51 and cardiometabolic risk factors. A secondary goal of our study was to help  
52 understand the relationship that specific geographic levels and resource types had  
53  
54  
55  
56  
57



1  
2  
3 with clinical outcomes. Because the nested structure of our data violate the  
4  
5 statistical independence assumption that underlies parametric, regression-based  
6  
7 variable selection approaches (such as forward, backward, or step-wise selection),  
8  
9 and to avoid multiple hypothesis testing that may lead to the identification of  
10  
11 spurious associations, we employed a non-parametric machine learning technique  
12  
13 called variable selecting using random forest (VSURF) to screen through variables in  
14  
15 the derivation set.<sup>24,25</sup> This was done using a derivation dataset, which consisted of a  
16  
17 random partition of the entire dataset. Finally, we used multi-level modeling in the  
18  
19 test set (not used in the derivation stage) to test a small number of candidate  
20  
21 variables identified by VSURF as being most important to explaining variations in  
22  
23 the derivation set. VSURF is described in more detail in the technical appendix and  
24  
25 eFigure 1.  
26  
27  
28  
29  
30  
31  
32  
33

### 34 Multi-level modeling

35  
36 In the test dataset, we fit multi-level linear mixed models to test the association  
37  
38 between variables identified in the VSURF step and the outcome of interest. The BMI  
39  
40 model included all study participants. The SBP model included those with a  
41  
42 diagnosis of hypertension. The LDL model included those with common diagnoses  
43  
44 (hypertension, diabetes, coronary heart disease, cerebrovascular disease, congestive  
45  
46 heart failure) where LDL lowering is most beneficial. The HbA1c models included  
47  
48 those with a diagnosis of diabetes. The models used fixed effects to adjust for age,  
49  
50 gender, race/ethnicity, education, insurance, number of clinic visits, language, clinic  
51  
52 connectedness, comorbidity, and census tract level median household income,  
53  
54  
55  
56  
57

1  
2  
3 poverty rates, 'food desert' status, unemployment, numbers living in group quarters,  
4  
5 vehicle access, and segregation. To account for clustering within practices, we  
6  
7 included a practice-level random effects term. To account for area-level clustering,  
8  
9 we used a ZIP-level random effects term. These were fit as crossed effects models  
10  
11 (i.e., we did not nest practices within ZIP codes) to allow for the fact that patients  
12  
13 are often seen in practices outside of their ZIP code of residence.  
14  
15  
16  
17  
18

### 19 Falsification tests

20  
21 To reduce the possibility that observed associations due to other unmeasured  
22  
23 characteristics of the area, rather than the specific area resource tested, we also  
24  
25 conducted falsification analyses. To do this, we used the same modeling approach as  
26  
27 above, but tested for the association between area after school resources for  
28  
29 children and the outcome of interest. Our reasoning was that, since there was  
30  
31 unlikely to be any direct effect of afterschool resources for children on adult body  
32  
33 mass index, any observed association would reflect unmeasured area-  
34  
35 characteristics not appropriately adjusted for in our model (such as high levels of  
36  
37 civic engagement or community organization, or other beneficial resources).  
38  
39  
40  
41  
42  
43  
44

### 45 Variations in clinical management

46  
47 To help explore whether variations in the intensity of clinical management could  
48  
49 explain whether community resources were associated with health outcomes, we  
50  
51 also used the above modeling approach to test whether area resources were  
52  
53 associated with SBP in those *without* a diagnosis of hypertension. The primary care  
54  
55  
56  
57

1  
2  
3 network in the study has quality improvement program that emphasize the  
4 importance of SBP, LDL, and HbA1c control in appropriate clinical populations.  
5  
6 Since BMI (in any population) and SBP control in those without a diagnosis of  
7  
8 hypertension are not included in these programs, we reasoned that area resources  
9  
10 may be more important when clinicians are not intensively attempting to impact an  
11  
12 outcome. We focused on BMI and systolic blood pressure among those *without*  
13  
14 hypertension for this because BMI and SBP are routinely measured at all practice  
15  
16 visits for all patients.  
17  
18  
19  
20  
21  
22  
23

24 Because of its mechanistically plausible relationship with BMI, we used the  
25  
26 association between ZIP-level food resources and BMI as the primary outcome, with  
27  
28 secondary analyses being the associations between other VSURF selected area  
29  
30 resources and clinical outcomes.  
31  
32  
33  
34  
35

### 36 Robustness checks

37  
38  
39  
40

41 In addition to the main analyses, we conducted a series of robustness checks that  
42  
43 examined whether different specifications of resources in the area (e.g. resources  
44  
45 per capita or resources per capita living in poverty) or different functional forms  
46  
47 (e.g. including polynomial terms or using splines) would alter the observed  
48  
49 associations between area-level resources and outcomes. We also conducted  
50  
51 analyses restricted to those with indicators of lower socioeconomic status (high  
52  
53 school diploma or lower educational attainment, living in a ZIP where > 15% of  
54  
55  
56  
57

1  
2  
3 individuals are in poverty) to ensure the results were applicable to those most likely  
4  
5 to utilize the resources studied.  
6  
7  
8  
9

10 A p-value of  $< 0.05$  was taken to indicate statistical significance. Analyses were  
11  
12 conducted in SAS Version 9.4 (Cary, NC), Stata 14 (College Station, TX), and R  
13  
14 version 3.3.4 (Vienna, Austria).  
15  
16  
17  
18

## 19 **Results**

20  
21 Overall, 123,355 participants were included in the study. All participants were  
22  
23 eligible for the BMI analyses. Based on inclusion criteria, 43,509 were included in  
24  
25 the hypertension analyses, 46,940 were included in the LDL analyses, and 13,127  
26  
27 were included in the diabetes analyses. Demographic characteristics of the overall  
28  
29 sample are presented in Table 1. Demographic characteristics of the samples used in  
30  
31 the hypertension, LDL cholesterol, and diabetes analyses are presented in eTables 1-  
32  
33 3. Overall, the mean age was 52.4 (SD 16.9) years, the sample was 41.5% male,  
34  
35 82.1% non-Hispanic white, 5.8% non-Hispanic black, and 6.5% Hispanic. The  
36  
37 median number of years participants were followed in our network was 9  
38  
39 (intraquartile range (IQR): 3, 10), and the median number change of address per  
40  
41 year followed was 0.1 (IQR 0.1, 0.25), suggesting that participants resided at their  
42  
43 current address for the majority of their time in our network.  
44  
45  
46  
47  
48  
49  
50  
51

52 In general, individuals living in areas with more resources were had lower  
53  
54 educational attainment and higher rates of Medicaid insurance coverage (eTable 4).  
55  
56  
57

1  
2  
3 Maps depicting the distribution of the resources are presented in Figure 1 and  
4  
5 eFigures 2-3.  
6  
7  
8  
9

10 The mean BMI in the sample was 27.8 (SD 6.2) kg/m<sup>2</sup>. In the hypertension analyses,  
11  
12 the mean BP was 131.6 (SD 15.8) mmHg. In the LDL analyses, the mean LDL was  
13  
14 102.9 (SD 39.8) mg/dL, and in the diabetes analyses the mean HbA1c was 7.1 (SD  
15  
16 1.5)%.  
17  
18  
19

20  
21  
22 Among geographic levels assessed, all resources selected were at the ZIP level  
23  
24 (Table 2). For the BMI analyses, the selected resources were ZIP level food  
25  
26 resources, ZIP level employment resources, and ZIP level nutrition resources. For  
27  
28 hypertension analyses, the selected resources were ZIP housing and ZIP nutrition  
29  
30 resources. For LDL analyses, the only selected resource was ZIP nutrition resources.  
31  
32 For diabetes analyses, the selected resources were ZIP mental health and ZIP  
33  
34 substance use resources.  
35  
36  
37  
38  
39

40  
41 For the BMI analyses, we tested the association between selected resources and  
42  
43 BMI, adjusting for the factors described in the statistical analysis section, and  
44  
45 accounting for clustering at the clinic and ZIP level with multi-level linear mixed  
46  
47 models. We found that resources associated with lower BMI included more food  
48  
49 resources (-0.08 kg/m<sup>2</sup> per additional resource, 95% Confidence Interval[CI] -0.13  
50  
51 to -0.03 kg/m<sup>2</sup>, p= .001), employment resources (-0.05 kg/m<sup>2</sup>, 95%CI -0.11 to -0.002  
52  
53 kg/m<sup>2</sup>, p=.04), and nutrition resources (-0.07 kg/m<sup>2</sup>, 95%CI -0.13 to -0.01 kg/m<sup>2</sup>,  
54  
55  
56  
57

1  
2  
3 p=.02) (full models for these and all robustness checks in eAppendix tables 5-16).  
4  
5 Table 3 compares mean BMI and obesity prevalence at selected numbers of  
6  
7 resources, adjusted for the other factors in the model. For example, the mean BMI in  
8  
9 neighborhoods with the median (0) number of food resources was 27.8 kg/m<sup>2</sup>,  
10  
11 while the mean BMI in neighborhoods in the 75<sup>th</sup> percentile (3 resources) was 27.5  
12  
13 kg/m<sup>2</sup>, and the 90<sup>th</sup> percentile (8 resources) was 27.1 kg/m<sup>2</sup>. Falsification tests  
14  
15 found the expected lack of association between afterschool resources and BMI  
16  
17 (p=.67).  
18  
19  
20  
21  
22  
23

24 Robustness checks found that our results did not vary substantially with other  
25  
26 specifications of area-level resources (eTables 5-7).  
27  
28  
29  
30

31 In the hypertension analyses, neither housing resources (-0.05 mm Hg per  
32  
33 additional resource, 95%CI -0.16 to 0.06 mm Hg, p=.41) nor nutrition resources  
34  
35 (0.01 mm Hg, 95%CI -0.13 to 0.16 mm Hg, p=.87) were associated with systolic  
36  
37 blood pressure after adjustment for individual level and area level characteristics. In  
38  
39 LDL analyses, nutrition resources (0.10 mg/dL per additional resource, 95%CI -0.36  
40  
41 to 0.55 mg/dL, p=.67) were not associated with LDL cholesterol in adjusted models.  
42  
43 In diabetes analyses, neither substance abuse resources (-0.003% per additional  
44  
45 resource, 95%CI -0.03 to 0.02%, p=.86) nor mental health resources were  
46  
47 associated with HbA1c (-0.003 %, 95%CI -0.03 to 0.02%, p=.76).  
48  
49  
50  
51  
52  
53  
54  
55  
56  
57

1  
2  
3 In analyses looking at systolic blood pressure among those without a diagnosis of  
4 hypertension (i.e., those with no reason for clinical management of blood pressure),  
5  
6 food resources were associated with lower systolic blood pressure in linear mixed  
7  
8 models adjusted for the same factors as above (-0.08 mm Hg per additional  
9  
10 resource, 95%CI -0.15 to -0.01 mm Hg, p=.03). Mean systolic blood pressure was  
11  
12 approximately 1 mm Hg lower at the 95<sup>th</sup> percentile (118.9 mm Hg) of food  
13  
14 resources compared with the 50<sup>th</sup> percentile (119.8 mm Hg).  
15  
16  
17  
18  
19  
20  
21

22 Full models for all analyses are presented in eTables 8-16.  
23  
24  
25

## 26 **Discussion**

27  
28  
29 This study assessed the relationship among area resources and cardiometabolic risk  
30  
31 factors. We found that increasing numbers of food, employment, and nutrition  
32  
33 resources was associated with lower BMI, and lower systolic blood pressure among  
34  
35 those without hypertension. The magnitude of the difference was meaningful at the  
36  
37 population level, as the 0.7 kg/m<sup>2</sup> difference in BMI between individuals in a well-  
38  
39 resourced versus poorly resourced ZIP is similar to the 0.6 increase kg/m<sup>2</sup> in BMI in  
40  
41 the overall U.S. population from 2006 to 2016.<sup>26</sup>  
42  
43  
44  
45  
46  
47

48 Conversely, we found that area resources were not associated with systolic blood  
49  
50 pressure among those with hypertension, LDL cholesterol among those with an  
51  
52 indication for LDL lowering, or hemoglobin A1c among those with diabetes. This  
53  
54 suggests that the relationship between area resources and cardiometabolic risk  
55  
56  
57

1  
2  
3 factors may vary based on whether these factors are targets of intensive clinical  
4  
5 management.  
6  
7  
8  
9

10 This study enhances our knowledge regarding the association of area-level factors  
11 and cardiometabolic risk factors. Prior studies have consistently found that adverse  
12 area-level factors, such as poverty, are associated with increased cardiometabolic  
13 risk, even when adjusting for individual-level factors, such as income.<sup>2,27-29</sup>  
14  
15  
16  
17  
18

19 However, we did not know whether the presence of area resources that might  
20 plausibly support health, such as food and nutrition resources, would be associated  
21 with lower cardiometabolic risk.  
22  
23  
24  
25  
26  
27  
28

29 The positive and negative associations between community resources and  
30 cardiometabolic risk factors may have important public health implications. The  
31 association between increased area resources and lower BMI suggests that efforts to  
32 help link patients to community resources, and to help improve the resources  
33 landscape within communities, may be a successful strategy for improving  
34 population health, particularly for risk factors such as BMI where clinical  
35 management may not be prioritized.<sup>13,14,30</sup> This is reinforced by the finding that SBP,  
36 among those without hypertension, is lower in those living in areas with more  
37 resources. Since SBP does not come under clinical management for those without  
38 hypertension, this finding supports the potential for area resources to impact  
39 population health, and is consistent with guidelines that recommend lifestyle, rather  
40 than pharmacologic, approaches to pre-hypertension treatment.<sup>31</sup> Future work in  
41  
42  
43  
44  
45  
46  
47  
48  
49  
50  
51  
52  
53  
54  
55  
56  
57  
58  
59  
60



1  
2  
3 this area should investigate whether interventions that link individuals to area  
4  
5 resources show clinical benefits.  
6  
7  
8  
9

10 Our finding should be interpreted in light of several limitations. We did not have  
11  
12 access to data regarding use of the resources. This means that we do not know  
13  
14 whether individuals made use of the resources in their community. In light of this,  
15  
16 the association between ZIP-level resources and outcomes could be viewed  
17  
18 analogously to an 'encouragement design' intervention. This means that the  
19  
20 association estimated in this study is likely different than the association that would  
21  
22 be estimated if analyzing those who were known to use the resource. That  
23  
24 association is clearly of policy interest, and should be examined in future work.  
25  
26 While we adjusted for several individual-level and area-level socioeconomic status  
27  
28 indicators in order to capture the multidimensional nature of socioeconomic status  
29  
30 and, thus, reduce confounding, it is possible that residual confounding, owing to  
31  
32 unmeasured characteristics, exists, which would tend to reduce the observed  
33  
34 associations between area-resources and outcomes. Additional unmeasured  
35  
36 covariates that could affect the observed associations include local culture, and the  
37  
38 quality of the resources available. Devising methodology to determine the quality of  
39  
40 the services provided to help meet health-related social needs is pressing, and will  
41  
42 be an important direction for future investigation. Next, our study was cross-  
43  
44 sectional, and thus we cannot establish time-ordering between the exposure and the  
45  
46 cardiometabolic outcomes. However, we think it is less likely that lower BMI would  
47  
48 drive individuals into areas with more resources than vice versa, as areas with  
49  
50  
51  
52  
53  
54  
55  
56  
57

1  
2  
3 higher resources tended to have other adverse features, such as lower income and  
4  
5 higher poverty, which are likely more salient considerations for those choosing  
6  
7 where to live. Finally, because of the relatively high residential stability within this  
8  
9 primary care population, we only examined the association between current area of  
10  
11 residence and the study outcomes. However, for those who do move, this could lead  
12  
13 to misclassification, which would tend to bias results to the null. These limitations  
14  
15 are balanced by several strengths. We had access to a detailed mapping of area  
16  
17 resources, along with detailed individual-level health information. Further, in  
18  
19 addition to the multi-level framework we used, the use of falsification tests  
20  
21 demonstrated that unadjusted area-level factors are not likely to explain the  
22  
23 observed results.  
24  
25  
26  
27  
28  
29  
30

31 In summary, ZIP-level food, employment, and nutrition resources were associated  
32  
33 with BMI differences that were clinically meaningfully and statistically significant.  
34  
35 Further, the association between area resources and cardiometabolic risk factors  
36  
37 differed based on the specific risk factor. Investing in area resources and linkage  
38  
39 programs may be an important way to help reduce cardiometabolic risk for  
40  
41 vulnerable individuals, especially for situations not under intensive clinical  
42  
43 management.  
44  
45  
46  
47  
48  
49  
50  
51  
52  
53  
54  
55  
56  
57

## Acknowledgements

**Competing Interest Statement:** All authors declare they have nothing to disclose

**Guarantor:** Seth A. Berkowitz had full access to all of the data in the study and takes full responsibility for the work as a whole, including the study design, access to data, the integrity of the data, the accuracy of the data analysis, and the decision to submit and publish the manuscript.

**Funding Statement:** Research reported in this publication was supported by the National Institute for Diabetes and Digestive and Kidney Disease of the National Institutes of Health, and the National Institute on Minority Health and Health Disparities of the National Institutes of Health under Award Numbers DP2MD010478 (SB), U54MD010724 (SB), and K23DK109200 (SAB). The content is solely the responsibility of the authors and does not necessarily represent the official views of the National Institutes of Health.

**Author Contribution List:** SAB conducted the data analysis, wrote the first draft of the manuscript, and is the guarantor of the article. SAB, EWF, and SJA conceived of the study. GR assisted with data analysis. SB, AV, and GR contributed to interpretation of results and critical revision of the manuscript for intellectual context. All authors (SAB, SB, AV, GR, EF, and SJA) read and approved the final manuscript for submission.

**Data Sharing Statement:** Statistical code will be available concurrent with publication from the corresponding author. Owing to privacy concerns, study data cannot be made publically available. Study Protocol: Not available.

## References

1. Centers for Disease Control and Prevention. Deaths and Mortality. <https://www.cdc.gov/nchs/fastats/deaths.htm>. Published March 5, 2018. Accessed March 19, 2018.
2. Havranek EP, Mujahid MS, Barr DA, et al. Social Determinants of Risk and Outcomes for Cardiovascular Disease: A Scientific Statement From the American Heart Association. *Circulation*. 2015;132(9):873-898. doi:10.1161/CIR.0000000000000228
3. Berkowitz SA, Baggett TP, Wexler DJ, Huskey KW, Wee CC. Food insecurity and metabolic control among U.S. adults with diabetes. *Diabetes Care*. 2013;36(10):3093-3099. doi:10.2337/dc13-0570
4. Berkowitz SA, Meigs JB, DeWalt D, et al. Material need insecurities, control of diabetes mellitus, and use of health care resources: results of the Measuring Economic Insecurity in Diabetes study. *JAMA Intern Med*. 2015;175(2):257-265. doi:10.1001/jamainternmed.2014.6888
5. Berkowitz SA, Berkowitz TSZ, Meigs JB, Wexler DJ. Trends in food insecurity for adults with cardiometabolic disease in the United States: 2005-2012. *PloS One*. 2017;12(6):e0179172. doi:10.1371/journal.pone.0179172
6. Seligman HK, Laraia BA, Kushel MB. Food insecurity is associated with chronic disease among low-income NHANES participants. *J Nutr*. 2010;140(2):304-310. doi:10.3945/jn.109.112573
7. Baer TE, Scherer EA, Richmond TK, Fleegler EW, Hassan A. Food Insecurity, Weight Status, and Perceived Nutritional and Exercise Barriers in an Urban Youth Population. *Clin Pediatr (Phila)*. 2018;57(2):152-160. doi:10.1177/0009922817693301
8. Morales ME, Berkowitz SA. The Relationship Between Food Insecurity, Dietary Patterns, and Obesity. *Curr Nutr Rep*. 2016;5(1):54-60. doi:10.1007/s13668-016-0153-y
9. Seligman HK, Schillinger D. Hunger and socioeconomic disparities in chronic disease. *N Engl J Med*. 2010;363(1):6-9. doi:10.1056/NEJMp1000072
10. Berkowitz SA, Seligman HK, Choudhry NK. Treat or eat: food insecurity, cost-related medication underuse, and unmet needs. *Am J Med*. 2014;127(4):303-310.e3. doi:10.1016/j.amjmed.2014.01.002

11. Keene DE, Guo M, Murillo S. "That wasn't really a place to worry about diabetes": Housing access and diabetes self-management among low-income adults. *Soc Sci Med* 1982. 2018;197:71-77. doi:10.1016/j.socscimed.2017.11.051
12. Hassan A, Blood EA, Pikcinglis A, et al. Youths' health-related social problems: concerns often overlooked during the medical visit. *J Adolesc Health Off Publ Soc Adolesc Med*. 2013;53(2):265-271. doi:10.1016/j.jadohealth.2013.02.024
13. Hassan A, Scherer EA, Pikcinglis A, et al. Improving Social Determinants of Health: Effectiveness of a Web-Based Intervention. *Am J Prev Med*. 2015;49(6):822-831. doi:10.1016/j.amepre.2015.04.023
14. Berkowitz SA, Hulberg AC, Standish S, Reznor G, Atlas SJ. Addressing Unmet Basic Resource Needs as Part of Chronic Cardiometabolic Disease Management. *JAMA Intern Med*. 2017;177(2):244-252. doi:10.1001/jamainternmed.2016.7691
15. Gottlieb LM, Wing H, Adler NE. A Systematic Review of Interventions on Patients' Social and Economic Needs. *Am J Prev Med*. July 2017. doi:10.1016/j.amepre.2017.05.011
16. Gottlieb LM, Hessler D, Long D, et al. Effects of Social Needs Screening and In-Person Service Navigation on Child Health: A Randomized Clinical Trial. *JAMA Pediatr*. 2016;170(11):e162521. doi:10.1001/jamapediatrics.2016.2521
17. Alley DE, Asomugha CN, Conway PH, Sanghavi DM. Accountable Health Communities--Addressing Social Needs through Medicare and Medicaid. *N Engl J Med*. 2016;374(1):8-11. doi:10.1056/NEJMp1512532
18. Bauer SR, Monuteaux MC, Fleegler EW. Geographic Disparities in Access to Agencies Providing Income-Related Social Services. *J Urban Health Bull N Y Acad Med*. 2015;92(5):853-863. doi:10.1007/s11524-015-9971-2
19. Fleegler E, J. Bottino C, Pikcinglis A, Baker B, Kistler E, Hassan A. Referral System Collaboration Between Public Health and Medical Systems: A Population Health Case Report. *Natl Acad Med Perspect Popul Health Case Rep*. May 2016.
20. Berkowitz SA, Traore CY, Singer DE, Atlas SJ. Evaluating area-based socioeconomic status indicators for monitoring disparities within health care systems: results from a primary care network. *Health Serv Res*. 2015;50(2):398-417. doi:10.1111/1475-6773.12229
21. Atlas SJ, Grant RW, Ferris TG, Chang Y, Barry MJ. Patient-physician connectedness and quality of primary care. *Ann Intern Med*. 2009;150(5):325-335.

- 1  
2  
3  
4  
5  
6  
7  
8  
9  
10  
11  
12  
13  
14  
15  
16  
17  
18  
19  
20  
21  
22  
23  
24  
25  
26  
27  
28  
29  
30  
31  
32  
33  
34  
35  
36  
37  
38  
39  
40  
41  
42  
43  
44  
45  
46  
47  
48  
49  
50  
51  
52  
53  
54  
55  
56  
57  
58  
59  
60
22. USDA Food Access Research Atlas Documentation. <https://www.ers.usda.gov/data-products/food-access-research-atlas/documentation/>. Accessed August 11, 2017.
  23. Napierala J, Denton N. Measuring Residential Segregation With the ACS: How the Margin of Error Affects the Dissimilarity Index. *Demography*. 2017;54(1):285-309. doi:10.1007/s13524-016-0545-z
  24. Genuer R, Poggi J-M, Tuleau-Malot C. Variable Selection Using Random Forests. *Pattern Recogn Lett*. 2010;31(14):2225–2236. doi:10.1016/j.patrec.2010.03.014
  25. Genuer R, Poggi J-M, Tuleau-Malot C. VSURF: An R Package for Variable Selection Using Random Forests. *R J*. 2015;7(2):19-33.
  26. Trends in adult body-mass index in 200 countries from 1975 to 2014: a pooled analysis of 1698 population-based measurement studies with 19.2 million participants. *The Lancet*. 2016;387(10026):1377-1396. doi:10.1016/S0140-6736(16)30054-X
  27. Thomas AJ, Eberly LE, Davey Smith G, Neaton JD, Stamler J. Race/Ethnicity, Income, Major Risk Factors, and Cardiovascular Disease Mortality. *Am J Public Health*. 2005;95(8):1417-1423. doi:10.2105/AJPH.2004.048165
  28. Diez Roux AV. Investigating Neighborhood and Area Effects on Health. *Am J Public Health*. 2001;91(11):1783-1789. doi:10.2105/AJPH.91.11.1783
  29. Kelli HM, Hammadah M, Ahmed H, et al. Association Between Living in Food Deserts and Cardiovascular Risk. *Circ Cardiovasc Qual Outcomes*. 2017;10(9):e003532. doi:10.1161/CIRCOUTCOMES.116.003532
  30. Garg A, Toy S, Tripodis Y, Silverstein M, Freeman E. Addressing social determinants of health at well child care visits: a cluster RCT. *Pediatrics*. 2015;135(2):e296-304. doi:10.1542/peds.2014-2888
  31. Whelton PK, Carey RM, Aronow WS, et al. 2017 ACC/AHA/AAPA/ABC/ACPM/AGS/APhA/ASH/ASPC/NMA/PCNA Guideline for the Prevention, Detection, Evaluation, and Management of High Blood Pressure in Adults: A Report of the American College of Cardiology/American Heart Association Task Force on Clinical Practice Guidelines. *Hypertension*. January 2017:HYP.0000000000000065. doi:10.1161/HYP.0000000000000065

Table 1: Demographics of study sample

|                                       | N=123,355              |
|---------------------------------------|------------------------|
|                                       | Mean (SD) or n (%)     |
| Age                                   | 52.42 (16.89)          |
| Male                                  | 51665 (41.9)           |
| Race/ethnicity                        |                        |
| Asian/Multi/Other                     | 6880 (5.6)             |
| Non-Hispanic Black                    | 7203 (5.8)             |
| Hispanic                              | 8039 (6.5)             |
| Non-Hispanic White                    | 101233 (82.1)          |
| Education                             |                        |
| College or >                          | 56302 (45.6)           |
| High School Diploma                   | 36572 (29.6)           |
| Less than High School Diploma         | 18051 (14.6)           |
| Unknown/Declined                      | 12430 (10.1)           |
| Insurance                             |                        |
| Private                               | 75787 (61.4)           |
| Medicare and Medicaid                 | 8602 (7.0)             |
| Medicaid                              | 20934 (17.0)           |
| Medicare                              | 17911 (14.5)           |
| Self-pay                              | 121 (0.1)              |
| English is Primary Language           | 112720 (91.4)          |
| History of Hypertension               | 43509 (35.3)           |
| History of Coronary Heart Disease     | 9275 (7.5)             |
| History of Diabetes Mellitus          | 13127 (10.6)           |
| History of Depression                 | 10300 (8.3)            |
| History of Osteoarthritis             | 23707 (19.2)           |
| Charlson Comorbidity Score            | 1.72 (2.23)            |
| Clinic Visits                         | 6.57 (5.77)            |
| Clinic Connectedness                  |                        |
| Connected to specific physician       | 80345 (65.1)           |
| Connected to specific practice        | 34018 (27.6)           |
| Other                                 | 8992 (7.3)             |
| Lives in Urban Area                   | 91095 (96.4)           |
| ZIP-level Unemployment Rate, %        | 4.71 (1.60)            |
| ZIP-level Median Household Income, \$ | 82309.16<br>(31758.79) |
| ZIP-level Poverty Rate, %             | 8.70 (6.72)            |
| ZIP-level Segregation*                | 69.51 (21.05)          |
| Body Mass Index, kg/m <sup>2</sup>    | 27.84 (6.24)           |
| Systolic Blood Pressure, mm Hg        | 124.36 (14.96)         |

|                        |                |
|------------------------|----------------|
| LDL cholesterol, mg/dL | 110.83 (39.95) |
| Hemoglobin A1c, %      | 5.94 (1.22)    |

\*Segregation index is a dissimilarity measure of the extent to which groups other than non-Hispanic whites are distributed like non-Hispanic whites. 0 represents complete integration and 100 represents complete segregation.

For peer review only



Table 2: Distribution of the Number of Resources in the Selected Resource Categories

| BMI Analyses            |         |                             |                             |                             |                             |                             |         |
|-------------------------|---------|-----------------------------|-----------------------------|-----------------------------|-----------------------------|-----------------------------|---------|
| Resource*               | Minimum | 25 <sup>th</sup> Percentile | 50 <sup>th</sup> Percentile | 75 <sup>th</sup> Percentile | 90 <sup>th</sup> Percentile | 95 <sup>th</sup> Percentile | Maximum |
| Food                    | 0       | 0                           | 0                           | 3                           | 8                           | 11                          | 27      |
| Employment              | 0       | 0                           | 0                           | 4                           | 13                          | 18                          | 33      |
| Nutrition               | 0       | 0                           | 0                           | 3                           | 6                           | 12                          | 21      |
| Hypertension Analyses   |         |                             |                             |                             |                             |                             |         |
| Housing                 | 0       | 0                           | 0                           | 2                           | 8                           | 8                           | 23      |
| Nutrition               | 0       | 0                           | 0                           | 3                           | 6                           | 12                          | 21      |
| LDL Analyses            |         |                             |                             |                             |                             |                             |         |
| Nutrition               | 0       | 0                           | 0                           | 3                           | 6                           | 12                          | 21      |
| Diabetes Analyses       |         |                             |                             |                             |                             |                             |         |
| Mental health           | 0       | 0                           | 0                           | 2                           | 5                           | 6                           | 21      |
| Substance use resources | 0       | 0                           | 1                           | 2                           | 5                           | 6                           | 23      |

\*All resources assessed at ZIP level; table represents counts of each resource type

Table 3: Estimated BMI, in kg/m<sup>2</sup>, by resource level

| ZIP-level Food Resources       |       |
|--------------------------------|-------|
| 50 <sup>th</sup> Percentile    | 27.78 |
| 75 <sup>th</sup> Percentile    | 27.53 |
| 90 <sup>th</sup> Percentile    | 27.11 |
| 95 <sup>th</sup> Percentile    | 26.85 |
| ZIP-level Employment Resources |       |
| 50 <sup>th</sup> Percentile    | 27.78 |
| 75 <sup>th</sup> Percentile    | 27.56 |
| 90 <sup>th</sup> Percentile    | 27.07 |
| 95 <sup>th</sup> Percentile    | 26.80 |
| ZIP-level Nutrition Resources  |       |
| 50 <sup>th</sup> Percentile    | 27.75 |
| 75 <sup>th</sup> Percentile    | 27.54 |
| 90 <sup>th</sup> Percentile    | 27.32 |
| 95 <sup>th</sup> Percentile    | 26.89 |

Estimates created using least-squares means from fitted multi-level models. The models used fixed effects to adjust for age, gender, race/ethnicity, education, insurance, number of clinic visits, language, clinic connectedness, comorbidity, and census tract level median household income, poverty rates, 'food desert' status, unemployment, numbers living in group quarters, vehicle access, and segregation. To account for clustering within practices, we included a practice-level random effects term. To account for area-level clustering, we used a ZIP-level random effects term. These were fit as crossed effects models (i.e., we did not nest practices within ZIP codes) to allow for the fact that patients are often seen in practices outside of their ZIP code of residence.

1  
2  
3  
4  
5  
6  
7  
8  
9  
10  
11  
12  
13  
14  
15  
16  
17  
18  
19  
20  
21  
22  
23  
24  
25  
26  
27  
28  
29  
30  
31  
32  
33  
34  
35  
36  
37  
38  
39  
40  
41  
42  
43  
44  
45  
46  
47  
48  
49  
50  
51  
52  
53  
54  
55  
56  
57  
58  
59  
60

Figure 1: Food Resource Density by ZIP

For peer review only

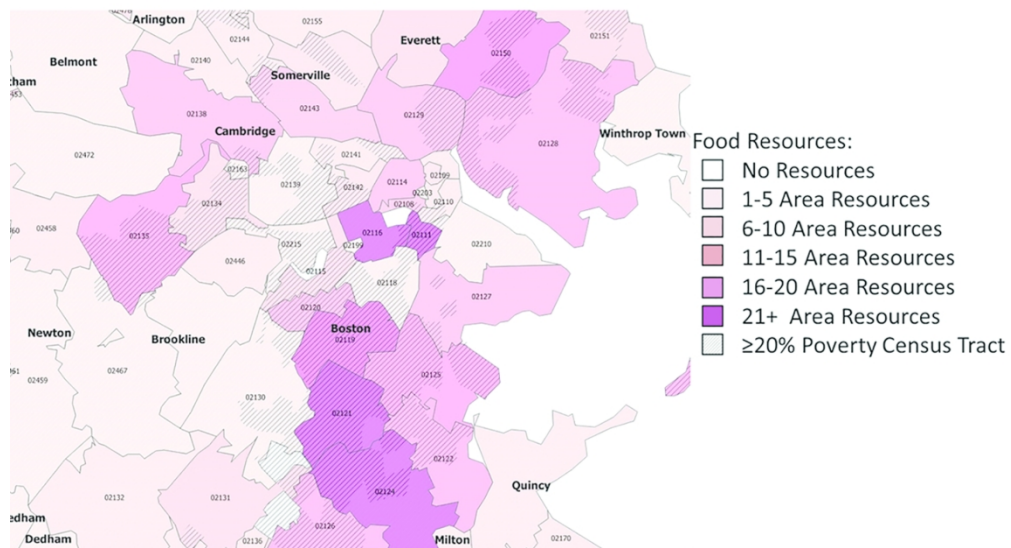

Figure 1

180x101mm (300 x 300 DPI)

1  
2  
3  
4  
5  
6  
7  
8  
9  
10  
11  
12  
13  
14  
15  
16  
17  
18  
19  
20  
21  
22  
23  
24  
25  
26  
27  
28  
29  
30  
31  
32  
33  
34  
35  
36  
37  
38  
39  
40  
41  
42  
43  
44  
45  
46  
47  
48  
49  
50  
51  
52  
53  
54  
55  
56  
57  
58  
59  
60

eAppendix for Association Between Area Resources and Cardiometabolic Risk: A Machine Learning and Multi-Level Modeling Analysis

For peer review only

## Technical Appendix

### VSURF

The foundation of the VSURF technique is the decision tree (eFigure 1).<sup>21</sup> To construct a single decision tree, the procedure selects a random subset of variables from the total number of available variables, and selects a variable that best explains the variation in outcome of a bootstrap resample drawn from the derivation sample. For the next split, the variable that best explains the variation within each ‘branch’ of the tree created in the first split is selected. This process is continued until optimal separation is achieved. A ‘forest’ is grown by repeating this process 2000 times, each time randomly drawing a subset of variables and bootstrap resample of the derivation cohort. In the VSURF procedure, 50 forests of 2000 trees were grown in the initial ‘thresholding’ step, which focuses on removing irrelevant variables. Then, 25 forests of 2000 trees, using the remaining variables, were grown to select all variables associated with the response. Finally, 25 forests of 2000 trees were grown, selecting among the remaining variables to eliminate redundancy. After all three steps were completed, we selected up to the top three area resources, as indicated by variable importance factors in the final step, for hypothesis testing in the independent, ‘testing’ sample.

A major advantage of VSURF is that it directly addresses the correlation among variables, as the single best variable is selected at each split and thus the explanatory power is not divided amongst two or more related variables, as in linear regression. Secondly, VSURF allows one to screen through a number of candidate variables while preserving type I error rate, as statistical

1  
2  
3  
4  
5  
6  
7  
8  
9  
10  
11  
12  
13  
14  
15  
16  
17  
18  
19  
20  
21  
22  
23  
24  
25  
26  
27  
28  
29  
30  
31  
32  
33  
34  
35  
36  
37  
38  
39  
40  
41  
42  
43  
44  
45  
46  
47  
48  
49  
50  
51  
52  
53  
54  
55  
56  
57  
58  
59  
60

significance testing is not used in the selection of variables, unlike p-value-based selection algorithms.

For peer review only

eFigure 1: Depiction of the Variable Selection Using Random Forest (VSURF) Method

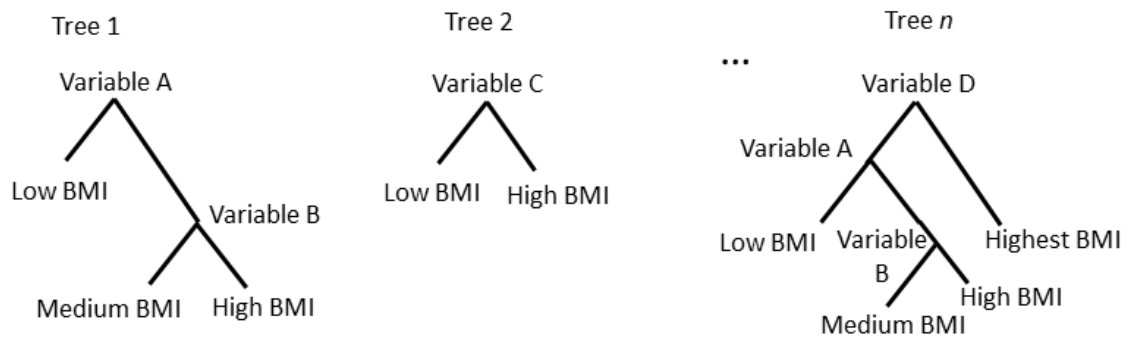

From a random subset of variables and a bootstrap resample of individuals in the derivation cohort, a decision tree that optimally splits the sample is created. This process is repeated in a second bootstrap resample with a second randomly selected subset of variables, and so on until  $n$  trees ( $n=2000$  in this study) are aggregated to create one forest. The forest-growing procedure is repeated 50 times. Then, using variable importance factors, which indicate the variables that are most useful in minimizing the error of predicted values in the 'out-of-bag' sample (those observations that, due to chance, were not selected in the bootstrap resample). After removing the least important variables, the entire process is repeated again, this time growing 25 forests of 2000 trees, in the 'interpretation' step, which focuses on selecting all variables associated with the response. Finally, to deal with correlations between variables, the process is repeated again, growing 25 more forests of 2000 trees, in the 'prediction' step, which focuses on removing redundancy in the final set of variables.



1  
2  
3  
4  
5  
6  
7  
8  
9  
10  
11  
12  
13  
14  
15  
16  
17  
18  
19  
20  
21  
22  
23  
24  
25  
26  
27  
28  
29  
30  
31  
32  
33  
34  
35  
36  
37  
38  
39  
40  
41  
42  
43  
44  
45  
46  
47  
48  
49  
50  
51  
52  
53  
54  
55  
56  
57  
58  
59  
60

eFigure 2: Employment Resources by ZIP

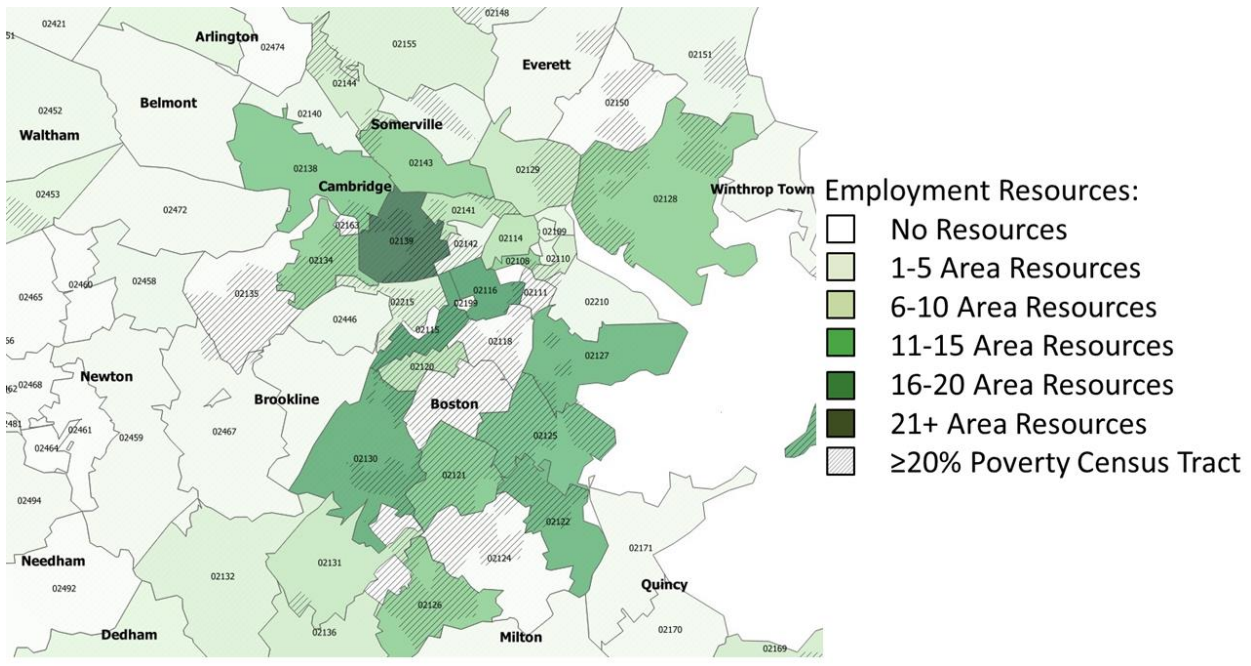

Review only

eFigure 3: Nutrition Resources by ZIP

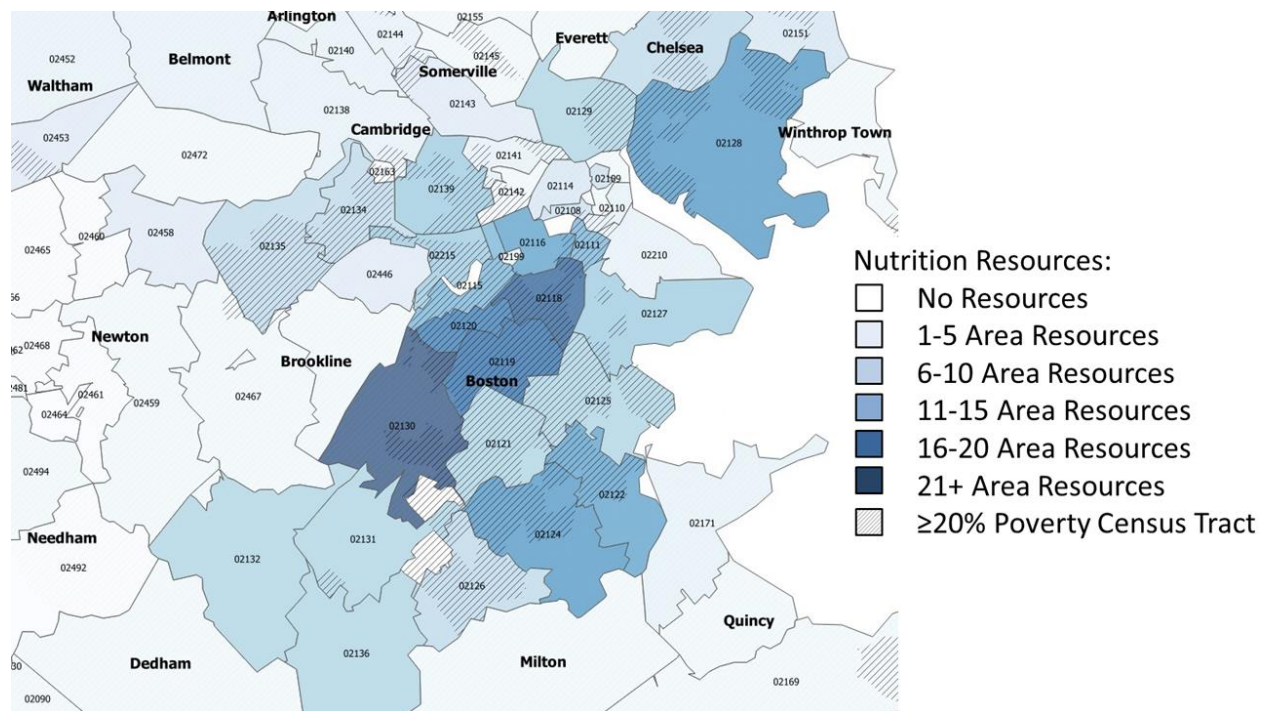

review only

eTable 1: Demographics for Hypertension Study Sample

|                                       | N=43,509            |
|---------------------------------------|---------------------|
|                                       | Mean (SD) or n (%)  |
| Age                                   | 64.67 (14.05)       |
| Male                                  | 21299 (49.0)        |
| Race/ethnicity                        |                     |
| Asian/Multi/Other                     | 1755 (4.0)          |
| Non-Hispanic Black                    | 3138 (7.2)          |
| Hispanic                              | 1983 (4.6)          |
| Non-Hispanic White                    | 36633 (84.2)        |
| Education                             |                     |
| College or >                          | 15660 (36.0)        |
| High School Diploma                   | 15900 (36.5)        |
| Less than High School Diploma         | 7422 (17.1)         |
| Unknown/Declined                      | 4527 (10.4)         |
| Insurance                             |                     |
| Private                               | 17256 (39.7)        |
| Medicare and Medicaid                 | 6200 (14.2)         |
| Medicaid                              | 6292 (14.5)         |
| Medicare                              | 13756 (31.6)        |
| Self-pay                              | 5 (0.0)             |
| English is Primary Language           | 39492 (90.8)        |
| History of Coronary Heart Disease     | 8373 (19.2)         |
| History of Diabetes Mellitus          | 11085 (25.5)        |
| History of Depression                 | 4745 (10.9)         |
| History of Osteoarthritis             | 14931 (34.3)        |
| Charlson Comorbidity Score            | 3.22 (2.57)         |
| Clinic Visits                         | 9.58 (6.77)         |
| Clinic Connectedness                  |                     |
| Connected to specific physician       | 36233 (83.3)        |
| Connected to specific practice        | 6978 (16.0)         |
| Other                                 | 298 (0.7)           |
| Lives in Urban Area                   | 32075 (96.4)        |
| ZIP-level Unemployment Rate, %        | 4.85 (1.63)         |
| ZIP-level Median Household Income, \$ | 80247.61 (31190.75) |
| ZIP-level Poverty Rate, %             | 8.67 (6.63)         |
| ZIP-level Segregation                 | 69.19 (21.92)       |
| Body Mass Index, kg/m <sup>2</sup>    | 29.68 (6.40)        |
| History of Obesity                    | 19314 (45.2)        |
| Systolic Blood Pressure, mm Hg        | 131.60 (15.75)      |

|                        |                |
|------------------------|----------------|
| LDL cholesterol, mg/dL | 102.73 (39.82) |
| Hemoglobin A1c, %      | 6.25 (1.34)    |

For peer review only

eTable 2: Demographics for LDL Study Sample

|                                       | N=46940             |
|---------------------------------------|---------------------|
|                                       | Mean (SD) or n (%)  |
| Age                                   | 63.96 (14.33)       |
| Male                                  | 22916 (48.8)        |
| Race/ethnicity                        |                     |
| Asian/Multi/Other                     | 1971 (4.2)          |
| Non-Hispanic Black                    | 3401 (7.2)          |
| Hispanic                              | 2285 (4.9)          |
| Non-Hispanic White                    | 39283 (83.7)        |
| Education                             |                     |
| College or >                          | 16940 (36.1)        |
| High School Diploma                   | 17032 (36.3)        |
| Less than High School Diploma         | 8075 (17.2)         |
| Unknown/Declined                      | 4893 (10.4)         |
| Insurance                             |                     |
| Private                               | 18909 (40.3)        |
| Medicare and Medicaid                 | 6561 (14.0)         |
| Medicaid                              | 7169 (15.3)         |
| Medicare                              | 14296 (30.5)        |
| Self-pay                              | 5 (0.0)             |
| English is Primary Language           | 42468 (90.5)        |
| History of Hypertension               | 43509 (92.7)        |
| History of Coronary Heart Disease     | 9275 (19.8)         |
| History of Diabetes Mellitus          | 13127 (28.0)        |
| History of Depression                 | 5160 (11.0)         |
| History of Osteoarthritis             | 15695 (33.4)        |
| Charlson Comorbidity Score            | 3.14 (2.54)         |
| Clinic Visits                         | 9.46 (6.71)         |
| Clinic Connectedness                  |                     |
| Connected to specific physician       | 38851 (82.8)        |
| Connected to specific practice        | 7746 (16.5)         |
| Other                                 | 343 (0.7)           |
| Lives in Urban Area                   | 34532 (96.4)        |
| ZIP-level Unemployment Rate, %        | 4.86 (1.63)         |
| ZIP-level Median Household Income, \$ | 80079.26 (31173.63) |
| ZIP-level Poverty Rate, %             | 8.72 (6.64)         |
| ZIP-level Segregation                 | 68.98 (21.98)       |
| Body Mass Index, kg/m <sup>2</sup>    | 29.63 (6.42)        |
| History of Obesity                    | 20611 (44.7)        |
| Systolic Blood Pressure, mm Hg        | 130.88 (15.75)      |

|                        |                |
|------------------------|----------------|
| LDL cholesterol, mg/dL | 102.85 (39.81) |
| Hemoglobin A1c, %      | 6.28 (1.36)    |

For peer review only

eTable 3: Demographics for Diabetes Study Sample

|                                       | N=13127             |
|---------------------------------------|---------------------|
|                                       | Mean (SD) or n (%)  |
| Age                                   | 64.12 (14.10)       |
| Male                                  | 6722 (51.2)         |
| Race/ethnicity                        |                     |
| Asian/Multi/Other                     | 729 (5.6)           |
| Non-Hispanic Black                    | 1415 (10.8)         |
| Hispanic                              | 986 (7.5)           |
| Non-Hispanic White                    | 9995 (76.1)         |
| Education                             |                     |
| College or >                          | 3691 (28.1)         |
| High School Diploma                   | 5115 (39.0)         |
| Less than High School Diploma         | 3085 (23.5)         |
| Unknown/Declined                      | 1236 (9.4)          |
| Insurance                             |                     |
| Private                               | 4247 (32.4)         |
| Medicare and Medicaid                 | 2609 (19.9)         |
| Medicaid                              | 2654 (20.2)         |
| Medicare                              | 3617 (27.6)         |
| Self-pay                              | 0 (0.0)             |
| English is Primary Language           | 11138 (84.8)        |
| History of Hypertension               | 11085 (84.4)        |
| History of Coronary Heart Disease     | 3316 (25.3)         |
| History of Diabetes Mellitus          | 13127 (100.0)       |
| History of Depression                 | 1685 (12.8)         |
| History of Osteoarthritis             | 4605 (35.1)         |
| Charlson Comorbidity Score            | 4.34 (2.94)         |
| Clinic Visits                         | 11.59 (7.52)        |
| Clinic Connectedness                  |                     |
| Connected to specific physician       | 10778 (82.1)        |
| Connected to specific practice        | 2234 (17.0)         |
| Other                                 | 115 (0.9)           |
| Lives in Urban Area                   | 9467 (97.4)         |
| ZIP-level Unemployment Rate, %        | 5.24 (1.67)         |
| ZIP-level Median Household Income, \$ | 72660.30 (28239.05) |
| ZIP-level Poverty Rate, %             | 10.19 (6.83)        |
| ZIP-level Segregation                 | 63.62 (23.80)       |
| Body Mass Index, kg/m <sup>2</sup>    | 31.48 (6.85)        |
| History of Obesity                    | 7427 (57.7)         |
| Systolic Blood Pressure, mm Hg        | 130.17 (16.09)      |

|                        |               |
|------------------------|---------------|
| LDL cholesterol, mg/dL | 89.25 (37.45) |
| Hemoglobin A1c, %      | 7.08 (1.52)   |

For peer review only



eTable 4: Demographics of study sample by number of food resources in ZIP code tabulation area

|                                       | 0 food resources    | 1 to 7 food resources | ≥8 food resources   | p      |
|---------------------------------------|---------------------|-----------------------|---------------------|--------|
|                                       | N=65011             | N=42794               | N=13028             |        |
|                                       | Mean (SD) or n (%)  | Mean (SD) or n (%)    | Mean (SD) or n (%)  |        |
| Age                                   | 53.93 (16.13)       | 51.05 (17.69)         | 47.95 (16.92)       | <0.001 |
| Male                                  | 28050 (43.1)        | 17330 (40.5)          | 5163 (39.6)         | <0.001 |
| Race/ethnicity                        |                     |                       |                     | <0.001 |
| Asian/Multi/Other                     | 3559 (5.5)          | 2501 (5.8)            | 709 (5.4)           |        |
| Non-Hispanic Black                    | 2553 (3.9)          | 2710 (6.3)            | 1605 (12.3)         |        |
| Hispanic                              | 2306 (3.5)          | 2859 (6.7)            | 2707 (20.8)         |        |
| Non-Hispanic White                    | 56593 (87.1)        | 34724 (81.1)          | 8007 (61.5)         |        |
| Education                             |                     |                       |                     | <0.001 |
| College or >                          | 31782 (48.9)        | 18895 (44.2)          | 4837 (37.1)         |        |
| High School Diploma                   | 18400 (28.3)        | 13355 (31.2)          | 3767 (28.9)         |        |
| Less than High School Diploma         | 7373 (11.3)         | 6762 (15.8)           | 3449 (26.5)         |        |
| Unknown/Declined                      | 7456 (11.5)         | 3782 (8.8)            | 975 (7.5)           |        |
| Insurance                             |                     |                       |                     | <0.001 |
| Private                               | 44051 (67.8)        | 24062 (56.2)          | 6600 (50.7)         |        |
| Medicare and Medicaid                 | 3485 (5.4)          | 3551 (8.3)            | 1188 (9.1)          |        |
| Medicaid                              | 7319 (11.3)         | 9011 (21.1)           | 4075 (31.3)         |        |
| Medicare                              | 10128 (15.6)        | 6093 (14.2)           | 1149 (8.8)          |        |
| Self-pay                              | 28 (0.0)            | 77 (0.2)              | 16 (0.1)            |        |
| English is Primary Language           | 61559 (94.7)        | 38982 (91.1)          | 9923 (76.2)         | <0.001 |
| History of Hypertension               | 22195 (34.1)        | 15367 (35.9)          | 4342 (33.3)         | <0.001 |
| History of Coronary Heart Disease     | 4663 (7.2)          | 3385 (7.9)            | 817 (6.3)           | <0.001 |
| History of Cerebrovascular Disease    | 1628 (2.5)          | 1148 (2.7)            | 316 (2.4)           | 0.114  |
| History of Congestive Heart Failure   | 1941 (3.0)          | 1793 (4.2)            | 460 (3.5)           | <0.001 |
| History of Diabetes Mellitus          | 5735 (8.8)          | 4757 (11.1)           | 1735 (13.3)         | <0.001 |
| History of Depression                 | 4598 (7.1)          | 4024 (9.4)            | 1377 (10.6)         | <0.001 |
| History of Osteoarthritis             | 12179 (18.7)        | 8386 (19.6)           | 2331 (17.9)         | <0.001 |
| Charlson Comorbidity Score            | 1.70 (2.17)         | 1.72 (2.28)           | 1.56 (2.15)         | <0.001 |
| Clinic Visits                         | 5.93 (5.18)         | 7.14 (6.21)           | 7.19 (6.11)         | <0.001 |
| Clinic Connectedness                  |                     |                       |                     | <0.001 |
| Connected to specific physician       | 41292 (63.5)        | 28457 (66.5)          | 8593 (66.0)         |        |
| Connected to specific practice        | 14727 (22.7)        | 14337 (33.5)          | 4435 (34.0)         |        |
| Other                                 | 8992 (13.8)         | 0 (0.0)               | 0 (0.0)             |        |
| Lives in Urban Area                   | 52165 (94.3)        | 29291 (99.4)          | 7118 (99.9)         | <0.001 |
| ZIP-level Unemployment Rate, %        | 4.27 (1.41)         | 4.89 (1.51)           | 5.82 (1.83)         | <0.001 |
| ZIP-level Median Household Income, \$ | 96937.11 (34242.61) | 71648.83 (21514.21)   | 58606.22 (17651.59) | <0.001 |

|                                    |                |                |                |        |
|------------------------------------|----------------|----------------|----------------|--------|
| ZIP-level Poverty Rate, %          | 4.91 (4.58)    | 11.12 (6.26)   | 15.94 (5.58)   | <0.001 |
| ZIP-level Segregation              | 80.59 (15.85)  | 65.17 (15.29)  | 39.16 (20.13)  | <0.001 |
| Body Mass Index, kg/m <sup>2</sup> | 27.64 (6.03)   | 27.82 (6.34)   | 28.30 (6.63)   | <0.001 |
| History of Obesity                 | 18693 (30.1)   | 12765 (30.8)   | 4148 (33.2)    | <0.001 |
| Systolic Blood Pressure, mm Hg     | 124.47 (14.92) | 124.27 (15.03) | 123.44 (14.80) | <0.001 |
| LDL cholesterol, mg/dL             | 112.17 (42.48) | 109.92 (37.14) | 108.83 (35.34) | <0.001 |
| Hemoglobin A1c, %                  | 5.86 (1.12)    | 5.98 (1.25)    | 6.13 (1.43)    | <0.001 |

For peer review only

## Robustness checks (eTable 5-7)

Results from analyses, adjusted for the same factors as in main model presented in the manuscript, comparing the association of food resources and BMI with different specifications of ZIP-level food resources (count, count per capita, and count per capita living in poverty) show that the association between more area food resources and lower BMI is robust to different specifications of number of resources

eTable 5: Analyses comparing the association of food resources and BMI with different specifications of area-resources

| Estimated difference in BMI associated with 1 additional ZIP-level resource (95% CI), kg/m <sup>2</sup> (main model from manuscript) | Estimated difference in BMI associated with 1 additional ZIP-level resource per 10000 people (95% CI), kg/m <sup>2</sup> | Estimated difference in BMI associated with 1 additional ZIP-level resource per 10000 people living in poverty (95% CI), kg/m <sup>2</sup> |
|--------------------------------------------------------------------------------------------------------------------------------------|--------------------------------------------------------------------------------------------------------------------------|--------------------------------------------------------------------------------------------------------------------------------------------|
| -0.08 (-0.13 to -0.03)                                                                                                               | -0.19 (-0.29 to -0.085)                                                                                                  | -0.02 (-0.03 to -0.01)                                                                                                                     |

Analyses, adjusted for the same factors as in main model presented in the manuscript, including a quadratic and/or cubic term, or restricted cubic splines, to represent the number of ZIP-level resources resulted in worse model fit by Akaike information criterion and Bayes information criterion, suggesting that a linear approximation of the relationship between ZIP-level resources and the modeled outcome is reasonable.

| eTable 6: Model fit statistics from different specifications of ZIP-level food resources |                                                              |                                                             |
|------------------------------------------------------------------------------------------|--------------------------------------------------------------|-------------------------------------------------------------|
|                                                                                          | Akaike information criterion (smaller represents better fit) | Bayes information criterion (smaller represents better fit) |
| Linear term only                                                                         | 468646.6                                                     | 468640.6                                                    |
| Linear plus quadratic                                                                    | 468656.5                                                     | 468650.5                                                    |
| Linear, quadratic, and cubic                                                             | 468667.8                                                     | 468661.8                                                    |
| Restricted cubic spline                                                                  | 468656.0                                                     | 468650.0                                                    |

Analyses, adjusted for the same factors as in main model presented in the manuscript, restricted to those with indicators of lower socioeconomic status show that the estimates for the association between additional ZIP-level food resources and BMI are slightly larger than in the overall population, which is consistent with the idea that these resources are beneficial for those with lower socioeconomic status

eTable 7: Analyses of association between ZIP-level food resources and body mass index, restricted to those with indicators of lower socioeconomic status

| Estimated difference in BMI associated with 1 additional ZIP-level resource (95% CI), kg/m <sup>2</sup> (main model from manuscript) | Estimated difference in BMI associated with 1 additional ZIP-level resource (95% CI), restricted to those with high school diploma or lower educational attainment, kg/m <sup>2</sup> | Estimated difference in BMI associated with 1 additional ZIP-level resource (95% CI), restricted to those living in ZIP with > 15% living in poverty, kg/m <sup>2</sup> |
|--------------------------------------------------------------------------------------------------------------------------------------|---------------------------------------------------------------------------------------------------------------------------------------------------------------------------------------|-------------------------------------------------------------------------------------------------------------------------------------------------------------------------|
| -0.08 (-0.13 to -0.03)                                                                                                               | -0.09 (-0.15 to -0.04)                                                                                                                                                                | -0.11 (-0.17 to -0.06)                                                                                                                                                  |

For peer review only

eTable 8: Full models for association between ZIP-level food resources and body mass index

|                                   | Estimate  | Standard Error | p-value | Lower 95% Confidence Interval | Upper 95% Confidence Interval |
|-----------------------------------|-----------|----------------|---------|-------------------------------|-------------------------------|
| Intercept                         | 28.2196   | 1.1796         | <.0001  | 25.9071                       | 30.5320                       |
| ZIP-level food resources          | -0.08429  | 0.02512        | 0.0010  | -0.1340                       | -0.03460                      |
| ZIP-level afterschool resources   | 0.009484  | 0.02203        | 0.6674  | -0.03404                      | 0.05301                       |
| Age, years                        | -0.04950  | 0.002011       | <.0001  | -0.05344                      | -0.04556                      |
| Female                            | -1.3794   | 0.04395        | <.0001  | -1.4656                       | -1.2933                       |
| Race/ethnicity                    |           |                |         |                               |                               |
| Asian/Multi/Other                 | -2.5117   | 0.09328        | <.0001  | -2.6945                       | -2.3288                       |
| Non-Hispanic Black                | 0.9600    | 0.09753        | <.0001  | 0.7688                        | 1.1511                        |
| Hispanic                          | 0.7277    | 0.1081         | <.0001  | 0.5157                        | 0.9396                        |
| Non-Hispanic White                | reference | n/a            | n/a     | n/a                           | n/a                           |
| Education                         |           |                |         |                               |                               |
| College or >                      | -0.2793   | 0.07082        | <.0001  | -0.4181                       | -0.1404                       |
| High School Diploma               | 0.09622   | 0.07549        | 0.2025  | -0.05175                      | 0.2442                        |
| Less than High School Diploma     | 0.3871    | 0.09117        | <.0001  | 0.2084                        | 0.5658                        |
| Unknown/Declined                  | reference | n/a            | n/a     | n/a                           | n/a                           |
| Insurance                         |           |                |         |                               |                               |
| Private                           | 0.1890    | 1.0208         | 0.8531  | -1.8118                       | 2.1898                        |
| Medicare and Medicaid             | 0.06964   | 1.0240         | 0.9458  | -1.9374                       | 2.0767                        |
| Medicaid                          | 0.6961    | 1.0215         | 0.4956  | -1.3061                       | 2.6983                        |
| Medicaid                          | -0.4968   | 1.0230         | 0.6272  | -2.5019                       | 1.5083                        |
| Self-pay                          | reference | n/a            | n/a     | n/a                           | n/a                           |
| English is Primary Language       | 0.7128    | 0.09604        | <.0001  | 0.5246                        | 0.9011                        |
| History of Hypertension           | 2.7291    | 0.05550        | <.0001  | 2.6203                        | 2.8379                        |
| History of Coronary Heart Disease | -0.4141   | 0.08601        | <.0001  | -0.5827                       | -0.2455                       |
| History of Diabetes Mellitus      | 2.4217    | 0.07471        | <.0001  | 2.2752                        | 2.5681                        |

eTable 8: Full models for association between ZIP-level food resources and body mass index

|                                             | Estimate  | Standard Error | p-value | Lower 95% Confidence Interval | Upper 95% Confidence Interval |
|---------------------------------------------|-----------|----------------|---------|-------------------------------|-------------------------------|
| History of Depression                       | 0.5488    | 0.07350        | <.0001  | 0.4048                        | 0.6929                        |
| History of Osteoarthritis                   | 1.3188    | 0.05467        | <.0001  | 1.2116                        | 1.4260                        |
| Charlson Comorbidity Score                  | 0.06713   | 0.01268        | <.0001  | 0.04227                       | 0.09198                       |
| Clinic Visits                               | -0.00068  | 0.004383       | 0.8770  | -0.00927                      | 0.007911                      |
| Clinic Connectedness                        |           |                |         |                               |                               |
| Connected to specific physician             | 0.3184    | 0.05024        | <.0001  | 0.2200                        | 0.4169                        |
| Connected to specific practice              | reference | n/a            | n/a     | n/a                           | n/a                           |
| Lives in Urban Area                         | 0.2640    | 0.1580         | 0.0949  | -0.04583                      | 0.5739                        |
| Lives in Area with Low Physical Food Access | 0.09426   | 0.07794        | 0.2265  | -0.05851                      | 0.2470                        |
| Percentage of Area Living in Group Quarters | -0.00020  | 0.000060       | 0.0009  | -0.00032                      | -0.00008                      |
| Lives in Area with Low Vehicle Access       | 0.1189    | 0.05577        | 0.0331  | 0.009564                      | 0.2282                        |
| ZIP-level Unemployment Rate                 | 0.2608    | 0.03829        | <.0001  | 0.1855                        | 0.3361                        |
| ZIP-level Median Household Income           | -0.00001  | 1.936E-6       | <.0001  | -0.00002                      | -8.81E-6                      |
| ZIP-level Poverty Rate                      | -0.03254  | 0.01370        | 0.0183  | -0.05952                      | -0.00555                      |
| ZIP-level Segregation                       | 0.002536  | 0.003897       | 0.5158  | -0.00514                      | 0.01021                       |

eTable 9: Full models for association between ZIP-level employment resources and body mass index

|                                | Estimate | Standard Error | p-value | Lower 95% Confidence Interval | Upper 95% Confidence Interval |
|--------------------------------|----------|----------------|---------|-------------------------------|-------------------------------|
| Intercept                      | 28.1779  | 1.1847         | <.0001  | 25.8554                       | 30.5004                       |
| ZIP-level employment resources | -0.05415 | 0.02624        | 0.0407  | -0.1060                       | -0.00231                      |

eTable 9: Full models for association between ZIP-level employment resources and body mass index

|                                   | Estimate  | Standard Error | p-value | Lower 95% Confidence Interval | Upper 95% Confidence Interval |
|-----------------------------------|-----------|----------------|---------|-------------------------------|-------------------------------|
| ZIP-level afterschool resources   | 0.01083   | 0.03215        | 0.7366  | -0.05269                      | 0.07436                       |
| Age, years                        | -0.04951  | 0.002011       | <.0001  | -0.05345                      | -0.04557                      |
| Female                            | -1.3795   | 0.04395        | <.0001  | -1.4656                       | -1.2933                       |
| Race/ethnicity                    |           |                |         |                               |                               |
| Asian/Multi/Other                 | -2.5089   | 0.09330        | <.0001  | -2.6918                       | -2.3260                       |
| Non-Hispanic Black                | 0.9669    | 0.09755        | <.0001  | 0.7757                        | 1.1581                        |
| Hispanic                          | 0.7300    | 0.1081         | <.0001  | 0.5181                        | 0.9420                        |
| Non-Hispanic White                | reference | n/a            | n/a     | n/a                           | n/a                           |
| Education                         |           |                |         |                               |                               |
| College or >                      | -0.2787   | 0.07083        | <.0001  | -0.4175                       | -0.1399                       |
| High School Diploma               | 0.09646   | 0.07549        | 0.2013  | -0.05150                      | 0.2444                        |
| Less than High School Diploma     | 0.3880    | 0.09117        | <.0001  | 0.2093                        | 0.5667                        |
| Unknown/Declined                  | reference | n/a            | n/a     | n/a                           | n/a                           |
| Insurance                         |           |                |         |                               |                               |
| Private                           | 0.1930    | 1.0208         | 0.8500  | -1.8078                       | 2.1938                        |
| Medicare and Medicaid             | 0.07527   | 1.0240         | 0.9414  | -1.9318                       | 2.0823                        |
| Medicaid                          | 0.7010    | 1.0215         | 0.4926  | -1.3012                       | 2.7032                        |
| Medicaid                          | -0.4922   | 1.0230         | 0.6304  | -2.4973                       | 1.5128                        |
| Self-pay                          | reference | n/a            | n/a     | n/a                           | n/a                           |
| English is Primary Language       | 0.7126    | 0.09604        | <.0001  | 0.5243                        | 0.9008                        |
| History of Hypertension           | 2.7296    | 0.05550        | <.0001  | 2.6208                        | 2.8383                        |
| History of Coronary Heart Disease | -0.4138   | 0.08601        | <.0001  | -0.5824                       | -0.2452                       |
| History of Diabetes Mellitus      | 2.4215    | 0.07471        | <.0001  | 2.2751                        | 2.5680                        |
| History of Depression             | 0.5493    | 0.07350        | <.0001  | 0.4052                        | 0.6933                        |
| History of Osteoarthritis         | 1.3190    | 0.05467        | <.0001  | 1.2118                        | 1.4261                        |

eTable 9: Full models for association between ZIP-level employment resources and body mass index

|                                             | Estimate  | Standard Error | p-value | Lower 95% Confidence Interval | Upper 95% Confidence Interval |
|---------------------------------------------|-----------|----------------|---------|-------------------------------|-------------------------------|
| Charlson Comorbidity Score                  | 0.06713   | 0.01268        | <.0001  | 0.04227                       | 0.09198                       |
| Clinic Visits                               | -0.00069  | 0.004383       | 0.8744  | -0.00928                      | 0.007897                      |
| Clinic Connectedness                        |           |                |         |                               |                               |
| Connected to specific physician             | 0.3181    | 0.05024        | <.0001  | 0.2197                        | 0.4166                        |
| Connected to specific practice              | reference | n/a            | n/a     | n/a                           | n/a                           |
| Lives in Urban Area                         | 0.2569    | 0.1589         | 0.1059  | -0.05456                      | 0.5684                        |
| Lives in Area with Low Physical Food Access | 0.09945   | 0.07799        | 0.2023  | -0.05342                      | 0.2523                        |
| Percentage of Area Living in Group Quarters | -0.00019  | 0.000060       | 0.0013  | -0.00031                      | -0.00008                      |
| Lives in Area with Low Vehicle Access       | 0.1198    | 0.05586        | 0.0320  | 0.01027                       | 0.2293                        |
| ZIP-level Unemployment Rate                 | 0.2601    | 0.03946        | <.0001  | 0.1825                        | 0.3377                        |
| ZIP-level Median Household Income           | -0.00001  | 1.988E-6       | <.0001  | -0.00002                      | -8.84E-6                      |
| ZIP-level Poverty Rate                      | -0.03147  | 0.01401        | 0.0255  | -0.05905                      | -0.00389                      |
| ZIP-level Segregation                       | 0.003079  | 0.003968       | 0.4385  | -0.00473                      | 0.01089                       |



eTable 10: Full models for association between ZIP-level nutrition resources and body mass index

|                                   | Estimate  | Standard Error | p-value | Lower 95% Confidence Interval | Upper 95% Confidence Interval |
|-----------------------------------|-----------|----------------|---------|-------------------------------|-------------------------------|
| Intercept                         | 28.1161   | 1.1836         | <.0001  | 25.7958                       | 30.4364                       |
| ZIP-level nutrition resources     | -0.07146  | 0.03122        | 0.0234  | -0.1331                       | -0.00980                      |
| ZIP-level afterschool resources   | 0.002639  | 0.02650        | 0.9208  | -0.04967                      | 0.05495                       |
| Age, years                        | -0.04949  | 0.002011       | <.0001  | -0.05344                      | -0.04555                      |
| Female                            | -1.3792   | 0.04395        | <.0001  | -1.4654                       | -1.2931                       |
| Race/ethnicity                    |           |                |         |                               |                               |
| Asian/Multi/Other                 | -2.5116   | 0.09329        | <.0001  | -2.6944                       | -2.3287                       |
| Non-Hispanic Black                | 0.9650    | 0.09756        | <.0001  | 0.7738                        | 1.1562                        |
| Hispanic                          | 0.7272    | 0.1081         | <.0001  | 0.5152                        | 0.9392                        |
| Non-Hispanic White                | reference | n/a            | n/a     | n/a                           | n/a                           |
| Education                         |           |                |         |                               |                               |
| College or >                      | -0.2787   | 0.07082        | <.0001  | -0.4175                       | -0.1399                       |
| High School Diploma               | 0.09695   | 0.07549        | 0.1991  | -0.05102                      | 0.2449                        |
| Less than High School Diploma     | 0.3870    | 0.09117        | <.0001  | 0.2083                        | 0.5657                        |
| Unknown/Declined                  | reference | n/a            | n/a     | n/a                           | n/a                           |
| Insurance                         |           |                |         |                               |                               |
| Private                           | 0.1858    | 1.0208         | 0.8555  | -1.8150                       | 2.1866                        |
| Medicare and Medicaid             | 0.06642   | 1.0240         | 0.9483  | -1.9406                       | 2.0735                        |
| Medicaid                          | 0.6927    | 1.0215         | 0.4977  | -1.3095                       | 2.6948                        |
| Medicaid                          | -0.5000   | 1.0230         | 0.6250  | -2.5050                       | 1.5051                        |
| Self-pay                          | reference | n/a            | n/a     | n/a                           | n/a.                          |
| English is Primary Language       | 0.7143    | 0.09604        | <.0001  | 0.5261                        | 0.9026                        |
| History of Hypertension           | 2.7290    | 0.05550        | <.0001  | 2.6202                        | 2.8378                        |
| History of Coronary Heart Disease | -0.4139   | 0.08601        | <.0001  | -0.5825                       | -0.2453                       |
| History of Diabetes Mellitus      | 2.4211    | 0.07471        | <.0001  | 2.2747                        | 2.5676                        |

eTable 10: Full models for association between ZIP-level nutrition resources and body mass index

|                                             | Estimate  | Standard Error | p-value | Lower 95% Confidence Interval | Upper 95% Confidence Interval |
|---------------------------------------------|-----------|----------------|---------|-------------------------------|-------------------------------|
| History of Depression                       | 0.5484    | 0.07350        | <.0001  | 0.4044                        | 0.6925                        |
| History of Osteoarthritis                   | 1.3187    | 0.05467        | <.0001  | 1.2115                        | 1.4259                        |
| Charlson Comorbidity Score                  | 0.06712   | 0.01268        | <.0001  | 0.04227                       | 0.09197                       |
| Clinic Visits                               | -0.00069  | 0.004383       | 0.8750  | -0.00928                      | 0.007900                      |
| Clinic Connectedness                        |           |                |         |                               |                               |
| Connected to specific physician             | 0.3185    | 0.05024        | <.0001  | 0.2200                        | 0.4170                        |
| Connected to specific practice              | reference | n/a            | n/a     | n/a                           | n/a.                          |
| Lives in Urban Area                         | 0.2529    | 0.1588         | 0.1113  | -0.05838                      | 0.5642                        |
| Lives in Area with Low Physical Food Access | 0.1009    | 0.07792        | 0.1955  | -0.05185                      | 0.2536                        |
| Percentage of Area Living in Group Quarters | -0.00020  | 0.000060       | 0.0009  | -0.00032                      | -0.00008                      |
| Lives in Area with Low Vehicle Access       | 0.1176    | 0.05585        | 0.0352  | 0.008130                      | 0.2271                        |
| ZIP-level Unemployment Rate                 | 0.2684    | 0.03881        | <.0001  | 0.1921                        | 0.3447                        |
| ZIP-level Median Household Income           | -0.00001  | 1.972E-6       | <.0001  | -0.00002                      | -8.48E-6                      |
| ZIP-level Poverty Rate                      | -0.03270  | 0.01396        | 0.0199  | -0.06020                      | -0.00521                      |
| ZIP-level Segregation                       | 0.003113  | 0.003967       | 0.4332  | -0.00470                      | 0.01092                       |

eTable 11: Full models for association between ZIP-level housing resources and systolic blood pressure

|                                   | Estimate  | Standard Error | p-value | Lower 95% Confidence Interval | Upper 95% Confidence Interval |
|-----------------------------------|-----------|----------------|---------|-------------------------------|-------------------------------|
| Intercept                         | 115.70    | 11.1188        | <.0001  | 93.9116                       | 137.50                        |
| ZIP-level housing resources       | -0.04612  | 0.05585        | 0.4106  | -0.1567                       | 0.06446                       |
| ZIP-level afterschool resources   | -0.03286  | 0.04586        | 0.4755  | -0.1240                       | 0.05828                       |
| Age, years                        | 0.1521    | 0.009429       | <.0001  | 0.1337                        | 0.1706                        |
| Female                            | -0.6839   | 0.1930         | 0.0004  | -1.0622                       | -0.3055                       |
| Race/ethnicity                    |           |                |         |                               |                               |
| Asian/Multi/Other                 | -1.2014   | 0.4952         | 0.0153  | -2.1720                       | -0.2308                       |
| Non-Hispanic Black                | 2.8013    | 0.3960         | <.0001  | 2.0251                        | 3.5774                        |
| Hispanic                          | 0.5064    | 0.5619         | 0.3675  | -0.5950                       | 1.6078                        |
| Non-Hispanic White                | reference | n/a            | n/a     | n/a                           | n/a.                          |
| Education                         |           |                |         |                               |                               |
| College or >                      | 0.02428   | 0.3181         | 0.9392  | -0.5992                       | 0.6478                        |
| High School Diploma               | 0.1732    | 0.3236         | 0.5924  | -0.4610                       | 0.8074                        |
| Less than High School Diploma     | 0.6220    | 0.3914         | 0.1121  | -0.1452                       | 1.3893                        |
| Unknown/Declined                  | reference | n/a            | n/a     | n/a                           | n/a.                          |
| Insurance                         |           |                |         |                               |                               |
| Private                           | 8.3527    | 10.9765        | 0.4467  | -13.1616                      | 29.8671                       |
| Medicare and Medicaid             | 7.8728    | 10.9784        | 0.4733  | -13.6453                      | 29.3910                       |
| Medicaid                          | 8.5660    | 10.9772        | 0.4352  | -12.9499                      | 30.0818                       |
| Medicaid                          | 8.4728    | 10.9781        | 0.4402  | -13.0447                      | 29.9903                       |
| Self-pay                          | reference | n/a            | n/a     | n/a                           | n/a.                          |
| English is Primary Language       | -0.01463  | 0.4091         | 0.9715  | -0.8165                       | 0.7873                        |
| History of Coronary Heart Disease | -2.7190   | 0.2620         | <.0001  | -3.2325                       | -2.2055                       |
| History of Diabetes Mellitus      | 0.1079    | 0.2325         | 0.6426  | -0.3478                       | 0.5635                        |
| History of Depression             | -0.9568   | 0.3076         | 0.0019  | -1.5596                       | -0.3539                       |

eTable 11: Full models for association between ZIP-level housing resources and systolic blood pressure

|                                             | Estimate  | Standard Error | p-value | Lower 95% Confidence Interval | Upper 95% Confidence Interval |
|---------------------------------------------|-----------|----------------|---------|-------------------------------|-------------------------------|
| History of Osteoarthritis                   | -0.5000   | 0.2009         | 0.0128  | -0.8939                       | -0.1062                       |
| Charlson Comorbidity Score                  | -0.05959  | 0.04502        | 0.1856  | -0.1478                       | 0.02865                       |
| Clinic Visits                               | -0.02840  | 0.01601        | 0.0760  | -0.05978                      | 0.002975                      |
| Clinic Connectedness                        |           |                |         |                               |                               |
| Connected to specific physician             | -1.9594   | 0.2580         | <.0001  | -2.4651                       | -1.4538                       |
| Connected to specific practice              | reference | n/a            | n/a     | n/a                           | n/a.                          |
| Lives in Urban Area                         | 0.2234    | 0.5896         | 0.7049  | -0.9332                       | 1.3799                        |
| Lives in Area with Low Physical Food Access | -0.6380   | 0.3321         | 0.0548  | -1.2892                       | 0.01327                       |
| Percentage of Area Living in Group Quarters | -0.00025  | 0.000262       | 0.3352  | -0.00077                      | 0.000261                      |
| Lives in Area with Low Vehicle Access       | 0.2689    | 0.2251         | 0.2324  | -0.1725                       | 0.7102                        |
| ZIP-level Unemployment Rate                 | 0.1919    | 0.1055         | 0.0702  | -0.01598                      | 0.3998                        |
| ZIP-level Median Household Income           | 5.33E-7   | 4.993E-6       | 0.9151  | -9.33E-6                      | 0.000010                      |
| ZIP-level Poverty Rate                      | 0.003603  | 0.03442        | 0.9168  | -0.06460                      | 0.07180                       |
| ZIP-level Segregation                       | -0.00127  | 0.01007        | 0.8999  | -0.02117                      | 0.01863                       |

eTable 12: Full models for association between ZIP-level nutrition resources and systolic blood pressure

|                                   | Estimate  | Standard Error | p-value | Lower 95% Confidence Interval | Upper 95% Confidence Interval |
|-----------------------------------|-----------|----------------|---------|-------------------------------|-------------------------------|
| Intercept                         | 115.52    | 11.1170        | <.0001  | 93.7336                       | 137.31                        |
| ZIP-level nutrition resources     | 0.01167   | 0.07270        | 0.8728  | -0.1325                       | 0.1559                        |
| ZIP-level afterschool resources   | -0.06660  | 0.05852        | 0.2582  | -0.1829                       | 0.04971                       |
| Age, years                        | 0.1522    | 0.009429       | <.0001  | 0.1337                        | 0.1707                        |
| Female                            | -0.6823   | 0.1930         | 0.0004  | -1.0606                       | -0.3039                       |
| Race/ethnicity                    |           |                |         |                               |                               |
| Asian/Multi/Other                 | -1.2077   | 0.4952         | 0.0147  | -2.1782                       | -0.2371                       |
| Non-Hispanic Black                | 2.7981    | 0.3960         | <.0001  | 2.0218                        | 3.5744                        |
| Hispanic                          | 0.5101    | 0.5622         | 0.3643  | -0.5919                       | 1.6120                        |
| Non-Hispanic White                | reference | n/a            | n/a     | n/a                           | n/a.                          |
| education                         |           |                |         |                               |                               |
| College or >                      | 0.01868   | 0.3181         | 0.9532  | -0.6048                       | 0.6421                        |
| High School Diploma               | 0.1716    | 0.3236         | 0.5958  | -0.4626                       | 0.8059                        |
| Less than High School Diploma     | 0.6218    | 0.3915         | 0.1122  | -0.1455                       | 1.3891                        |
| Unknown/Declined                  | reference | n/a            | n/a     | n/a                           | n/a.                          |
| Insurance                         |           |                |         |                               |                               |
| Private                           | 8.3894    | 10.9765        | 0.4447  | -13.1251                      | 29.9038                       |
| Medicare and Medicaid             | 7.9053    | 10.9784        | 0.4715  | -13.6130                      | 29.4235                       |
| Medicaid                          | 8.6004    | 10.9773        | 0.4334  | -12.9155                      | 30.1163                       |
| Medicaid                          | 8.5087    | 10.9781        | 0.4383  | -13.0089                      | 30.0263                       |
| Self-pay                          | reference | n/a            | n/a     | n/a                           | n/a.                          |
| English is Primary Language       | -0.01592  | 0.4094         | 0.9690  | -0.8183                       | 0.7865                        |
| History of Coronary Heart Disease | -2.7161   | 0.2620         | <.0001  | -3.2295                       | -2.2026                       |
| History of Diabetes Mellitus      | 0.1087    | 0.2325         | 0.6399  | -0.3469                       | 0.5644                        |
| History of Depression             | -0.9576   | 0.3076         | 0.0019  | -1.5605                       | -0.3547                       |

eTable 12: Full models for association between ZIP-level nutrition resources and systolic blood pressure

|                                             | Estimate  | Standard Error | p-value | Lower 95% Confidence Interval | Upper 95% Confidence Interval |
|---------------------------------------------|-----------|----------------|---------|-------------------------------|-------------------------------|
| History of Osteoarthritis                   | -0.5002   | 0.2009         | 0.0128  | -0.8940                       | -0.1063                       |
| Charlson Comorbidity Score                  | -0.05975  | 0.04502        | 0.1845  | -0.1480                       | 0.02849                       |
| Clinic Visits                               | -0.02845  | 0.01601        | 0.0756  | -0.05982                      | 0.002932                      |
| Clinic Connectedness                        |           |                |         |                               |                               |
| Connected to specific physician             | -1.9589   | 0.2580         | <.0001  | -2.4645                       | -1.4532                       |
| Connected to specific practice              | reference | n/a            | n/a     | n/a                           | n/a.                          |
| Lives in Urban Area                         | 0.1603    | 0.5860         | 0.7845  | -0.9893                       | 1.3098                        |
| Lives in Area with Low Physical Food Access | -0.5789   | 0.3269         | 0.0768  | -1.2201                       | 0.06231                       |
| Percentage of Area Living in Group Quarters | -0.00025  | 0.000262       | 0.3343  | -0.00077                      | 0.000261                      |
| Lives in Area with Low Vehicle Access       | 0.2662    | 0.2251         | 0.2371  | -0.1752                       | 0.7076                        |
| ZIP-level Unemployment Rate                 | 0.2065    | 0.1045         | 0.0493  | 0.000612                      | 0.4124                        |
| ZIP-level Median Household Income           | 1.008E-6  | 4.966E-6       | 0.8395  | -8.8E-6                       | 0.000011                      |
| ZIP-level Poverty Rate                      | 0.003660  | 0.03453        | 0.9158  | -0.06473                      | 0.07205                       |
| ZIP-level Segregation                       | -0.00086  | 0.01007        | 0.9325  | -0.02075                      | 0.01904                       |

eTable 13: Full models for association between ZIP-level nutrition resources and low density lipoprotein cholesterol

|                                   | Estimate  | Standard Error | p-value | Lower 95% Confidence Interval | Upper 95% Confidence Interval |
|-----------------------------------|-----------|----------------|---------|-------------------------------|-------------------------------|
| Intercept                         | 103.76    | 38.1863        | 0.0066  | 28.9153                       | 178.61                        |
| ZIP-level nutrition resources     | 0.09859   | 0.2309         | 0.6699  | -0.3573                       | 0.5545                        |
| ZIP-level afterschool resources   | -0.00381  | 0.1854         | 0.9837  | -0.3706                       | 0.3630                        |
| Age, years                        | -0.3600   | 0.03023        | <.0001  | -0.4193                       | -0.3008                       |
| Female                            | 11.7432   | 0.5645         | <.0001  | 10.6367                       | 12.8497                       |
| Race/ethnicity                    | 0         | .              | .       | .                             | .                             |
| Asian/Multi/Other                 | -2.6927   | 1.4423         | 0.0619  | -5.5197                       | 0.1343                        |
| Non-Hispanic Black                | 0.7350    | 1.2077         | 0.5428  | -1.6323                       | 3.1022                        |
| Hispanic                          | 0.3468    | 1.7794         | 0.8455  | -3.1409                       | 3.8345                        |
| Non-Hispanic White                | reference | n/a            | n/a     | n/a                           | n/a.                          |
| Education                         |           |                |         |                               |                               |
| College or >                      | -0.1046   | 0.9328         | 0.9107  | -1.9329                       | 1.7237                        |
| High School Diploma               | -0.2598   | 0.9497         | 0.7844  | -2.1212                       | 1.6016                        |
| Less than High School Diploma     | -0.8496   | 1.1612         | 0.4644  | -3.1256                       | 1.4264                        |
| Unknown/Declined                  | reference | n/a            | n/a     | n/a                           | n/a.                          |
| Insurance                         |           |                |         |                               |                               |
| Private                           | 37.5148   | 37.8147        | 0.3212  | -36.6052                      | 111.63                        |
| Medicare and Medicaid             | 36.1970   | 37.8181        | 0.3385  | -37.9296                      | 110.32                        |
| Medicaid                          | 37.4872   | 37.8163        | 0.3216  | -36.6360                      | 111.61                        |
| Medicaid                          | 35.4040   | 37.8171        | 0.3492  | -38.7206                      | 109.53                        |
| Self-pay                          | reference | n/a            | n/a     | n/a                           | n/a.                          |
| English is Primary Language       | 0.6482    | 1.2438         | 0.6023  | -1.7897                       | 3.0861                        |
| History of Hypertension           | -4.3457   | 1.1538         | 0.0002  | -6.6072                       | -2.0842                       |
| History of Coronary Heart Disease | -14.8429  | 0.7275         | <.0001  | -16.2689                      | -13.4170                      |
| History of Diabetes Mellitus      | -16.1429  | 0.6619         | <.0001  | -17.4404                      | -14.8455                      |

eTable 13: Full models for association between ZIP-level nutrition resources and low density lipoprotein cholesterol

|                                             | Estimate  | Standard Error | p-value | Lower 95% Confidence Interval | Upper 95% Confidence Interval |
|---------------------------------------------|-----------|----------------|---------|-------------------------------|-------------------------------|
| History of Depression                       | 1.0979    | 0.9513         | 0.2485  | -0.7668                       | 2.9626                        |
| History of Osteoarthritis                   | 1.0828    | 0.5853         | 0.0643  | -0.06449                      | 2.2302                        |
| Charlson Comorbidity Score                  | -0.9716   | 0.1366         | <.0001  | -1.2394                       | -0.7038                       |
| Clinic Visits                               | -0.1983   | 0.04901        | <.0001  | -0.2944                       | -0.1023                       |
| Clinic Connectedness                        |           |                |         |                               |                               |
| Connected to specific physician             | -1.4526   | 0.8446         | 0.0855  | -3.1081                       | 0.2029                        |
| Connected to specific practice              | reference | n/a            | n/a     | n/a                           | n/a.                          |
| Lives in Urban Area                         | -0.4909   | 1.7202         | 0.7754  | -3.8649                       | 2.8831                        |
| Lives in Area with Low Physical Food Access | 0.2234    | 1.0117         | 0.8252  | -1.7604                       | 2.2073                        |
| Percentage of Area Living in Group Quarters | 0.001870  | 0.000788       | 0.0177  | 0.000325                      | 0.003414                      |
| Lives in Area with Low Vehicle Access       | -1.1732   | 0.6607         | 0.0759  | -2.4686                       | 0.1222                        |
| ZIP-level Unemployment Rate                 | 0.1519    | 0.3138         | 0.6287  | -0.4659                       | 0.7698                        |
| ZIP-level Median Household Income           | -0.00001  | 0.000015       | 0.3460  | -0.00004                      | 0.000015                      |
| ZIP-level Poverty Rate                      | -0.06528  | 0.1068         | 0.5418  | -0.2760                       | 0.1454                        |
| ZIP-level Segregation                       | -0.00654  | 0.03045        | 0.8301  | -0.06656                      | 0.05347                       |



eTable 14: Full models for association between ZIP-level substance abuse resources and hemoglobin A1c

|                                     | Estimate  | Standard Error | p-value | Lower 95% Confidence Interval | Upper 95% Confidence Interval |
|-------------------------------------|-----------|----------------|---------|-------------------------------|-------------------------------|
| Intercept                           | 7.0576    | 0.3362         | <.0001  | 6.3986                        | 7.7166                        |
| ZIP-level substance abuse resources | -0.00251  | 0.01460        | 0.8634  | -0.03113                      | 0.02611                       |
| ZIP-level afterschool resources     | 0.01106   | 0.007376       | 0.1336  | -0.00339                      | 0.02552                       |
| Age, years                          | -0.01059  | 0.001940       | <.0001  | -0.01440                      | -0.00679                      |
| Female                              | -0.1380   | 0.03843        | 0.0003  | -0.2133                       | -0.06263                      |
| Race/ethnicity                      |           |                |         |                               |                               |
| Asian/Multi/Other                   | -0.08503  | 0.08123        | 0.2952  | -0.2443                       | 0.07420                       |
| Non-Hispanic Black                  | 0.07012   | 0.06209        | 0.2588  | -0.05160                      | 0.1918                        |
| Hispanic                            | 0.06593   | 0.08944        | 0.4611  | -0.1094                       | 0.2413                        |
| Non-Hispanic White                  | reference | n/a            | n/a     | n/a                           | n/a.                          |
| Education                           |           |                |         |                               |                               |
| College or >                        | -0.1646   | 0.06820        | 0.0158  | -0.2983                       | -0.03090                      |
| High School Diploma                 | -0.01912  | 0.06665        | 0.7742  | -0.1498                       | 0.1116                        |
| Less than High School Diploma       | -0.07235  | 0.07528        | 0.3366  | -0.2200                       | 0.07529                       |
| Unknown/Declined                    | reference | n/a            | n/a     | n/a                           | n/a.                          |
| Insurance                           |           |                |         |                               |                               |
| Private                             | 0.2134    | 0.05612        | 0.0001  | 0.1034                        | 0.3234                        |
| Medicare and Medicaid               | 0.03459   | 0.05765        | 0.5486  | -0.07842                      | 0.1476                        |
| Medicaid                            | 0.3912    | 0.06811        | <.0001  | 0.2577                        | 0.5247                        |
| Medicaid                            | reference | n/a            | n/a     | n/a                           | n/a.                          |
| English is Primary Language         | -0.1599   | 0.06505        | 0.0140  | -0.2874                       | -0.03232                      |
| History of Hypertension             | 0.2365    | 0.05985        | <.0001  | 0.1191                        | 0.3538                        |
| History of Coronary Heart Disease   | -0.03921  | 0.04940        | 0.4274  | -0.1361                       | 0.05764                       |

eTable 14: Full models for association between ZIP-level substance abuse resources and hemoglobin A1c

|                                             | Estimate  | Standard Error     | p-value            | Lower 95% Confidence Interval | Upper 95% Confidence Interval |
|---------------------------------------------|-----------|--------------------|--------------------|-------------------------------|-------------------------------|
| History of Depression                       | -0.03705  | 0.05766            | 0.5205             | -0.1501                       | 0.07598                       |
| History of Osteoarthritis                   | -0.1499   | 0.04010            | 0.0002             | -0.2285                       | -0.07134                      |
| Charlson Comorbidity Score                  | 0.01588   | 0.008146           | 0.0513             | -0.00009                      | 0.03185                       |
| Clinic Visits                               | 0.006502  | 0.002846           | 0.0224             | 0.000922                      | 0.01208                       |
| Clinic Connectedness                        |           |                    |                    |                               |                               |
| Connected to specific physician             | -0.08553  | 0.05430            | 0.1153             | -0.1920                       | 0.02092                       |
| Connected to specific practice              | reference | n/a                | n/a                | n/a                           | n/a.                          |
| Lives in Urban Area                         | 0.3470    | 0.1270             | 0.0063             | 0.09804                       | 0.5959                        |
| Lives in Area with Low Physical Food Access | -0.07748  | 0.06097            | 0.2039             | -0.1970                       | 0.04205                       |
| Percentage of Area Living in Group Quarters | -0.00001  | 0.000060           | 0.8418             | -0.00013                      | 0.000106                      |
| Lives in Area with Low Vehicle Access       | 0.04455   | 0.04429            | 0.3145             | -0.04228                      | 0.1314                        |
| ZIP-level Unemployment Rate                 | 0.03710   | 0.01932            | 0.0549             | -0.00078                      | 0.07499                       |
| ZIP-level Median Household Income           | 1.636E-6  | Unable to estimate | Unable to estimate | Unable to estimate            | Unable to estimate            |
| ZIP-level Poverty Rate                      | -0.00359  | 0.005890           | 0.5418             | -0.01514                      | 0.007953                      |
| ZIP-level Segregation                       | -0.00001  | 0.001802           | 0.9950             | -0.00354                      | 0.003522                      |

eTable 15: Full models for association between ZIP-level mental health resources and hemoglobin A1c

|                                   | Estimate  | Standard Error | p-value | Lower 95% Confidence Interval | Upper 95% Confidence Interval |
|-----------------------------------|-----------|----------------|---------|-------------------------------|-------------------------------|
| Intercept                         | 7.0641    | 0.3371         | <.0001  | 6.4033                        | 7.7250                        |
| ZIP-level mental health resources | -0.00348  | 0.01130        | 0.7582  | -0.02564                      | 0.01868                       |
| ZIP-level afterschool resources   | 0.01159   | 0.006992       | 0.0974  | -0.00212                      | 0.02530                       |
| Age, years                        | -0.01058  | 0.001940       | <.0001  | -0.01438                      | -0.00678                      |
| Female                            | -0.1382   | 0.03843        | 0.0003  | -0.2135                       | -0.06283                      |
| Race/ethnicity                    |           |                |         |                               |                               |
| Asian/Multi/Other                 | -0.08415  | 0.08130        | 0.3007  | -0.2435                       | 0.07522                       |
| Non-Hispanic Black                | 0.07084   | 0.06217        | 0.2545  | -0.05103                      | 0.1927                        |
| Hispanic                          | 0.06543   | 0.08946        | 0.4646  | -0.1099                       | 0.2408                        |
| Non-Hispanic White                | reference | n/a            | n/a     | n/a                           | n/a.                          |
| Education                         |           |                |         |                               |                               |
| College or >                      | -0.1647   | 0.06820        | 0.0158  | -0.2984                       | -0.03095                      |
| High School Diploma               | -0.01936  | 0.06665        | 0.7715  | -0.1500                       | 0.1113                        |
| Less than High School Diploma     | -0.07325  | 0.07536        | 0.3312  | -0.2210                       | 0.07454                       |
| Unknown/Declined                  | reference | n/a            | n/a     | n/a                           | n/a.                          |
| Insurance                         |           |                |         |                               |                               |
| Private                           | 0.2135    | 0.05612        | 0.0001  | 0.1035                        | 0.3235                        |
| Medicare and Medicaid             | 0.03499   | 0.05767        | 0.5440  | -0.07805                      | 0.1480                        |
| Medicaid                          | 0.3913    | 0.06810        | <.0001  | 0.2578                        | 0.5248                        |
| Medicaid                          | reference | n/a            | n/a     | n/a                           | n/a.                          |
| English is Primary Language       | -0.1597   | 0.06502        | 0.0141  | -0.2871                       | -0.03218                      |
| History of Hypertension           | 0.2365    | 0.05985        | <.0001  | 0.1191                        | 0.3538                        |
| History of Coronary Heart Disease | -0.03931  | 0.04940        | 0.4262  | -0.1362                       | 0.05753                       |
| History of Depression             | -0.03699  | 0.05766        | 0.5212  | -0.1500                       | 0.07604                       |

eTable 15: Full models for association between ZIP-level mental health resources and hemoglobin A1c

|                                             | Estimate  | Standard Error     | p-value            | Lower 95% Confidence Interval | Upper 95% Confidence Interval |
|---------------------------------------------|-----------|--------------------|--------------------|-------------------------------|-------------------------------|
| History of Osteoarthritis                   | -0.1498   | 0.04009            | 0.0002             | -0.2284                       | -0.07123                      |
| Charlson Comorbidity Score                  | 0.01585   | 0.008146           | 0.0518             | -0.00012                      | 0.03182                       |
| Clinic Visits                               | 0.006518  | 0.002846           | 0.0220             | 0.000939                      | 0.01210                       |
| Clinic Connectedness                        |           |                    |                    |                               |                               |
| Connected to specific physician             | -0.08559  | 0.05429            | 0.1150             | -0.1920                       | 0.02085                       |
| Connected to specific practice              | reference | n/a                | n/a                | n/a                           | n/a.                          |
| Lives in Urban Area                         | 0.3477    | 0.1268             | 0.0061             | 0.09914                       | 0.5962                        |
| Lives in Area with Low Physical Food Access | -0.07867  | 0.06091            | 0.1966             | -0.1981                       | 0.04074                       |
| Percentage of Area Living in Group Quarters | -0.00001  | 0.000060           | 0.8517             | -0.00013                      | 0.000107                      |
| Lives in Area with Low Vehicle Access       | 0.04534   | 0.04440            | 0.3072             | -0.04169                      | 0.1324                        |
| ZIP-level Unemployment Rate                 | 0.03660   | 0.01940            | 0.0592             | -0.00143                      | 0.07462                       |
| ZIP-level Median Household Income           | 1.599E-6  | Unable to estimate | Unable to estimate | Unable to estimate            | Unable to estimate            |
| ZIP-level Poverty Rate                      | -0.00359  | 0.005889           | 0.5423             | -0.01513                      | 0.007956                      |
| ZIP-level Segregation                       | -0.00002  | 0.001802           | 0.9931             | -0.00355                      | 0.003517                      |

eTable 16: Full models for association between ZIP-level food resources and systolic blood pressure in those without hypertension

|                                 | Estimate | Standard Error | p-value | Lower 95% Confidence Interval | Upper 95% Confidence Interval |
|---------------------------------|----------|----------------|---------|-------------------------------|-------------------------------|
| Intercept                       | 118.75   | 2.4411         | <.0001  | 113.96                        | 123.54                        |
| ZIP-level food resources        | -0.08047 | 0.03550        | 0.0262  | -0.1511                       | -0.00980                      |
| ZIP-level afterschool resources | 0.06047  | 0.03336        | 0.0730  | -0.00574                      | 0.1267                        |

eTable 16: Full models for association between ZIP-level food resources and systolic blood pressure in those without hypertension

|                                 | Estimate  | Standard Error | p-value | Lower 95% Confidence Interval | Upper 95% Confidence Interval |
|---------------------------------|-----------|----------------|---------|-------------------------------|-------------------------------|
| Age, years                      | 0.1657    | 0.005420       | <.0001  | 0.1550                        | 0.1763                        |
| Female                          | -5.2802   | 0.1186         | <.0001  | -5.5126                       | -5.0477                       |
| Race/ethnicity                  |           |                |         |                               |                               |
| Asian/Multi/Other               | -2.6721   | 0.2363         | <.0001  | -3.1353                       | -2.2089                       |
| Non-Hispanic Black              | 0.6111    | 0.2706         | 0.0239  | 0.08082                       | 1.1415                        |
| Hispanic                        | -0.7475   | 0.2728         | 0.0061  | -1.2822                       | -0.2129                       |
| Non-Hispanic White              | reference | n/a            | n/a     | n/a                           | n/a.                          |
| Education                       |           |                |         |                               |                               |
| College or >                    | -0.02240  | 0.1940         | 0.9080  | -0.4026                       | 0.3577                        |
| High School Diploma             | 0.4658    | 0.2125         | 0.0284  | 0.04932                       | 0.8823                        |
| Less than High School Diploma   | 0.9903    | 0.2550         | 0.0001  | 0.4905                        | 1.4901                        |
| Unknown/Declined                | reference | n/a            | n/a     | n/a                           | n/a.                          |
| Insurance                       |           |                |         |                               |                               |
| Private                         | -4.3672   | 2.1456         | 0.0418  | -8.5725                       | -0.1618                       |
| Medicare and Medicaid           | -4.2024   | 2.1674         | 0.0525  | -8.4505                       | 0.04573                       |
| Medicaid                        | -4.6349   | 2.1479         | 0.0309  | -8.8449                       | -0.4248                       |
| Medicaid                        | -2.2777   | 2.1596         | 0.2916  | -6.5105                       | 1.9551                        |
| Self-pay                        | reference | n/a            | n/a     | n/a                           | n/a.                          |
| English is Primary Language     | 0.9827    | 0.2700         | 0.0003  | 0.4536                        | 1.5119                        |
| History of Depression           | -0.1126   | 0.2130         | 0.5970  | -0.5301                       | 0.3048                        |
| History of Osteoarthritis       | 0.5132    | 0.1754         | 0.0034  | 0.1695                        | 0.8570                        |
| Charlson Comorbidity Score      | 0.1840    | 0.04369        | <.0001  | 0.09834                       | 0.2696                        |
| Clinic Visits                   | -0.05715  | 0.01445        | <.0001  | -0.08548                      | -0.02882                      |
| Clinic Connectedness            |           |                |         |                               |                               |
| Connected to specific physician | -0.6938   | 0.1282         | <.0001  | -0.9450                       | -0.4425                       |

eTable 16: Full models for association between ZIP-level food resources and systolic blood pressure in those without hypertension

|                                             | Estimate  | Standard Error | p-value | Lower 95% Confidence Interval | Upper 95% Confidence Interval |
|---------------------------------------------|-----------|----------------|---------|-------------------------------|-------------------------------|
| Connected to specific practice              | reference | n/a            | n/a     | n/a                           | n/a.                          |
| Lives in Urban Area                         | -0.4004   | 0.3700         | 0.2793  | -1.1261                       | 0.3254                        |
| Lives in Area with Low Physical Food Access | 0.2289    | 0.1896         | 0.2274  | -0.1429                       | 0.6006                        |
| Percentage of Area Living in Group Quarters | -0.00031  | 0.000146       | 0.0348  | -0.00060                      | -0.00002                      |
| Lives in Area with Low Vehicle Access       | -0.00646  | 0.1455         | 0.9646  | -0.2917                       | 0.2788                        |
| ZIP-level Unemployment Rate                 | 0.2795    | 0.07224        | 0.0001  | 0.1373                        | 0.4218                        |
| ZIP-level Median Household Income           | -0.00002  | 3.286E-6       | <.0001  | -0.00002                      | -9.76E-6                      |
| ZIP-level Poverty Rate                      | -0.02364  | 0.02254        | 0.2968  | -0.06835                      | 0.02108                       |
| ZIP-level Segregation                       | 0.01658   | 0.006771       | 0.0154  | 0.003208                      | 0.02995                       |

**STROBE 2007 (v4) Statement—Checklist of items that should be included in reports of *cross-sectional studies***

| Section/Topic             | Item # | Recommendation                                                                                                                                                                       | Reported on page #        |
|---------------------------|--------|--------------------------------------------------------------------------------------------------------------------------------------------------------------------------------------|---------------------------|
| Title and abstract        | 1      | (a) Indicate the study’s design with a commonly used term in the title or the abstract                                                                                               | 1                         |
|                           |        | (b) Provide in the abstract an informative and balanced summary of what was done and what was found                                                                                  | 3-4                       |
| <b>Introduction</b>       |        |                                                                                                                                                                                      |                           |
| Background/rationale      | 2      | Explain the scientific background and rationale for the investigation being reported                                                                                                 | 6-7                       |
| Objectives                | 3      | State specific objectives, including any prespecified hypotheses                                                                                                                     | 7                         |
| <b>Methods</b>            |        |                                                                                                                                                                                      | <b>7-8</b>                |
| Study design              | 4      | Present key elements of study design early in the paper                                                                                                                              |                           |
| Setting                   | 5      | Describe the setting, locations, and relevant dates, including periods of recruitment, exposure, follow-up, and data collection                                                      | 7-8                       |
| Participants              | 6      | (a) Give the eligibility criteria, and the sources and methods of selection of participants                                                                                          | 7-8                       |
| Variables                 | 7      | Clearly define all outcomes, exposures, predictors, potential confounders, and effect modifiers. Give diagnostic criteria, if applicable                                             | 8-10                      |
| Data sources/ measurement | 8*     | For each variable of interest, give sources of data and details of methods of assessment (measurement). Describe comparability of assessment methods if there is more than one group | 8-10                      |
| Bias                      | 9      | Describe any efforts to address potential sources of bias                                                                                                                            | 10-13                     |
| Study size                | 10     | Explain how the study size was arrived at                                                                                                                                            | 13                        |
| Quantitative variables    | 11     | Explain how quantitative variables were handled in the analyses. If applicable, describe which groupings were chosen and why                                                         | 10-13                     |
| Statistical methods       | 12     | (a) Describe all statistical methods, including those used to control for confounding                                                                                                | 10-13                     |
|                           |        | (b) Describe any methods used to examine subgroups and interactions                                                                                                                  | 10-13, technical appendix |
|                           |        | (c) Explain how missing data were addressed                                                                                                                                          | 10-13                     |
|                           |        | (d) If applicable, describe analytical methods taking account of sampling strategy                                                                                                   | 10-13                     |
|                           |        | (e) Describe any sensitivity analyses                                                                                                                                                | 10-13                     |

|                          |     |                                                                                                                                                                                                              |                             |
|--------------------------|-----|--------------------------------------------------------------------------------------------------------------------------------------------------------------------------------------------------------------|-----------------------------|
| <b>Results</b>           |     |                                                                                                                                                                                                              |                             |
| Participants             | 13* | (a) Report numbers of individuals at each stage of study—eg numbers potentially eligible, examined for eligibility, confirmed eligible, included in the study, completing follow-up, and analysed            | 13                          |
|                          |     | (b) Give reasons for non-participation at each stage                                                                                                                                                         | 13                          |
|                          |     | (c) Consider use of a flow diagram                                                                                                                                                                           | n/a                         |
| Descriptive data         | 14* | (a) Give characteristics of study participants (eg demographic, clinical, social) and information on exposures and potential confounders                                                                     | 13-14, table 1, etables 2-3 |
|                          |     | (b) Indicate number of participants with missing data for each variable of interest                                                                                                                          | Etables 2-3                 |
| Outcome data             | 15* | Report numbers of outcome events or summary measures                                                                                                                                                         | 14-15                       |
| Main results             | 16  | (a) Give unadjusted estimates and, if applicable, confounder-adjusted estimates and their precision (eg, 95% confidence interval). Make clear which confounders were adjusted for and why they were included | 14-15                       |
|                          |     | (b) Report category boundaries when continuous variables were categorized                                                                                                                                    | n/a                         |
|                          |     | (c) If relevant, consider translating estimates of relative risk into absolute risk for a meaningful time period                                                                                             | n/a                         |
| Other analyses           | 17  | Report other analyses done—eg analyses of subgroups and interactions, and sensitivity analyses                                                                                                               | 14-16, eappendix            |
| <b>Discussion</b>        |     |                                                                                                                                                                                                              |                             |
| Key results              | 18  | Summarise key results with reference to study objectives                                                                                                                                                     | 16                          |
| Limitations              | 19  | Discuss limitations of the study, taking into account sources of potential bias or imprecision. Discuss both direction and magnitude of any potential bias                                                   | 18-19                       |
| Interpretation           | 20  | Give a cautious overall interpretation of results considering objectives, limitations, multiplicity of analyses, results from similar studies, and other relevant evidence                                   | 19                          |
| Generalisability         | 21  | Discuss the generalisability (external validity) of the study results                                                                                                                                        | 19                          |
| <b>Other information</b> |     |                                                                                                                                                                                                              |                             |
| Funding                  | 22  | Give the source of funding and the role of the funders for the present study and, if applicable, for the original study on which the present article is based                                                | 20                          |

\*Give information separately for cases and controls in case-control studies and, if applicable, for exposed and unexposed groups in cohort and cross-sectional studies.

**Note:** An Explanation and Elaboration article discusses each checklist item and gives methodological background and published examples of transparent reporting. The STROBE checklist is best used in conjunction with this article (freely available on the Web sites of PLoS Medicine at <http://www.plosmedicine.org/>, Annals of Internal Medicine at <http://www.annals.org/>, and Epidemiology at <http://www.epidem.com/>). Information on the STROBE Initiative is available at [www.strobe-statement.org](http://www.strobe-statement.org).



# BMJ Open

## Association Between Access to Social Service Resources and Cardiometabolic Risk Factors: A Machine Learning and Multi-Level Modeling Analysis

|                                 |                                                                                                                                                                                                                                                                                                                                                                                                                                                                                                                                                                                                                                |
|---------------------------------|--------------------------------------------------------------------------------------------------------------------------------------------------------------------------------------------------------------------------------------------------------------------------------------------------------------------------------------------------------------------------------------------------------------------------------------------------------------------------------------------------------------------------------------------------------------------------------------------------------------------------------|
| Journal:                        | <i>BMJ Open</i>                                                                                                                                                                                                                                                                                                                                                                                                                                                                                                                                                                                                                |
| Manuscript ID                   | bmjopen-2018-025281.R2                                                                                                                                                                                                                                                                                                                                                                                                                                                                                                                                                                                                         |
| Article Type:                   | Research                                                                                                                                                                                                                                                                                                                                                                                                                                                                                                                                                                                                                       |
| Date Submitted by the Author:   | 07-Jan-2019                                                                                                                                                                                                                                                                                                                                                                                                                                                                                                                                                                                                                    |
| Complete List of Authors:       | Berkowitz, Seth; University of North Carolina at Chapel Hill School of Medicine, General Medicine and Clinical Epidemiology<br>Basu, Sanjay; Stanford University, Departments of Medicine and of Health Research and Policy<br>Venkataramani, Atheendar; University of Pennsylvania, Department of Medical Ethics and Health Policy, Perelman School of Medicine<br>Reznor, Gally; Massachusetts General Hospital, Division of General Internal Medicine<br>Fleegler, Eric; Children's Hospital Boston, Division of Emergency Medicine<br>Atlas, Steven; Massachusetts General Hospital, Division of General Internal Medicine |
| <b>Primary Subject Heading</b>: | Epidemiology                                                                                                                                                                                                                                                                                                                                                                                                                                                                                                                                                                                                                   |
| Secondary Subject Heading:      | General practice / Family practice, Health services research, Public health                                                                                                                                                                                                                                                                                                                                                                                                                                                                                                                                                    |
| Keywords:                       | SOCIAL MEDICINE, PRIMARY CARE, Hypertension < CARDIOLOGY, DIABETES & ENDOCRINOLOGY, Cardiac Epidemiology < CARDIOLOGY                                                                                                                                                                                                                                                                                                                                                                                                                                                                                                          |
|                                 |                                                                                                                                                                                                                                                                                                                                                                                                                                                                                                                                                                                                                                |

SCHOLARONE™  
Manuscripts

1  
2  
3 **Association Between Access to Social Service Resources and Cardiometabolic**  
4  
5 **Risk Factors: A Machine Learning and Multi-Level Modeling Analysis**  
6  
7  
8  
9

10 Seth A. Berkowitz<sup>1-3</sup>, Sanjay Basu<sup>4,5</sup>, Atheendar Venkataramani<sup>6,7</sup>, Gally Reznor<sup>8</sup>, Eric  
11 W. Fleegler<sup>9,10</sup>, Steven J. Atlas<sup>8,9</sup>  
12  
13

14  
15  
16 <sup>1</sup> Division of General Medicine and Clinical Epidemiology, Department of Medicine,  
17 University of North Carolina School of Medicine, Chapel Hill, NC  
18

19  
20 <sup>2</sup> The Cecil G. Sheps Center for Health Services Research, University of North  
21 Carolina at Chapel Hill, Chapel Hill, NC  
22

23  
24  
25 <sup>3</sup> Center for Health Equity Research, Department of Social Medicine, University of  
26 North Carolina School of Medicine, Chapel Hill, NC  
27

28  
29  
30 <sup>4</sup> Center for Primary Care and Outcomes Research, Center for Population Health  
31 Sciences, Departments of Medicine and of Health Research and Policy, Stanford  
32 University, Palo Alto, California  
33

34  
35  
36 <sup>5</sup> Center for Primary Care, Harvard Medical School  
37

38  
39  
40 <sup>6</sup> Department of Medical Ethics and Health Policy, Perelman School of Medicine,  
41 University of Pennsylvania, Philadelphia.  
42

43  
44  
45 <sup>7</sup> Leonard Davis Institute of Health Economics, University of Pennsylvania,  
46 Philadelphia.  
47

48  
49  
50 <sup>8</sup> Division of General Internal Medicine, Massachusetts General Hospital, Boston,  
51 Massachusetts  
52

53  
54  
55 <sup>9</sup> Harvard Medical School, Boston, Massachusetts  
56  
57

1  
2  
3 <sup>10</sup> Division of Emergency Medicine, Boston Children's Hospital, Boston,  
4  
5  
6 Massachusetts

7  
8  
9  
10 Corresponding Author and Request for Reprints:

11  
12 Seth A. Berkowitz, MD MPH

13  
14 5034 Old Clinic Bldg

15  
16  
17 CB 7110

18  
19  
20 Chapel Hill, NC 27599

21  
22 Tel: 919-966-2276

23  
24  
25 seth\_berkowitz@med.unc.edu

26  
27 Tables: 3

28  
29  
30 Figures: 1

31  
32 Word Count

33  
34 Abstract: 299/300

35  
36 Manuscript: 3344/4000

37  
38 Running Title: Social Service Resources and Cardiometabolic Risk

39  
40  
41 Key Words: cardiovascular disease, food insecurity, health disparities,

42  
43 socioeconomic status  
44  
45  
46  
47  
48  
49  
50  
51  
52  
53  
54  
55  
56  
57

1  
2  
3 **Objectives:** Interest in linking patients with unmet social needs to area-level  
4 resources, such as food pantries and employment centers in one's ZIP code, is  
5 growing. However, whether the presence of these resources is associated with  
6 better health outcomes is unclear. We sought to determine if area-level resources,  
7 defined as organizations that assist individuals with meeting health-related social  
8 needs, are associated with lower levels of cardiometabolic risk factors.  
9

10  
11  
12  
13  
14  
15  
16  
17 **Design:** Cross-sectional.

18  
19  
20 **Setting:** Data were collected in a primary care network in eastern Massachusetts in  
21 2015.  
22

23  
24 **Participants and Primary and Secondary Outcome Measures:** 123,355

25 participants were included. The primary outcome was body mass index (BMI). The  
26 secondary outcomes were systolic blood pressure (SBP), low density lipoprotein  
27 cholesterol (LDL), and hemoglobin A1c (HbA1c). All participants were included in  
28 BMI analyses. Participants with hypertension were included in SBP analyses.  
29 Participants with an indication for cholesterol lowering were included in LDL  
30 analyses, and participants with diabetes mellitus were included in HbA1c analyses.  
31 We used a random forest-based machine-learning algorithm to identify types of  
32 resources associated with study outcomes. We then tested the association of ZIP-  
33 level selected resource types (three for BMI, two each for SBP and HbA1c analyses,  
34 and one for LDL analyses) with these outcomes, using multi-level models to account  
35 for individual-level, clinic-level, and other area-level factors.  
36  
37  
38  
39  
40  
41  
42  
43  
44  
45  
46  
47  
48  
49  
50

51  
52 **Results:** Resources associated with lower BMI included more food resources (-0.08  
53 kg/m<sup>2</sup> per additional resource, 95% Confidence Interval[CI] -0.13 to -0.03 kg/m<sup>2</sup>),  
54  
55  
56  
57

1  
2  
3 employment resources (-0.05 kg/m<sup>2</sup>, 95%CI -0.11 to -0.002 kg/m<sup>2</sup>), and nutrition  
4  
5 resources (-0.07 kg/m<sup>2</sup>, 95%CI -0.13 to -0.01 kg/m<sup>2</sup>). No area resources were  
6  
7 associated with differences in SBP, LDL, or HbA1c.  
8  
9

10 **Conclusions:** Access to specific local resources is associated with better BMI. Efforts  
11  
12 to link patients to area resources, and to improve the resources landscape within  
13  
14 communities, may help reduce BMI and improve population health.  
15  
16  
17  
18  
19  
20  
21  
22  
23  
24  
25  
26  
27  
28  
29  
30  
31  
32  
33  
34  
35  
36  
37  
38  
39  
40  
41  
42  
43  
44  
45  
46  
47  
48  
49  
50  
51  
52  
53  
54  
55  
56  
57

### Strengths and Limitations of the Study

- Strength: Extensive individual and area-level data
- Strength: Innovative machine learning methods to overcome issues of collinearity and avoid multiple testing
- Strength: Use hierarchical linear modeling to account for data structure
- Limitation: Cross-sectional study
- Limitation: No information on use of resources

1  
2  
3 Cardiometabolic disease remains the most common cause of morbidity and  
4 mortality in the U.S.<sup>1</sup> Though better control of cardiometabolic risk factors could  
5 substantially reduce this morbidity and mortality, individuals with low  
6 socioeconomic status (SES) are less likely to achieve recommended goals.<sup>2</sup> Among  
7 the reasons for this are patient-reported health-related social needs, including food  
8 insecurity, housing instability, and lack of transportation. These health-related  
9 social needs have been associated with higher levels of important cardiometabolic  
10 risk factors including increased body mass index (BMI), systolic blood pressure  
11 (SBP), low density lipoprotein cholesterol (LDL), and hemoglobin A1c (HbA1c), even  
12 after adjusting for factors like race/ethnicity, income, and education.<sup>3-8</sup> Proposed  
13 mechanisms linking health-related social needs to cardiometabolic risk factors  
14 including reduced dietary quality, cost-related medication underuse, reduced  
15 cognitive 'bandwidth' to attend to health, and disruptions in clinical care.<sup>9-11</sup>

16  
17  
18  
19  
20  
21  
22  
23  
24  
25  
26  
27  
28  
29  
30  
31  
32  
33  
34  
35  
36 Healthcare systems are increasingly interested in working with community partners  
37 to help link their patients to local resources, such as food pantries or housing  
38 agencies, to help meet health-related social needs.<sup>12-16</sup> This approach is exemplified  
39 by the Accountable Health Communities initiative from the Centers for Medicare &  
40 Medicaid Services, which involves screening for adverse social circumstances and  
41 linking those who screen positive to community resources.<sup>17</sup> However, there remain  
42 significant gaps in knowledge regarding such approaches. Critically, healthcare  
43 systems need to know which organizations to partner with, and potentially what  
44 types of resources to invest in.<sup>18</sup> The specific resources that best address a

1  
2  
3 particular health-related need may not be straightforward. For example, a food  
4  
5 pantry could help alleviate food insecurity, but so could employment.  
6  
7  
8  
9

10 To help address these issues, and inform further interventions, we sought to study  
11  
12 associations between area resources and cardiometabolic risk factors in a large  
13  
14 primary care network. Our goal was to understand which resource types were  
15  
16 associated with improved levels of BMI, SBP, LDL, and HbA1c, and to determine  
17  
18 whether area resources had stronger associations with cardiometabolic risk factors  
19  
20 for conditions that are less amenable to clinical management.  
21  
22  
23  
24  
25

## 26 **Methods**

### 27 *Setting and Study Sample*

28  
29 Data for this study came from two primary sources: an asset mapping of community  
30  
31 resources, and electronic health records. The asset mapping came from the  
32  
33 HelpSteps database, a comprehensive asset mapping of area resources in eastern  
34  
35 Massachusetts.<sup>19</sup> The clinical records came from a primary care network in eastern  
36  
37 Massachusetts, a network of 18 primary care practices, including hospital-based,  
38  
39 academic, and community health center sites. All adult (age  $\geq 18$  years) primary  
40  
41 care patients seen between January 1, 2012 and December 31, 2015 were included.  
42  
43 Data were current on December 31, 2015. The most recent patient address was  
44  
45 geocoded for the study. Patients without available addresses were excluded—prior  
46  
47 work has shown that only 0.15% of patients in this cohort could not be geocoded.<sup>20</sup>  
48  
49  
50  
51  
52  
53  
54  
55  
56  
57



1  
2  
3 The Partners Healthcare Human Research Committee approved this analysis, which  
4 entailed use of secondary data without patient contact (Protocol Number:  
5  
6 2017P000964).  
7  
8  
9

### 10 11 12 *Patient and Public Involvement* 13

14 The study research question was developed in reference to patient priorities  
15 regarding the incorporation of neighborhood factors that promote health into  
16 population health management. Patients were not involved in the design of the  
17 study or in recruitment. We plan to disseminate study results via open-access  
18 publication.  
19  
20  
21  
22  
23  
24  
25  
26  
27  
28

### 29 *Area Resources* 30

31 HelpSteps ([www.helpsteps.com](http://www.helpsteps.com)) is a web and mobile screening and referral system  
32 for social needs. Originally launched in 2010, the system uses a database of social  
33 services throughout the greater Boston area to connect families to appropriate  
34 services. The database is maintained in collaboration between Boston Children's  
35 Hospital and the Mayor's Health Line at the Boston Public Health Commission.  
36 Every agency is contacted at least once per year to maintain the accuracy of the data  
37 and to grow the database. HelpSteps contains information on area resources across  
38 16 non-mutually exclusive domains: health, housing, food employment, violence,  
39 safety, substance abuse, mental health, education, parenting, nutrition, after school,  
40 sexual health, transportation, diabetes, and care transitions. An example of  
41 organizations that would be in the food domain are food pantries. The employment  
42  
43  
44  
45  
46  
47  
48  
49  
50  
51  
52  
53  
54  
55  
56  
57

1  
2  
3 domain would consist of job placement or job training services. And the nutrition  
4  
5 domain would include organizations that provide food counseling. Agencies  
6  
7 providing multiple resources could be included in more than one domain. Because  
8  
9 individual-level data for this study came from 2015, we used information from  
10  
11 HelpSteps that was current as of 2015. For this study, 'area resources' are defined as  
12  
13 the number of organizations found in the HelpSteps database providing assistance  
14  
15 for a given domain and within a given geographic area.  
16  
17  
18

19  
20 After geocoding the addresses for both individuals and the area resource  
21  
22 organization, we created counts, for each individual, of how many resources for each  
23  
24 domain were within the same geographic area as they were. We did this at 4  
25  
26 geographic levels in roughly increasing order of size: census tract (using U.S. Census  
27  
28 2010 boundaries), ZIP code tabulation area (which we refer to throughout this  
29  
30 paper as 'ZIP' level, owing to common use of the term, again using U.S. Census 2010  
31  
32 boundaries), 'neighborhood' (e.g. Allston, Roxbury, a designation based on Boston  
33  
34 city planning that may better capture actual movement patterns), and county.  
35  
36  
37  
38  
39  
40

### 41 *Clinical Outcomes*

42  
43 To assess clinical outcomes, we calculated the mean of all values recorded in 2015  
44  
45 from individual's electronic health record for the following measurements: body  
46  
47 mass index (in kg/m<sup>2</sup>), systolic blood pressure (in mm Hg), low-density lipoprotein  
48  
49 cholesterol (in mg/dL) and HbA1c (%). All values were obtained in the process of  
50  
51 usual care.  
52  
53  
54  
55  
56  
57

### *Covariates*

To account for possible confounding of the association between area resources and health outcomes, we collected the following variables from the electronic health record: age (years), gender (male or female), race/ethnicity (non-Hispanic white, non-Hispanic black, Hispanic, or Asian/other/multi), education (less than high school diploma, high school diploma [including GED], or greater than high school diploma), insurance (commercial, Medicare, Medicaid [including dual-eligibles], and uninsured/self-pay), number of clinic visits in 2015, primary language (English vs. other), connectedness to their primary care clinic using previously validated algorithm<sup>21</sup>, and comorbidity (Charlson comorbidity score, and individual indicators of depression, hypertension, coronary heart disease, osteoarthritis, and diabetes). To account for area-level differences from factors other than resources, we used data from the U.S. Census' American Community Survey (5-year estimates 2010-2015) and the USDA's Food Access Research Atlas: median household income, percent living in poverty, 'food desert' status [low-income, low food access census tract at 1/2 mile in urban areas and 10 miles in rural areas], unemployment rate, proportion of the area population living in group quarters (e.g., those living in a nursing facility unlikely to be exposed to area-level conditions), vehicle access, and housing segregation.<sup>22,23</sup>

### *Statistical analysis*

In this study, we wanted to evaluate the relationship between many resources types and cardiometabolic risk factors. A secondary goal of our study was to help

1  
2  
3 understand the relationship that specific geographic levels and resource types had  
4 with clinical outcomes. Because the nested structure of our data violate the  
5 statistical independence assumption that underlies parametric, regression-based  
6 variable selection approaches (such as forward, backward, or step-wise selection),  
7 and to avoid multiple hypothesis testing that may lead to the identification of  
8 spurious associations, we employed a non-parametric machine learning technique  
9 called variable selecting using random forest (VSURF) to screen through variables in  
10 the derivation set.<sup>24,25</sup> This was done using a derivation dataset, which consisted of a  
11 random partition of the entire dataset. Finally, we used multi-level modeling in the  
12 test set (not used in the derivation stage) to test a small number of candidate  
13 variables identified by VSURF as being most important to explaining variations in  
14 the derivation set. VSRUF is described in more detail in the technical appendix and  
15 eFigure 1.

### 36 Multi-level modeling

37  
38 In the test dataset, we fit multi-level linear mixed models to test the association  
39 between variables identified in the VSURF step and the outcome of interest. The BMI  
40 model included all study participants. The SBP model included those with a  
41 diagnosis of hypertension. The LDL model included those with common diagnoses  
42 (hypertension, diabetes, coronary heart disease, cerebrovascular disease, congestive  
43 heart failure) where LDL lowering is most beneficial. The HbA1c models included  
44 those with a diagnosis of diabetes. The models used fixed effects to adjust for age,  
45 gender, race/ethnicity, education, insurance, number of clinic visits, language, clinic  
46  
47  
48  
49  
50  
51  
52  
53  
54  
55  
56  
57

1  
2  
3 connectedness, comorbidity, and census tract level median household income,  
4  
5 poverty rates, 'food desert' status, unemployment, numbers living in group quarters,  
6  
7 vehicle access, and segregation. To account for clustering within practices, we  
8  
9 included a practice-level random effects term. To account for area-level clustering,  
10  
11 we used a ZIP-level random effects term. These were fit as crossed effects models  
12  
13 (i.e., we did not nest practices within ZIP codes) to allow for the fact that patients  
14  
15 are often seen in practices outside of their ZIP code of residence.  
16  
17  
18  
19  
20  
21

## 22 Falsification tests

23  
24 To reduce the possibility that observed associations due to other unmeasured  
25  
26 characteristics of the area, rather than the specific area resource tested, we also  
27  
28 conducted falsification analyses. To do this, we used the same modeling approach as  
29  
30 above, but tested for the association between area after school resources for  
31  
32 children and the outcome of interest. Our reasoning was that, since there was  
33  
34 unlikely to be any direct effect of afterschool resources for children on adult body  
35  
36 mass index, any observed association would reflect unmeasured area-  
37  
38 characteristics not appropriately adjusted for in our model (such as high levels of  
39  
40 civic engagement or community organization, or other beneficial resources).  
41  
42  
43  
44  
45  
46  
47

## 48 Variations in clinical management

49  
50 To help explore whether variations in the intensity of clinical management could  
51  
52 explain whether community resources were associated with health outcomes, we  
53  
54 also used the above modeling approach to test whether area resources were  
55  
56  
57

1  
2  
3 associated with SBP in those *without* a diagnosis of hypertension. The primary care  
4 network in the study has quality improvement program that emphasize the  
5 importance of SBP, LDL, and HbA1c control in appropriate clinical populations.  
6  
7 Since BMI (in any population) and SBP control in those without a diagnosis of  
8 hypertension are not included in these programs, we reasoned that area resources  
9  
10 may be more important when clinicians are not intensively attempting to impact an  
11 outcome. We focused on BMI and systolic blood pressure among those *without*  
12 hypertension for this because BMI and SBP are routinely measured at all practice  
13 visits for all patients.  
14  
15  
16  
17  
18  
19  
20  
21  
22  
23  
24  
25

26 Because of its mechanistically plausible relationship with BMI, we used the  
27 association between ZIP-level food resources and BMI as the primary outcome, with  
28 secondary analyses being the associations between other VSURF selected area  
29 resources and clinical outcomes.  
30  
31  
32  
33  
34  
35  
36  
37

### 38 Robustness checks

39  
40  
41  
42

43 In addition to the main analyses, we conducted a series of robustness checks that  
44 examined whether different specifications of resources in the area (e.g. resources  
45 per capita or resources per capita living in poverty) or different functional forms  
46 (e.g. including polynomial terms or using splines) would alter the observed  
47 associations between area-level resources and outcomes. We also conducted  
48 analyses restricted to those with indicators of lower socioeconomic status (high  
49  
50  
51  
52  
53  
54  
55  
56  
57

1  
2  
3 school diploma or lower educational attainment, living in a ZIP where > 15% of  
4 individuals are in poverty) to ensure the results were applicable to those most likely  
5 to utilize the resources studied.  
6  
7  
8  
9

10  
11  
12 A p-value of < 0.05 was taken to indicate statistical significance. Analyses were  
13 conducted in SAS Version 9.4 (Cary, NC), Stata 14 (College Station, TX), and R  
14 version 3.3.4 (Vienna, Austria).  
15  
16  
17  
18  
19

## 20 21 22 **Results**

23  
24 Overall, 123,355 participants were included in the study. All participants were  
25 eligible for the BMI analyses. Based on inclusion criteria, 43,509 were included in  
26 the hypertension analyses, 46,940 were included in the LDL analyses, and 13,127  
27 were included in the diabetes analyses. Demographic characteristics of the overall  
28 sample are presented in Table 1. Demographic characteristics of the samples used in  
29 the hypertension, LDL cholesterol, and diabetes analyses are presented in eTables 1-  
30 3. Overall, the mean age was 52.4 (SD 16.9) years, the sample was 41.5% male,  
31 82.1% non-Hispanic white, 5.8% non-Hispanic black, and 6.5% Hispanic. The  
32 median number of years participants were followed in our network was 9  
33 (intraquartile range (IQR): 3, 10), and the median number change of address per  
34 year followed was 0.1 (IQR 0.1, 0.25), suggesting that participants resided at their  
35 current address for the majority of their time in our network.  
36  
37  
38  
39  
40  
41  
42  
43  
44  
45  
46  
47  
48  
49  
50  
51  
52  
53  
54  
55  
56  
57  
58  
59  
60

1  
2  
3 In general, individuals living in areas with more resources were had lower  
4 educational attainment and higher rates of Medicaid insurance coverage (eTable 4).  
5  
6  
7  
8 Maps depicting the distribution of the resources are presented in Figure 1 and  
9  
10 eFigures 2-3.  
11  
12  
13  
14

15 The mean BMI in the sample was 27.8 (SD 6.2) kg/m<sup>2</sup>. In the hypertension analyses,  
16  
17 the mean BP was 131.6 (SD 15.8) mmHg. In the LDL analyses, the mean LDL was  
18  
19 102.9 (SD 39.8) mg/dL, and in the diabetes analyses the mean HbA1c was 7.1 (SD  
20  
21 1.5)%.  
22  
23  
24  
25

26 Among geographic levels assessed, all resources selected were at the ZIP level  
27  
28 (Table 2). For the BMI analyses, the selected resources were ZIP level food  
29  
30 resources, ZIP level employment resources, and ZIP level nutrition resources. For  
31  
32 hypertension analyses, the selected resources were ZIP housing and ZIP nutrition  
33  
34 resources. For LDL analyses, the only selected resource was ZIP nutrition resources.  
35  
36 For diabetes analyses, the selected resources were ZIP mental health and ZIP  
37  
38 substance use resources.  
39  
40  
41  
42  
43  
44

45 For the BMI analyses, we tested the association between selected resources and  
46  
47 BMI, adjusting for the factors described in the statistical analysis section, and  
48  
49 accounting for clustering at the clinic and ZIP level with multi-level linear mixed  
50  
51 models. We found that resources associated with lower BMI included more food  
52  
53 resources (-0.08 kg/m<sup>2</sup> per additional resource, 95% Confidence Interval[CI] -0.13  
54  
55  
56  
57



1  
2  
3 to -0.03 kg/m<sup>2</sup>, p= .001), employment resources (-0.05 kg/m<sup>2</sup>, 95%CI -0.11 to -0.002  
4  
5 kg/m<sup>2</sup>, p=.04), and nutrition resources (-0.07 kg/m<sup>2</sup>, 95%CI -0.13 to -0.01 kg/m<sup>2</sup>,  
6  
7 p=.02) (full models for these and all robustness checks in eAppendix tables 5-16).

8  
9  
10 Table 3 compares mean BMI and obesity prevalence at selected numbers of  
11  
12 resources, adjusted for the other factors in the model. For example, the mean BMI in  
13  
14 neighborhoods with the median (0) number of food resources was 27.8 kg/m<sup>2</sup>,  
15  
16 while the mean BMI in neighborhoods in the 75<sup>th</sup> percentile (3 resources) was 27.5  
17  
18 kg/m<sup>2</sup>, and the 90<sup>th</sup> percentile (8 resources) was 27.1 kg/m<sup>2</sup>. Falsification tests  
19  
20 found the expected lack of association between afterschool resources and BMI  
21  
22 (p=.67).  
23  
24  
25  
26  
27  
28

29 Robustness checks found that our results did not vary substantially with other  
30  
31 specifications of area-level resources (eTables 5-7).  
32  
33  
34  
35

36 In the hypertension analyses, neither housing resources (-0.05 mm Hg per  
37  
38 additional resource, 95%CI -0.16 to 0.06 mm Hg, p=.41) nor nutrition resources  
39  
40 (0.01 mm Hg, 95%CI -0.13 to 0.16 mm Hg, p=.87) were associated with systolic  
41  
42 blood pressure after adjustment for individual level and area level characteristics. In  
43  
44 LDL analyses, nutrition resources (0.10 mg/dL per additional resource, 95%CI -0.36  
45  
46 to 0.55 mg/dL, p=.67) were not associated with LDL cholesterol in adjusted models.  
47  
48  
49 In diabetes analyses, neither substance abuse resources (-0.003% per additional  
50  
51 resource, 95%CI -0.03 to 0.02%, p=.86) nor mental health resources were  
52  
53 associated with HbA1c (-0.003 %, 95%CI -0.03 to 0.02%, p=.76).  
54  
55  
56  
57

1  
2  
3  
4  
5  
6 In analyses looking at systolic blood pressure among those without a diagnosis of  
7 hypertension (i.e., those with no reason for clinical management of blood pressure),  
8 food resources were associated with lower systolic blood pressure in linear mixed  
9 models adjusted for the same factors as above (-0.08 mm Hg per additional  
10 resource, 95%CI -0.15 to -0.01 mm Hg,  $p=.03$ ). Mean systolic blood pressure was  
11 approximately 1 mm Hg lower at the 95<sup>th</sup> percentile (118.9 mm Hg) of food  
12 resources compared with the 50<sup>th</sup> percentile (119.8 mm Hg).  
13  
14  
15  
16  
17  
18  
19  
20  
21  
22  
23

24 Full models for all analyses are presented in eTables 8-16.  
25  
26  
27  
28

## 29 Discussion

30  
31 This study assessed the relationship among area resources and cardiometabolic risk  
32 factors. We found that increasing numbers of food, employment, and nutrition  
33 resources was associated with lower BMI, and lower systolic blood pressure among  
34 those without hypertension. The magnitude of the difference was meaningful at the  
35 population level, as the 0.7 kg/m<sup>2</sup> difference in BMI between individuals in a well-  
36 resourced versus poorly resourced ZIP is similar to the 0.6 increase kg/m<sup>2</sup> in BMI in  
37 the overall U.S. population from 2006 to 2016.<sup>26</sup>  
38  
39  
40  
41  
42  
43  
44  
45  
46  
47  
48  
49

50 Conversely, we found that area resources were not associated with systolic blood  
51 pressure among those with hypertension, LDL cholesterol among those with an  
52 indication for LDL lowering, or hemoglobin A1c among those with diabetes. This  
53  
54  
55  
56  
57

1  
2  
3 suggests that the relationship between area resources and cardiometabolic risk  
4  
5 factors may vary based on whether these factors are targets of intensive clinical  
6  
7 management.  
8  
9

10  
11  
12 This study enhances our knowledge regarding the association of area-level factors  
13  
14 and cardiometabolic risk factors. Prior studies have consistently found that adverse  
15  
16 area-level factors, such as poverty, are associated with increased cardiometabolic  
17  
18 risk, even when adjusting for individual-level factors, such as income.<sup>2,27-29</sup>  
19

20  
21  
22 However, we did not know whether the presence of area resources that might  
23  
24 plausibly support health, such as food and nutrition resources, would be associated  
25  
26 with lower cardiometabolic risk.  
27  
28

29  
30  
31 The positive and negative associations between community resources and  
32  
33 cardiometabolic risk factors may have important public health implications. The  
34  
35 association between increased area resources and lower BMI suggests that efforts to  
36  
37 help link patients to community resources, and to help improve the resources  
38  
39 landscape within communities, may be a successful strategy for improving  
40  
41 population health, particularly for risk factors such as BMI where clinical  
42  
43 management may not be prioritized.<sup>13,14,30</sup> This is reinforced by the finding that SBP,  
44  
45 among those without hypertension, is lower in those living in areas with more  
46  
47 resources. Since SBP does not come under clinical management for those without  
48  
49 hypertension, this finding supports the potential for area resources to impact  
50  
51 population health, and is consistent with guidelines that recommend lifestyle, rather  
52  
53  
54  
55  
56  
57

1  
2  
3 than pharmacologic, approaches to pre-hypertension treatment.<sup>31</sup> Future work in  
4  
5 this area should investigate whether interventions that link individuals to area  
6  
7 resources show clinical benefits.  
8  
9

10  
11  
12 Our finding should be interpreted in light of several limitations. We did not have  
13  
14 access to data regarding use of the resources. This means that we do not know  
15  
16 whether individuals made use of the resources in their community. In light of this,  
17  
18 the association between ZIP-level resources and outcomes could be viewed  
19  
20 analogously to an 'encouragement design' intervention. This means that the  
21  
22 association estimated in this study is likely different than the association that would  
23  
24 be estimated if analyzing those who were known to use the resource. That  
25  
26 association is clearly of policy interest, and should be examined in future work.  
27  
28

29  
30 While we adjusted for several individual-level and area-level socioeconomic status  
31  
32 indicators in order to capture the multidimensional nature of socioeconomic status  
33  
34 and, thus, reduce confounding, it is possible that residual confounding, owing to  
35  
36 unmeasured characteristics, exists, which would tend to reduce the observed  
37  
38 associations between area-resources and outcomes. Additional unmeasured  
39  
40 covariates that could affect the observed associations include local culture, and the  
41  
42 quality of the resources available. Devising methodology to determine the quality of  
43  
44 the services provided to help meet health-related social needs is pressing, and will  
45  
46 be an important direction for future investigation. Next, our study was cross-  
47  
48 sectional, and thus we cannot establish time-ordering between the exposure and the  
49  
50 cardiometabolic outcomes. However, we think it is less likely that lower BMI would  
51  
52  
53  
54  
55  
56  
57

1  
2  
3 drive individuals into areas with more resources than vice versa, as areas with  
4  
5 higher resources tended to have other adverse features, such as lower income and  
6  
7 higher poverty, which are likely more salient considerations for those choosing  
8  
9 where to live. Finally, because of the relatively high residential stability within this  
10  
11 primary care population, we only examined the association between current area of  
12  
13 residence and the study outcomes. However, for those who do move, this could lead  
14  
15 to misclassification, which would tend to bias results to the null. These limitations  
16  
17 are balanced by several strengths. We had access to a detailed mapping of area  
18  
19 resources, along with detailed individual-level health information. Further, in  
20  
21 addition to the multi-level framework we used, the use of falsification tests  
22  
23 demonstrated that unadjusted area-level factors are not likely to explain the  
24  
25 observed results.  
26  
27  
28  
29  
30  
31  
32

33  
34 In summary, ZIP-level food, employment, and nutrition resources were associated  
35  
36 with BMI differences that were clinically meaningfully and statistically significant.  
37  
38 Further, the association between area resources and cardiometabolic risk factors  
39  
40 differed based on the specific risk factor. Investing in area resources and linkage  
41  
42 programs may be an important way to help reduce cardiometabolic risk for  
43  
44 vulnerable individuals, especially for situations not under intensive clinical  
45  
46 management.  
47  
48  
49  
50  
51  
52  
53  
54  
55  
56  
57

## Acknowledgements

**Competing Interest Statement:** All authors declare they have nothing to disclose

**Guarantor:** Seth A. Berkowitz had full access to all of the data in the study and takes full responsibility for the work as a whole, including the study design, access to data, the integrity of the data, the accuracy of the data analysis, and the decision to submit and publish the manuscript.

**Funding Statement:** Research reported in this publication was supported by the National Institute for Diabetes and Digestive and Kidney Disease of the National Institutes of Health, and the National Institute on Minority Health and Health Disparities of the National Institutes of Health under Award Numbers DP2MD010478 (SB), U54MD010724 (SB), and K23DK109200 (SAB). The content is solely the responsibility of the authors and does not necessarily represent the official views of the National Institutes of Health.

**Author Contribution List:** SAB conducted the data analysis, wrote the first draft of the manuscript, and is the guarantor of the article. SAB, EWF, and SJA conceived of the study. GR assisted with data analysis. SB, AV, and GR contributed to interpretation of results and critical revision of the manuscript for intellectual context. All authors (SAB, SB, AV, GR, EWF, and SJA) read and approved the final manuscript for submission.

**Data Sharing Statement:** Statistical code will be available concurrent with publication from the corresponding author. Owing to privacy concerns, study data cannot be made publically available. Study Protocol: Not available.

1  
2  
3  
4  
5  
6  
7  
8  
9  
10  
11  
12  
13  
14  
15  
16  
17  
18  
19  
20  
21  
22  
23  
24  
25  
26  
27  
28  
29  
30  
31  
32  
33  
34  
35  
36  
37  
38  
39  
40  
41  
42  
43  
44  
45  
46  
47  
48  
49  
50  
51  
52  
53  
54  
55  
56  
57  
58  
59  
60

For peer review only

## References

1. Centers for Disease Control and Prevention. Deaths and Mortality. <https://www.cdc.gov/nchs/fastats/deaths.htm>. Published March 5, 2018. Accessed March 19, 2018.
2. Havranek EP, Mujahid MS, Barr DA, et al. Social Determinants of Risk and Outcomes for Cardiovascular Disease: A Scientific Statement From the American Heart Association. *Circulation*. 2015;132(9):873-898. doi:10.1161/CIR.0000000000000228
3. Berkowitz SA, Baggett TP, Wexler DJ, Huskey KW, Wee CC. Food insecurity and metabolic control among U.S. adults with diabetes. *Diabetes Care*. 2013;36(10):3093-3099. doi:10.2337/dc13-0570
4. Berkowitz SA, Meigs JB, DeWalt D, et al. Material need insecurities, control of diabetes mellitus, and use of health care resources: results of the Measuring Economic Insecurity in Diabetes study. *JAMA Intern Med*. 2015;175(2):257-265. doi:10.1001/jamainternmed.2014.6888
5. Berkowitz SA, Berkowitz TSZ, Meigs JB, Wexler DJ. Trends in food insecurity for adults with cardiometabolic disease in the United States: 2005-2012. *PloS One*. 2017;12(6):e0179172. doi:10.1371/journal.pone.0179172
6. Seligman HK, Laraia BA, Kushel MB. Food insecurity is associated with chronic disease among low-income NHANES participants. *J Nutr*. 2010;140(2):304-310. doi:10.3945/jn.109.112573
7. Baer TE, Scherer EA, Richmond TK, Fleegler EW, Hassan A. Food Insecurity, Weight Status, and Perceived Nutritional and Exercise Barriers in an Urban Youth Population. *Clin Pediatr (Phila)*. 2018;57(2):152-160. doi:10.1177/0009922817693301
8. Morales ME, Berkowitz SA. The Relationship Between Food Insecurity, Dietary Patterns, and Obesity. *Curr Nutr Rep*. 2016;5(1):54-60. doi:10.1007/s13668-016-0153-y
9. Seligman HK, Schillinger D. Hunger and socioeconomic disparities in chronic disease. *N Engl J Med*. 2010;363(1):6-9. doi:10.1056/NEJMp1000072
10. Berkowitz SA, Seligman HK, Choudhry NK. Treat or eat: food insecurity, cost-related medication underuse, and unmet needs. *Am J Med*. 2014;127(4):303-310.e3. doi:10.1016/j.amjmed.2014.01.002



11. Keene DE, Guo M, Murillo S. "That wasn't really a place to worry about diabetes": Housing access and diabetes self-management among low-income adults. *Soc Sci Med* 1982. 2018;197:71-77. doi:10.1016/j.socscimed.2017.11.051
12. Hassan A, Blood EA, Pikcinglis A, et al. Youths' health-related social problems: concerns often overlooked during the medical visit. *J Adolesc Health Off Publ Soc Adolesc Med*. 2013;53(2):265-271. doi:10.1016/j.jadohealth.2013.02.024
13. Hassan A, Scherer EA, Pikcinglis A, et al. Improving Social Determinants of Health: Effectiveness of a Web-Based Intervention. *Am J Prev Med*. 2015;49(6):822-831. doi:10.1016/j.amepre.2015.04.023
14. Berkowitz SA, Hulberg AC, Standish S, Reznor G, Atlas SJ. Addressing Unmet Basic Resource Needs as Part of Chronic Cardiometabolic Disease Management. *JAMA Intern Med*. 2017;177(2):244-252. doi:10.1001/jamainternmed.2016.7691
15. Gottlieb LM, Wing H, Adler NE. A Systematic Review of Interventions on Patients' Social and Economic Needs. *Am J Prev Med*. July 2017. doi:10.1016/j.amepre.2017.05.011
16. Gottlieb LM, Hessler D, Long D, et al. Effects of Social Needs Screening and In-Person Service Navigation on Child Health: A Randomized Clinical Trial. *JAMA Pediatr*. 2016;170(11):e162521. doi:10.1001/jamapediatrics.2016.2521
17. Alley DE, Asomugha CN, Conway PH, Sanghavi DM. Accountable Health Communities--Addressing Social Needs through Medicare and Medicaid. *N Engl J Med*. 2016;374(1):8-11. doi:10.1056/NEJMp1512532
18. Bauer SR, Monuteaux MC, Fleegler EW. Geographic Disparities in Access to Agencies Providing Income-Related Social Services. *J Urban Health Bull N Y Acad Med*. 2015;92(5):853-863. doi:10.1007/s11524-015-9971-2
19. Fleegler E, J. Bottino C, Pikcinglis A, Baker B, Kistler E, Hassan A. Referral System Collaboration Between Public Health and Medical Systems: A Population Health Case Report. *Natl Acad Med Perspect Popul Health Case Rep*. May 2016.
20. Berkowitz SA, Traore CY, Singer DE, Atlas SJ. Evaluating area-based socioeconomic status indicators for monitoring disparities within health care systems: results from a primary care network. *Health Serv Res*. 2015;50(2):398-417. doi:10.1111/1475-6773.12229
21. Atlas SJ, Grant RW, Ferris TG, Chang Y, Barry MJ. Patient-physician connectedness and quality of primary care. *Ann Intern Med*. 2009;150(5):325-335.

- 1
  - 2
  - 3
  - 4
  - 5
  - 6
  - 7
  - 8
  - 9
  - 10
  - 11
  - 12
  - 13
  - 14
  - 15
  - 16
  - 17
  - 18
  - 19
  - 20
  - 21
  - 22
  - 23
  - 24
  - 25
  - 26
  - 27
  - 28
  - 29
  - 30
  - 31
  - 32
  - 33
  - 34
  - 35
  - 36
  - 37
  - 38
  - 39
  - 40
  - 41
  - 42
  - 43
  - 44
  - 45
  - 46
  - 47
  - 48
  - 49
  - 50
  - 51
  - 52
  - 53
  - 54
  - 55
  - 56
  - 57
  - 58
  - 59
  - 60
22. USDA Food Access Research Atlas Documentation. <https://www.ers.usda.gov/data-products/food-access-research-atlas/documentation/>. Accessed August 11, 2017.
23. Napierala J, Denton N. Measuring Residential Segregation With the ACS: How the Margin of Error Affects the Dissimilarity Index. *Demography*. 2017;54(1):285-309. doi:10.1007/s13524-016-0545-z
24. Genuer R, Poggi J-M, Tuleau-Malot C. Variable Selection Using Random Forests. *Pattern Recogn Lett*. 2010;31(14):2225–2236. doi:10.1016/j.patrec.2010.03.014
25. Genuer R, Poggi J-M, Tuleau-Malot C. VSURF: An R Package for Variable Selection Using Random Forests. *R J*. 2015;7(2):19-33.
26. Trends in adult body-mass index in 200 countries from 1975 to 2014: a pooled analysis of 1698 population-based measurement studies with 19·2 million participants. *The Lancet*. 2016;387(10026):1377-1396. doi:10.1016/S0140-6736(16)30054-X
27. Thomas AJ, Eberly LE, Davey Smith G, Neaton JD, Stamler J. Race/Ethnicity, Income, Major Risk Factors, and Cardiovascular Disease Mortality. *Am J Public Health*. 2005;95(8):1417-1423. doi:10.2105/AJPH.2004.048165
28. Diez Roux AV. Investigating Neighborhood and Area Effects on Health. *Am J Public Health*. 2001;91(11):1783-1789. doi:10.2105/AJPH.91.11.1783
29. Kelli HM, Hammadah M, Ahmed H, et al. Association Between Living in Food Deserts and Cardiovascular Risk. *Circ Cardiovasc Qual Outcomes*. 2017;10(9):e003532. doi:10.1161/CIRCOUTCOMES.116.003532
30. Garg A, Toy S, Tripodis Y, Silverstein M, Freeman E. Addressing social determinants of health at well child care visits: a cluster RCT. *Pediatrics*. 2015;135(2):e296-304. doi:10.1542/peds.2014-2888
31. Whelton PK, Carey RM, Aronow WS, et al. 2017 ACC/AHA/AAPA/ABC/ACPM/AGS/APhA/ASH/ASPC/NMA/PCNA Guideline for the Prevention, Detection, Evaluation, and Management of High Blood Pressure in Adults: A Report of the American College of Cardiology/American Heart Association Task Force on Clinical Practice Guidelines. *Hypertension*. January 2017:HYP.0000000000000065. doi:10.1161/HYP.0000000000000065

Table 1: Demographics of study sample

|                                       | N=123,355              |
|---------------------------------------|------------------------|
|                                       | Mean (SD) or n (%)     |
| Age                                   | 52.42 (16.89)          |
| Male                                  | 51665 (41.9)           |
| Race/ethnicity                        |                        |
| Asian/Multi/Other                     | 6880 (5.6)             |
| Non-Hispanic Black                    | 7203 (5.8)             |
| Hispanic                              | 8039 (6.5)             |
| Non-Hispanic White                    | 101233 (82.1)          |
| Education                             |                        |
| College or >                          | 56302 (45.6)           |
| High School Diploma                   | 36572 (29.6)           |
| Less than High School Diploma         | 18051 (14.6)           |
| Unknown/Declined                      | 12430 (10.1)           |
| Insurance                             |                        |
| Private                               | 75787 (61.4)           |
| Medicare and Medicaid                 | 8602 (7.0)             |
| Medicaid                              | 20934 (17.0)           |
| Medicare                              | 17911 (14.5)           |
| Self-pay                              | 121 (0.1)              |
| English is Primary Language           | 112720 (91.4)          |
| History of Hypertension               | 43509 (35.3)           |
| History of Coronary Heart Disease     | 9275 (7.5)             |
| History of Diabetes Mellitus          | 13127 (10.6)           |
| History of Depression                 | 10300 (8.3)            |
| History of Osteoarthritis             | 23707 (19.2)           |
| Charlson Comorbidity Score            | 1.72 (2.23)            |
| Clinic Visits                         | 6.57 (5.77)            |
| Clinic Connectedness                  |                        |
| Connected to specific physician       | 80345 (65.1)           |
| Connected to specific practice        | 34018 (27.6)           |
| Other                                 | 8992 (7.3)             |
| Lives in Urban Area                   | 91095 (96.4)           |
| ZIP-level Unemployment Rate, %        | 4.71 (1.60)            |
| ZIP-level Median Household Income, \$ | 82309.16<br>(31758.79) |
| ZIP-level Poverty Rate, %             | 8.70 (6.72)            |
| ZIP-level Segregation*                | 69.51 (21.05)          |
| Body Mass Index, kg/m <sup>2</sup>    | 27.84 (6.24)           |
| Systolic Blood Pressure, mm Hg        | 124.36 (14.96)         |

|                        |                |
|------------------------|----------------|
| LDL cholesterol, mg/dL | 110.83 (39.95) |
| Hemoglobin A1c, %      | 5.94 (1.22)    |

\*Segregation index is a dissimilarity measure of the extent to which groups other than non-Hispanic whites are distributed like non-Hispanic whites. 0 represents complete integration and 100 represents complete segregation.

For peer review only

Table 2: Distribution of the Number of Resources in the Selected Resource Categories

| BMI Analyses            |         |                             |                             |                             |                             |                             |         |
|-------------------------|---------|-----------------------------|-----------------------------|-----------------------------|-----------------------------|-----------------------------|---------|
| Resource*               | Minimum | 25 <sup>th</sup> Percentile | 50 <sup>th</sup> Percentile | 75 <sup>th</sup> Percentile | 90 <sup>th</sup> Percentile | 95 <sup>th</sup> Percentile | Maximum |
| Food                    | 0       | 0                           | 0                           | 3                           | 8                           | 11                          | 27      |
| Employment              | 0       | 0                           | 0                           | 4                           | 13                          | 18                          | 33      |
| Nutrition               | 0       | 0                           | 0                           | 3                           | 6                           | 12                          | 21      |
| Hypertension Analyses   |         |                             |                             |                             |                             |                             |         |
| Housing                 | 0       | 0                           | 0                           | 2                           | 8                           | 8                           | 23      |
| Nutrition               | 0       | 0                           | 0                           | 3                           | 6                           | 12                          | 21      |
| LDL Analyses            |         |                             |                             |                             |                             |                             |         |
| Nutrition               | 0       | 0                           | 0                           | 3                           | 6                           | 12                          | 21      |
| Diabetes Analyses       |         |                             |                             |                             |                             |                             |         |
| Mental health           | 0       | 0                           | 0                           | 2                           | 5                           | 6                           | 21      |
| Substance use resources | 0       | 0                           | 1                           | 2                           | 5                           | 6                           | 23      |

\*All resources assessed at ZIP level; table represents counts of each resource type

Table 3: Estimated BMI, in kg/m<sup>2</sup>, by resource level

| ZIP-level Food Resources       |       |
|--------------------------------|-------|
| 50 <sup>th</sup> Percentile    | 27.78 |
| 75 <sup>th</sup> Percentile    | 27.53 |
| 90 <sup>th</sup> Percentile    | 27.11 |
| 95 <sup>th</sup> Percentile    | 26.85 |
| ZIP-level Employment Resources |       |
| 50 <sup>th</sup> Percentile    | 27.78 |
| 75 <sup>th</sup> Percentile    | 27.56 |
| 90 <sup>th</sup> Percentile    | 27.07 |
| 95 <sup>th</sup> Percentile    | 26.80 |
| ZIP-level Nutrition Resources  |       |
| 50 <sup>th</sup> Percentile    | 27.75 |
| 75 <sup>th</sup> Percentile    | 27.54 |
| 90 <sup>th</sup> Percentile    | 27.32 |
| 95 <sup>th</sup> Percentile    | 26.89 |

Estimates created using least-squares means from fitted multi-level models. The models used fixed effects to adjust for age, gender, race/ethnicity, education, insurance, number of clinic visits, language, clinic connectedness, comorbidity, and census tract level median household income, poverty rates, 'food desert' status, unemployment, numbers living in group quarters, vehicle access, and segregation. To account for clustering within practices, we included a practice-level random effects term. To account for area-level clustering, we used a ZIP-level random effects term. These were fit as crossed effects models (i.e., we did not nest practices within ZIP codes) to allow for the fact that patients are often seen in practices outside of their ZIP code of residence.

Figure 1: Food Resource Density by ZIP

For peer review only

1  
2  
3  
4  
5  
6  
7  
8  
9  
10  
11  
12  
13  
14  
15  
16  
17  
18  
19  
20  
21  
22  
23  
24  
25  
26  
27  
28  
29  
30  
31  
32  
33  
34  
35  
36  
37  
38  
39  
40  
41  
42  
43  
44  
45  
46  
47  
48  
49  
50  
51  
52  
53  
54  
55  
56  
57  
58  
59  
60

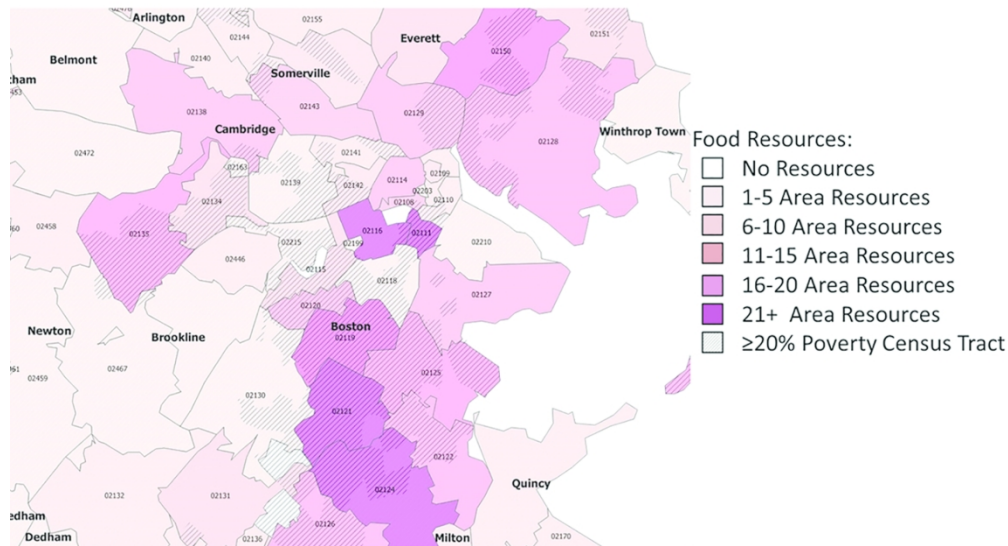

Figure 1

180x101mm (300 x 300 DPI)



1  
2  
3 eAppendix for Association Between Area Resources and Cardiometabolic Risk: A Machine  
4  
5 Learning and Multi-Level Modeling Analysis  
6  
7  
8  
9  
10  
11  
12  
13  
14  
15  
16  
17  
18  
19  
20  
21  
22  
23  
24  
25  
26  
27  
28  
29  
30  
31  
32  
33  
34  
35  
36  
37  
38  
39  
40  
41  
42  
43  
44  
45  
46  
47  
48  
49  
50  
51  
52  
53  
54  
55  
56  
57  
58  
59  
60

## Technical Appendix

### VSURF

The foundation of the VSURF technique is the decision tree (eFigure 1).<sup>21</sup> To construct a single decision tree, the procedure selects a random subset of variables from the total number of available variables, and selects a variable that best explains the variation in outcome of a bootstrap resample drawn from the derivation sample. For the next split, the variable that best explains the variation within each ‘branch’ of the tree created in the first split is selected. This process is continued until optimal separation is achieved. A ‘forest’ is grown by repeating this process 2000 times, each time randomly drawing a subset of variables and bootstrap resample of the derivation cohort. In the VSURF procedure, 50 forests of 2000 trees were grown in the initial ‘thresholding’ step, which focuses on removing irrelevant variables. Then, 25 forests of 2000 trees, using the remaining variables, were grown to select all variables associated with the response. Finally, 25 forests of 2000 trees were grown, selecting among the remaining variables to eliminate redundancy. After all three steps were completed, we selected up to the top three area resources, as indicated by variable importance factors in the final step, for hypothesis testing in the independent, ‘testing’ sample.

A major advantage of VSURF is that it directly addresses the correlation among variables, as the single best variable is selected at each split and thus the explanatory power is not divided amongst two or more related variables, as in linear regression. Secondly, VSURF allows one to screen through a number of candidate variables while preserving type I error rate, as statistical

1  
2  
3 significance testing is not used in the selection of variables, unlike p-value-based selection  
4  
5 algorithms.  
6  
7  
8  
9  
10  
11  
12  
13  
14  
15  
16  
17  
18  
19  
20  
21  
22  
23  
24  
25  
26  
27  
28  
29  
30  
31  
32  
33  
34  
35  
36  
37  
38  
39  
40  
41  
42  
43  
44  
45  
46  
47  
48  
49  
50  
51  
52  
53  
54  
55  
56  
57  
58  
59  
60

eFigure 1: Depiction of the Variable Selection Using Random Forest (VSURF) Method



From a random subset of variables and a bootstrap resample of individuals in the derivation cohort, a decision tree that optimally splits the sample is created. This process is repeated in a second bootstrap resample with a second randomly selected subset of variables, and so on until  $n$  trees ( $n=2000$  in this study) are aggregated to create one forest. The forest-growing procedure is repeated 50 times. Then, using variable importance factors, which indicate the variables that are most useful in minimizing the error of predicted values in the 'out-of-bag' sample (those observations that, due to chance, were not selected in the bootstrap resample). After removing the least important variables, the entire process is repeated again, this time growing 25 forests of 2000 trees, in the 'interpretation' step, which focuses on selecting all variables associated with the response. Finally, to deal with correlations between variables, the process is repeated again, growing 25 more forests of 2000 trees, in the 'prediction' step, which focuses on removing redundancy in the final set of variables.

eFigure 2: Employment Resources by ZIP



Review only

1  
2  
3  
4  
5  
6  
7  
8  
9  
10  
11  
12  
13  
14  
15  
16  
17  
18  
19  
20  
21  
22  
23  
24  
25  
26  
27  
28  
29  
30  
31  
32  
33  
34  
35  
36  
37  
38  
39  
40  
41  
42  
43  
44  
45  
46  
47  
48  
49  
50  
51  
52  
53  
54  
55  
56  
57  
58  
59  
60

eFigure 3: Nutrition Resources by ZIP

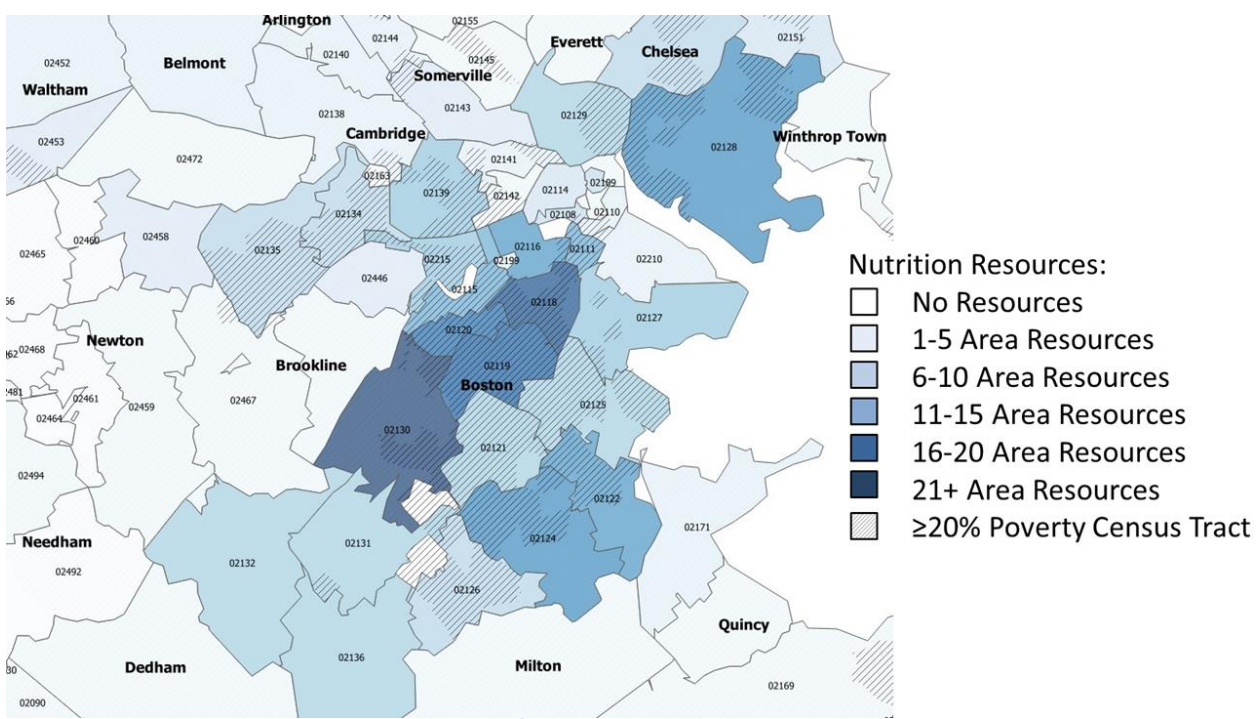

review only

eTable 1: Demographics for Hypertension Study Sample

|                                       | N=43,509            |
|---------------------------------------|---------------------|
|                                       | Mean (SD) or n (%)  |
| Age                                   | 64.67 (14.05)       |
| Male                                  | 21299 (49.0)        |
| Race/ethnicity                        |                     |
| Asian/Multi/Other                     | 1755 (4.0)          |
| Non-Hispanic Black                    | 3138 (7.2)          |
| Hispanic                              | 1983 (4.6)          |
| Non-Hispanic White                    | 36633 (84.2)        |
| Education                             |                     |
| College or >                          | 15660 (36.0)        |
| High School Diploma                   | 15900 (36.5)        |
| Less than High School Diploma         | 7422 (17.1)         |
| Unknown/Declined                      | 4527 (10.4)         |
| Insurance                             |                     |
| Private                               | 17256 (39.7)        |
| Medicare and Medicaid                 | 6200 (14.2)         |
| Medicaid                              | 6292 (14.5)         |
| Medicare                              | 13756 (31.6)        |
| Self-pay                              | 5 (0.0)             |
| English is Primary Language           | 39492 (90.8)        |
| History of Coronary Heart Disease     | 8373 (19.2)         |
| History of Diabetes Mellitus          | 11085 (25.5)        |
| History of Depression                 | 4745 (10.9)         |
| History of Osteoarthritis             | 14931 (34.3)        |
| Charlson Comorbidity Score            | 3.22 (2.57)         |
| Clinic Visits                         | 9.58 (6.77)         |
| Clinic Connectedness                  |                     |
| Connected to specific physician       | 36233 (83.3)        |
| Connected to specific practice        | 6978 (16.0)         |
| Other                                 | 298 (0.7)           |
| Lives in Urban Area                   | 32075 (96.4)        |
| ZIP-level Unemployment Rate, %        | 4.85 (1.63)         |
| ZIP-level Median Household Income, \$ | 80247.61 (31190.75) |
| ZIP-level Poverty Rate, %             | 8.67 (6.63)         |
| ZIP-level Segregation                 | 69.19 (21.92)       |
| Body Mass Index, kg/m <sup>2</sup>    | 29.68 (6.40)        |
| History of Obesity                    | 19314 (45.2)        |
| Systolic Blood Pressure, mm Hg        | 131.60 (15.75)      |

1  
2  
3  
4  
5  
6  
7  
8  
9  
10  
11  
12  
13  
14  
15  
16  
17  
18  
19  
20  
21  
22  
23  
24  
25  
26  
27  
28  
29  
30  
31  
32  
33  
34  
35  
36  
37  
38  
39  
40  
41  
42  
43  
44  
45  
46  
47  
48  
49  
50  
51  
52  
53  
54  
55  
56  
57  
58  
59  
60

|                        |                |
|------------------------|----------------|
| LDL cholesterol, mg/dL | 102.73 (39.82) |
| Hemoglobin A1c, %      | 6.25 (1.34)    |

For peer review only



eTable 2: Demographics for LDL Study Sample

|                                       | N=46940             |
|---------------------------------------|---------------------|
|                                       | Mean (SD) or n (%)  |
| Age                                   | 63.96 (14.33)       |
| Male                                  | 22916 (48.8)        |
| Race/ethnicity                        |                     |
| Asian/Multi/Other                     | 1971 (4.2)          |
| Non-Hispanic Black                    | 3401 (7.2)          |
| Hispanic                              | 2285 (4.9)          |
| Non-Hispanic White                    | 39283 (83.7)        |
| Education                             |                     |
| College or >                          | 16940 (36.1)        |
| High School Diploma                   | 17032 (36.3)        |
| Less than High School Diploma         | 8075 (17.2)         |
| Unknown/Declined                      | 4893 (10.4)         |
| Insurance                             |                     |
| Private                               | 18909 (40.3)        |
| Medicare and Medicaid                 | 6561 (14.0)         |
| Medicaid                              | 7169 (15.3)         |
| Medicare                              | 14296 (30.5)        |
| Self-pay                              | 5 (0.0)             |
| English is Primary Language           | 42468 (90.5)        |
| History of Hypertension               | 43509 (92.7)        |
| History of Coronary Heart Disease     | 9275 (19.8)         |
| History of Diabetes Mellitus          | 13127 (28.0)        |
| History of Depression                 | 5160 (11.0)         |
| History of Osteoarthritis             | 15695 (33.4)        |
| Charlson Comorbidity Score            | 3.14 (2.54)         |
| Clinic Visits                         | 9.46 (6.71)         |
| Clinic Connectedness                  |                     |
| Connected to specific physician       | 38851 (82.8)        |
| Connected to specific practice        | 7746 (16.5)         |
| Other                                 | 343 (0.7)           |
| Lives in Urban Area                   | 34532 (96.4)        |
| ZIP-level Unemployment Rate, %        | 4.86 (1.63)         |
| ZIP-level Median Household Income, \$ | 80079.26 (31173.63) |
| ZIP-level Poverty Rate, %             | 8.72 (6.64)         |
| ZIP-level Segregation                 | 68.98 (21.98)       |
| Body Mass Index, kg/m <sup>2</sup>    | 29.63 (6.42)        |
| History of Obesity                    | 20611 (44.7)        |
| Systolic Blood Pressure, mm Hg        | 130.88 (15.75)      |

1  
2  
3  
4  
5  
6  
7  
8  
9  
10  
11  
12  
13  
14  
15  
16  
17  
18  
19  
20  
21  
22  
23  
24  
25  
26  
27  
28  
29  
30  
31  
32  
33  
34  
35  
36  
37  
38  
39  
40  
41  
42  
43  
44  
45  
46  
47  
48  
49  
50  
51  
52  
53  
54  
55  
56  
57  
58  
59  
60

|                        |                |
|------------------------|----------------|
| LDL cholesterol, mg/dL | 102.85 (39.81) |
| Hemoglobin A1c, %      | 6.28 (1.36)    |

For peer review only

eTable 3: Demographics for Diabetes Study Sample

|                                       | N=13127             |
|---------------------------------------|---------------------|
|                                       | Mean (SD) or n (%)  |
| Age                                   | 64.12 (14.10)       |
| Male                                  | 6722 (51.2)         |
| Race/ethnicity                        |                     |
| Asian/Multi/Other                     | 729 (5.6)           |
| Non-Hispanic Black                    | 1415 (10.8)         |
| Hispanic                              | 986 (7.5)           |
| Non-Hispanic White                    | 9995 (76.1)         |
| Education                             |                     |
| College or >                          | 3691 (28.1)         |
| High School Diploma                   | 5115 (39.0)         |
| Less than High School Diploma         | 3085 (23.5)         |
| Unknown/Declined                      | 1236 (9.4)          |
| Insurance                             |                     |
| Private                               | 4247 (32.4)         |
| Medicare and Medicaid                 | 2609 (19.9)         |
| Medicaid                              | 2654 (20.2)         |
| Medicare                              | 3617 (27.6)         |
| Self-pay                              | 0 (0.0)             |
| English is Primary Language           | 11138 (84.8)        |
| History of Hypertension               | 11085 (84.4)        |
| History of Coronary Heart Disease     | 3316 (25.3)         |
| History of Diabetes Mellitus          | 13127 (100.0)       |
| History of Depression                 | 1685 (12.8)         |
| History of Osteoarthritis             | 4605 (35.1)         |
| Charlson Comorbidity Score            | 4.34 (2.94)         |
| Clinic Visits                         | 11.59 (7.52)        |
| Clinic Connectedness                  |                     |
| Connected to specific physician       | 10778 (82.1)        |
| Connected to specific practice        | 2234 (17.0)         |
| Other                                 | 115 (0.9)           |
| Lives in Urban Area                   | 9467 (97.4)         |
| ZIP-level Unemployment Rate, %        | 5.24 (1.67)         |
| ZIP-level Median Household Income, \$ | 72660.30 (28239.05) |
| ZIP-level Poverty Rate, %             | 10.19 (6.83)        |
| ZIP-level Segregation                 | 63.62 (23.80)       |
| Body Mass Index, kg/m <sup>2</sup>    | 31.48 (6.85)        |
| History of Obesity                    | 7427 (57.7)         |
| Systolic Blood Pressure, mm Hg        | 130.17 (16.09)      |

1  
2  
3  
4  
5  
6  
7  
8  
9  
10  
11  
12  
13  
14  
15  
16  
17  
18  
19  
20  
21  
22  
23  
24  
25  
26  
27  
28  
29  
30  
31  
32  
33  
34  
35  
36  
37  
38  
39  
40  
41  
42  
43  
44  
45  
46  
47  
48  
49  
50  
51  
52  
53  
54  
55  
56  
57  
58  
59  
60

|                        |               |
|------------------------|---------------|
| LDL cholesterol, mg/dL | 89.25 (37.45) |
| Hemoglobin A1c, %      | 7.08 (1.52)   |

For peer review only

eTable 4: Demographics of study sample by number of food resources in ZIP code tabulation area

|                                       | 0 food resources    | 1 to 7 food resources | ≥8 food resources   | p      |
|---------------------------------------|---------------------|-----------------------|---------------------|--------|
|                                       | N=65011             | N=42794               | N=13028             |        |
|                                       | Mean (SD) or n (%)  | Mean (SD) or n (%)    | Mean (SD) or n (%)  |        |
| Age                                   | 53.93 (16.13)       | 51.05 (17.69)         | 47.95 (16.92)       | <0.001 |
| Male                                  | 28050 (43.1)        | 17330 (40.5)          | 5163 (39.6)         | <0.001 |
| Race/ethnicity                        |                     |                       |                     | <0.001 |
| Asian/Multi/Other                     | 3559 (5.5)          | 2501 (5.8)            | 709 (5.4)           |        |
| Non-Hispanic Black                    | 2553 (3.9)          | 2710 (6.3)            | 1605 (12.3)         |        |
| Hispanic                              | 2306 (3.5)          | 2859 (6.7)            | 2707 (20.8)         |        |
| Non-Hispanic White                    | 56593 (87.1)        | 34724 (81.1)          | 8007 (61.5)         |        |
| Education                             |                     |                       |                     | <0.001 |
| College or >                          | 31782 (48.9)        | 18895 (44.2)          | 4837 (37.1)         |        |
| High School Diploma                   | 18400 (28.3)        | 13355 (31.2)          | 3767 (28.9)         |        |
| Less than High School Diploma         | 7373 (11.3)         | 6762 (15.8)           | 3449 (26.5)         |        |
| Unknown/Declined                      | 7456 (11.5)         | 3782 (8.8)            | 975 (7.5)           |        |
| Insurance                             |                     |                       |                     | <0.001 |
| Private                               | 44051 (67.8)        | 24062 (56.2)          | 6600 (50.7)         |        |
| Medicare and Medicaid                 | 3485 (5.4)          | 3551 (8.3)            | 1188 (9.1)          |        |
| Medicaid                              | 7319 (11.3)         | 9011 (21.1)           | 4075 (31.3)         |        |
| Medicare                              | 10128 (15.6)        | 6093 (14.2)           | 1149 (8.8)          |        |
| Self-pay                              | 28 (0.0)            | 77 (0.2)              | 16 (0.1)            |        |
| English is Primary Language           | 61559 (94.7)        | 38982 (91.1)          | 9923 (76.2)         | <0.001 |
| History of Hypertension               | 22195 (34.1)        | 15367 (35.9)          | 4342 (33.3)         | <0.001 |
| History of Coronary Heart Disease     | 4663 (7.2)          | 3385 (7.9)            | 817 (6.3)           | <0.001 |
| History of Cerebrovascular Disease    | 1628 (2.5)          | 1148 (2.7)            | 316 (2.4)           | 0.114  |
| History of Congestive Heart Failure   | 1941 (3.0)          | 1793 (4.2)            | 460 (3.5)           | <0.001 |
| History of Diabetes Mellitus          | 5735 (8.8)          | 4757 (11.1)           | 1735 (13.3)         | <0.001 |
| History of Depression                 | 4598 (7.1)          | 4024 (9.4)            | 1377 (10.6)         | <0.001 |
| History of Osteoarthritis             | 12179 (18.7)        | 8386 (19.6)           | 2331 (17.9)         | <0.001 |
| Charlson Comorbidity Score            | 1.70 (2.17)         | 1.72 (2.28)           | 1.56 (2.15)         | <0.001 |
| Clinic Visits                         | 5.93 (5.18)         | 7.14 (6.21)           | 7.19 (6.11)         | <0.001 |
| Clinic Connectedness                  |                     |                       |                     | <0.001 |
| Connected to specific physician       | 41292 (63.5)        | 28457 (66.5)          | 8593 (66.0)         |        |
| Connected to specific practice        | 14727 (22.7)        | 14337 (33.5)          | 4435 (34.0)         |        |
| Other                                 | 8992 (13.8)         | 0 (0.0)               | 0 (0.0)             |        |
| Lives in Urban Area                   | 52165 (94.3)        | 29291 (99.4)          | 7118 (99.9)         | <0.001 |
| ZIP-level Unemployment Rate, %        | 4.27 (1.41)         | 4.89 (1.51)           | 5.82 (1.83)         | <0.001 |
| ZIP-level Median Household Income, \$ | 96937.11 (34242.61) | 71648.83 (21514.21)   | 58606.22 (17651.59) | <0.001 |

|                                    |                |                |                |        |
|------------------------------------|----------------|----------------|----------------|--------|
| ZIP-level Poverty Rate, %          | 4.91 (4.58)    | 11.12 (6.26)   | 15.94 (5.58)   | <0.001 |
| ZIP-level Segregation              | 80.59 (15.85)  | 65.17 (15.29)  | 39.16 (20.13)  | <0.001 |
| Body Mass Index, kg/m <sup>2</sup> | 27.64 (6.03)   | 27.82 (6.34)   | 28.30 (6.63)   | <0.001 |
| History of Obesity                 | 18693 (30.1)   | 12765 (30.8)   | 4148 (33.2)    | <0.001 |
| Systolic Blood Pressure, mm Hg     | 124.47 (14.92) | 124.27 (15.03) | 123.44 (14.80) | <0.001 |
| LDL cholesterol, mg/dL             | 112.17 (42.48) | 109.92 (37.14) | 108.83 (35.34) | <0.001 |
| Hemoglobin A1c, %                  | 5.86 (1.12)    | 5.98 (1.25)    | 6.13 (1.43)    | <0.001 |

For peer review only

1  
2  
3 Robustness checks (eTable 5-7)  
4  
5  
6

7 Results from analyses, adjusted for the same factors as in main model presented in the manuscript,  
8 comparing the association of food resources and BMI with different specifications of ZIP-level food  
9 resources (count, count per capita, and count per capita living in poverty) show that the association  
10 between more area food resources and lower BMI is robust to different specifications of number of  
11 resources  
12

13  
14 eTable 5: Analyses comparing the association of food resources and BMI with different specifications  
15 of area-resources

|                                                                                                                                                           |                                                                                                                                                     |                                                                                                                                                                       |
|-----------------------------------------------------------------------------------------------------------------------------------------------------------|-----------------------------------------------------------------------------------------------------------------------------------------------------|-----------------------------------------------------------------------------------------------------------------------------------------------------------------------|
| 16 Estimated difference in BMI associated<br>17 with 1 additional ZIP-level resource (95%<br>18 CI), kg/m <sup>2</sup><br>19 (main model from manuscript) | 20 Estimated difference in<br>21 BMI associated with 1<br>22 additional ZIP-level<br>23 resource per 10000 people<br>24 (95% CI), kg/m <sup>2</sup> | 25 Estimated difference in BMI<br>26 associated with 1 additional<br>27 ZIP-level resource per 10000<br>28 people living in poverty<br>29 (95% CI), kg/m <sup>2</sup> |
| 30 -0.08 (-0.13 to -0.03)                                                                                                                                 | 31 -0.19 (-0.29 to -0.085)                                                                                                                          | 32 -0.02 (-0.03 to -0.01)                                                                                                                                             |

33 Analyses, adjusted for the same factors as in main model presented in the manuscript, including a  
34 quadratic and/or cubic term, or restricted cubic splines, to represent the number of ZIP-level resources  
35 resulted in worse model fit by Akaike information criterion and Bayes information criterion, suggesting  
36 that a linear approximation of the relationship between ZIP-level resources and the modeled outcome is  
37 reasonable.  
38

39 eTable 6: Model fit statistics from different specifications of ZIP-level food resources

| 40                              | 41 Akaike information criterion<br>42 (smaller represents better fit) | 43 Bayes information criterion<br>44 (smaller represents better fit) |
|---------------------------------|-----------------------------------------------------------------------|----------------------------------------------------------------------|
| 45 Linear term only             | 46 468646.6                                                           | 47 468640.6                                                          |
| 48 Linear plus quadratic        | 49 468656.5                                                           | 50 468650.5                                                          |
| 51 Linear, quadratic, and cubic | 52 468667.8                                                           | 53 468661.8                                                          |
| 54 Restricted cubic spline      | 55 468656.0                                                           | 56 468650.0                                                          |

57 Analyses, adjusted for the same factors as in main model presented in the manuscript, restricted to  
58 those with indicators of lower socioeconomic status show that the estimates for the association  
59 between additional ZIP-level food resources and BMI are slightly larger than in the overall population,  
60 which is consistent with the idea that these resources are beneficial for those with lower socioeconomic  
61 status

62 eTable 7: Analyses of association between ZIP-level food resources and body mass index, restricted to  
63 those with indicators of lower socioeconomic status  
64

| Estimated difference in BMI associated with 1 additional ZIP-level resource (95% CI), kg/m <sup>2</sup> (main model from manuscript) | Estimated difference in BMI associated with 1 additional ZIP-level resource (95% CI), restricted to those with high school diploma or lower educational attainment, kg/m <sup>2</sup> | Estimated difference in BMI associated with 1 additional ZIP-level resource (95% CI), restricted to those living in ZIP with > 15% living in poverty, kg/m <sup>2</sup> |
|--------------------------------------------------------------------------------------------------------------------------------------|---------------------------------------------------------------------------------------------------------------------------------------------------------------------------------------|-------------------------------------------------------------------------------------------------------------------------------------------------------------------------|
| -0.08 (-0.13 to -0.03)                                                                                                               | -0.09 (-0.15 to -0.04)                                                                                                                                                                | -0.11 (-0.17 to -0.06)                                                                                                                                                  |

For peer review only



eTable 8: Full models for association between ZIP-level food resources and body mass index

|                                   | Estimate  | Standard Error | p-value | Lower 95% Confidence Interval | Upper 95% Confidence Interval |
|-----------------------------------|-----------|----------------|---------|-------------------------------|-------------------------------|
| Intercept                         | 28.2196   | 1.1796         | <.0001  | 25.9071                       | 30.5320                       |
| ZIP-level food resources          | -0.08429  | 0.02512        | 0.0010  | -0.1340                       | -0.03460                      |
| ZIP-level afterschool resources   | 0.009484  | 0.02203        | 0.6674  | -0.03404                      | 0.05301                       |
| Age, years                        | -0.04950  | 0.002011       | <.0001  | -0.05344                      | -0.04556                      |
| Female                            | -1.3794   | 0.04395        | <.0001  | -1.4656                       | -1.2933                       |
| Race/ethnicity                    |           |                |         |                               |                               |
| Asian/Multi/Other                 | -2.5117   | 0.09328        | <.0001  | -2.6945                       | -2.3288                       |
| Non-Hispanic Black                | 0.9600    | 0.09753        | <.0001  | 0.7688                        | 1.1511                        |
| Hispanic                          | 0.7277    | 0.1081         | <.0001  | 0.5157                        | 0.9396                        |
| Non-Hispanic White                | reference | n/a            | n/a     | n/a                           | n/a                           |
| Education                         |           |                |         |                               |                               |
| College or >                      | -0.2793   | 0.07082        | <.0001  | -0.4181                       | -0.1404                       |
| High School Diploma               | 0.09622   | 0.07549        | 0.2025  | -0.05175                      | 0.2442                        |
| Less than High School Diploma     | 0.3871    | 0.09117        | <.0001  | 0.2084                        | 0.5658                        |
| Unknown/Declined                  | reference | n/a            | n/a     | n/a                           | n/a                           |
| Insurance                         |           |                |         |                               |                               |
| Private                           | 0.1890    | 1.0208         | 0.8531  | -1.8118                       | 2.1898                        |
| Medicare and Medicaid             | 0.06964   | 1.0240         | 0.9458  | -1.9374                       | 2.0767                        |
| Medicaid                          | 0.6961    | 1.0215         | 0.4956  | -1.3061                       | 2.6983                        |
| Medicaid                          | -0.4968   | 1.0230         | 0.6272  | -2.5019                       | 1.5083                        |
| Self-pay                          | reference | n/a            | n/a     | n/a                           | n/a                           |
| English is Primary Language       | 0.7128    | 0.09604        | <.0001  | 0.5246                        | 0.9011                        |
| History of Hypertension           | 2.7291    | 0.05550        | <.0001  | 2.6203                        | 2.8379                        |
| History of Coronary Heart Disease | -0.4141   | 0.08601        | <.0001  | -0.5827                       | -0.2455                       |
| History of Diabetes Mellitus      | 2.4217    | 0.07471        | <.0001  | 2.2752                        | 2.5681                        |

eTable 8: Full models for association between ZIP-level food resources and body mass index

|                                             | Estimate  | Standard Error | p-value | Lower 95% Confidence Interval | Upper 95% Confidence Interval |
|---------------------------------------------|-----------|----------------|---------|-------------------------------|-------------------------------|
| History of Depression                       | 0.5488    | 0.07350        | <.0001  | 0.4048                        | 0.6929                        |
| History of Osteoarthritis                   | 1.3188    | 0.05467        | <.0001  | 1.2116                        | 1.4260                        |
| Charlson Comorbidity Score                  | 0.06713   | 0.01268        | <.0001  | 0.04227                       | 0.09198                       |
| Clinic Visits                               | -0.00068  | 0.004383       | 0.8770  | -0.00927                      | 0.007911                      |
| Clinic Connectedness                        |           |                |         |                               |                               |
| Connected to specific physician             | 0.3184    | 0.05024        | <.0001  | 0.2200                        | 0.4169                        |
| Connected to specific practice              | reference | n/a            | n/a     | n/a                           | n/a                           |
| Lives in Urban Area                         | 0.2640    | 0.1580         | 0.0949  | -0.04583                      | 0.5739                        |
| Lives in Area with Low Physical Food Access | 0.09426   | 0.07794        | 0.2265  | -0.05851                      | 0.2470                        |
| Percentage of Area Living in Group Quarters | -0.00020  | 0.000060       | 0.0009  | -0.00032                      | -0.00008                      |
| Lives in Area with Low Vehicle Access       | 0.1189    | 0.05577        | 0.0331  | 0.009564                      | 0.2282                        |
| ZIP-level Unemployment Rate                 | 0.2608    | 0.03829        | <.0001  | 0.1855                        | 0.3361                        |
| ZIP-level Median Household Income           | -0.00001  | 1.936E-6       | <.0001  | -0.00002                      | -8.81E-6                      |
| ZIP-level Poverty Rate                      | -0.03254  | 0.01370        | 0.0183  | -0.05952                      | -0.00555                      |
| ZIP-level Segregation                       | 0.002536  | 0.003897       | 0.5158  | -0.00514                      | 0.01021                       |

eTable 9: Full models for association between ZIP-level employment resources and body mass index

|                                | Estimate | Standard Error | p-value | Lower 95% Confidence Interval | Upper 95% Confidence Interval |
|--------------------------------|----------|----------------|---------|-------------------------------|-------------------------------|
| Intercept                      | 28.1779  | 1.1847         | <.0001  | 25.8554                       | 30.5004                       |
| ZIP-level employment resources | -0.05415 | 0.02624        | 0.0407  | -0.1060                       | -0.00231                      |

eTable 9: Full models for association between ZIP-level employment resources and body mass index

|                                   | Estimate  | Standard Error | p-value | Lower 95% Confidence Interval | Upper 95% Confidence Interval |
|-----------------------------------|-----------|----------------|---------|-------------------------------|-------------------------------|
| ZIP-level afterschool resources   | 0.01083   | 0.03215        | 0.7366  | -0.05269                      | 0.07436                       |
| Age, years                        | -0.04951  | 0.002011       | <.0001  | -0.05345                      | -0.04557                      |
| Female                            | -1.3795   | 0.04395        | <.0001  | -1.4656                       | -1.2933                       |
| Race/ethnicity                    |           |                |         |                               |                               |
| Asian/Multi/Other                 | -2.5089   | 0.09330        | <.0001  | -2.6918                       | -2.3260                       |
| Non-Hispanic Black                | 0.9669    | 0.09755        | <.0001  | 0.7757                        | 1.1581                        |
| Hispanic                          | 0.7300    | 0.1081         | <.0001  | 0.5181                        | 0.9420                        |
| Non-Hispanic White                | reference | n/a            | n/a     | n/a                           | n/a                           |
| Education                         |           |                |         |                               |                               |
| College or >                      | -0.2787   | 0.07083        | <.0001  | -0.4175                       | -0.1399                       |
| High School Diploma               | 0.09646   | 0.07549        | 0.2013  | -0.05150                      | 0.2444                        |
| Less than High School Diploma     | 0.3880    | 0.09117        | <.0001  | 0.2093                        | 0.5667                        |
| Unknown/Declined                  | reference | n/a            | n/a     | n/a                           | n/a                           |
| Insurance                         |           |                |         |                               |                               |
| Private                           | 0.1930    | 1.0208         | 0.8500  | -1.8078                       | 2.1938                        |
| Medicare and Medicaid             | 0.07527   | 1.0240         | 0.9414  | -1.9318                       | 2.0823                        |
| Medicaid                          | 0.7010    | 1.0215         | 0.4926  | -1.3012                       | 2.7032                        |
| Medicaid                          | -0.4922   | 1.0230         | 0.6304  | -2.4973                       | 1.5128                        |
| Self-pay                          | reference | n/a            | n/a     | n/a                           | n/a                           |
| English is Primary Language       | 0.7126    | 0.09604        | <.0001  | 0.5243                        | 0.9008                        |
| History of Hypertension           | 2.7296    | 0.05550        | <.0001  | 2.6208                        | 2.8383                        |
| History of Coronary Heart Disease | -0.4138   | 0.08601        | <.0001  | -0.5824                       | -0.2452                       |
| History of Diabetes Mellitus      | 2.4215    | 0.07471        | <.0001  | 2.2751                        | 2.5680                        |
| History of Depression             | 0.5493    | 0.07350        | <.0001  | 0.4052                        | 0.6933                        |
| History of Osteoarthritis         | 1.3190    | 0.05467        | <.0001  | 1.2118                        | 1.4261                        |

eTable 9: Full models for association between ZIP-level employment resources and body mass index

|                                             | Estimate  | Standard Error | p-value | Lower 95% Confidence Interval | Upper 95% Confidence Interval |
|---------------------------------------------|-----------|----------------|---------|-------------------------------|-------------------------------|
| Charlson Comorbidity Score                  | 0.06713   | 0.01268        | <.0001  | 0.04227                       | 0.09198                       |
| Clinic Visits                               | -0.00069  | 0.004383       | 0.8744  | -0.00928                      | 0.007897                      |
| Clinic Connectedness                        |           |                |         |                               |                               |
| Connected to specific physician             | 0.3181    | 0.05024        | <.0001  | 0.2197                        | 0.4166                        |
| Connected to specific practice              | reference | n/a            | n/a     | n/a                           | n/a                           |
| Lives in Urban Area                         | 0.2569    | 0.1589         | 0.1059  | -0.05456                      | 0.5684                        |
| Lives in Area with Low Physical Food Access | 0.09945   | 0.07799        | 0.2023  | -0.05342                      | 0.2523                        |
| Percentage of Area Living in Group Quarters | -0.00019  | 0.000060       | 0.0013  | -0.00031                      | -0.00008                      |
| Lives in Area with Low Vehicle Access       | 0.1198    | 0.05586        | 0.0320  | 0.01027                       | 0.2293                        |
| ZIP-level Unemployment Rate                 | 0.2601    | 0.03946        | <.0001  | 0.1825                        | 0.3377                        |
| ZIP-level Median Household Income           | -0.00001  | 1.988E-6       | <.0001  | -0.00002                      | -8.84E-6                      |
| ZIP-level Poverty Rate                      | -0.03147  | 0.01401        | 0.0255  | -0.05905                      | -0.00389                      |
| ZIP-level Segregation                       | 0.003079  | 0.003968       | 0.4385  | -0.00473                      | 0.01089                       |

eTable 10: Full models for association between ZIP-level nutrition resources and body mass index

|                                   | Estimate  | Standard Error | p-value | Lower 95% Confidence Interval | Upper 95% Confidence Interval |
|-----------------------------------|-----------|----------------|---------|-------------------------------|-------------------------------|
| Intercept                         | 28.1161   | 1.1836         | <.0001  | 25.7958                       | 30.4364                       |
| ZIP-level nutrition resources     | -0.07146  | 0.03122        | 0.0234  | -0.1331                       | -0.00980                      |
| ZIP-level afterschool resources   | 0.002639  | 0.02650        | 0.9208  | -0.04967                      | 0.05495                       |
| Age, years                        | -0.04949  | 0.002011       | <.0001  | -0.05344                      | -0.04555                      |
| Female                            | -1.3792   | 0.04395        | <.0001  | -1.4654                       | -1.2931                       |
| Race/ethnicity                    |           |                |         |                               |                               |
| Asian/Multi/Other                 | -2.5116   | 0.09329        | <.0001  | -2.6944                       | -2.3287                       |
| Non-Hispanic Black                | 0.9650    | 0.09756        | <.0001  | 0.7738                        | 1.1562                        |
| Hispanic                          | 0.7272    | 0.1081         | <.0001  | 0.5152                        | 0.9392                        |
| Non-Hispanic White                | reference | n/a            | n/a     | n/a                           | n/a                           |
| Education                         |           |                |         |                               |                               |
| College or >                      | -0.2787   | 0.07082        | <.0001  | -0.4175                       | -0.1399                       |
| High School Diploma               | 0.09695   | 0.07549        | 0.1991  | -0.05102                      | 0.2449                        |
| Less than High School Diploma     | 0.3870    | 0.09117        | <.0001  | 0.2083                        | 0.5657                        |
| Unknown/Declined                  | reference | n/a            | n/a     | n/a                           | n/a                           |
| Insurance                         |           |                |         |                               |                               |
| Private                           | 0.1858    | 1.0208         | 0.8555  | -1.8150                       | 2.1866                        |
| Medicare and Medicaid             | 0.06642   | 1.0240         | 0.9483  | -1.9406                       | 2.0735                        |
| Medicaid                          | 0.6927    | 1.0215         | 0.4977  | -1.3095                       | 2.6948                        |
| Medicaid                          | -0.5000   | 1.0230         | 0.6250  | -2.5050                       | 1.5051                        |
| Self-pay                          | reference | n/a            | n/a     | n/a                           | n/a.                          |
| English is Primary Language       | 0.7143    | 0.09604        | <.0001  | 0.5261                        | 0.9026                        |
| History of Hypertension           | 2.7290    | 0.05550        | <.0001  | 2.6202                        | 2.8378                        |
| History of Coronary Heart Disease | -0.4139   | 0.08601        | <.0001  | -0.5825                       | -0.2453                       |
| History of Diabetes Mellitus      | 2.4211    | 0.07471        | <.0001  | 2.2747                        | 2.5676                        |

eTable 10: Full models for association between ZIP-level nutrition resources and body mass index

|                                             | Estimate  | Standard Error | p-value | Lower 95% Confidence Interval | Upper 95% Confidence Interval |
|---------------------------------------------|-----------|----------------|---------|-------------------------------|-------------------------------|
| History of Depression                       | 0.5484    | 0.07350        | <.0001  | 0.4044                        | 0.6925                        |
| History of Osteoarthritis                   | 1.3187    | 0.05467        | <.0001  | 1.2115                        | 1.4259                        |
| Charlson Comorbidity Score                  | 0.06712   | 0.01268        | <.0001  | 0.04227                       | 0.09197                       |
| Clinic Visits                               | -0.00069  | 0.004383       | 0.8750  | -0.00928                      | 0.007900                      |
| Clinic Connectedness                        |           |                |         |                               |                               |
| Connected to specific physician             | 0.3185    | 0.05024        | <.0001  | 0.2200                        | 0.4170                        |
| Connected to specific practice              | reference | n/a            | n/a     | n/a                           | n/a.                          |
| Lives in Urban Area                         | 0.2529    | 0.1588         | 0.1113  | -0.05838                      | 0.5642                        |
| Lives in Area with Low Physical Food Access | 0.1009    | 0.07792        | 0.1955  | -0.05185                      | 0.2536                        |
| Percentage of Area Living in Group Quarters | -0.00020  | 0.000060       | 0.0009  | -0.00032                      | -0.00008                      |
| Lives in Area with Low Vehicle Access       | 0.1176    | 0.05585        | 0.0352  | 0.008130                      | 0.2271                        |
| ZIP-level Unemployment Rate                 | 0.2684    | 0.03881        | <.0001  | 0.1921                        | 0.3447                        |
| ZIP-level Median Household Income           | -0.00001  | 1.972E-6       | <.0001  | -0.00002                      | -8.48E-6                      |
| ZIP-level Poverty Rate                      | -0.03270  | 0.01396        | 0.0199  | -0.06020                      | -0.00521                      |
| ZIP-level Segregation                       | 0.003113  | 0.003967       | 0.4332  | -0.00470                      | 0.01092                       |

eTable 11: Full models for association between ZIP-level housing resources and systolic blood pressure

|                                   | Estimate  | Standard Error | p-value | Lower 95% Confidence Interval | Upper 95% Confidence Interval |
|-----------------------------------|-----------|----------------|---------|-------------------------------|-------------------------------|
| Intercept                         | 115.70    | 11.1188        | <.0001  | 93.9116                       | 137.50                        |
| ZIP-level housing resources       | -0.04612  | 0.05585        | 0.4106  | -0.1567                       | 0.06446                       |
| ZIP-level afterschool resources   | -0.03286  | 0.04586        | 0.4755  | -0.1240                       | 0.05828                       |
| Age, years                        | 0.1521    | 0.009429       | <.0001  | 0.1337                        | 0.1706                        |
| Female                            | -0.6839   | 0.1930         | 0.0004  | -1.0622                       | -0.3055                       |
| Race/ethnicity                    |           |                |         |                               |                               |
| Asian/Multi/Other                 | -1.2014   | 0.4952         | 0.0153  | -2.1720                       | -0.2308                       |
| Non-Hispanic Black                | 2.8013    | 0.3960         | <.0001  | 2.0251                        | 3.5774                        |
| Hispanic                          | 0.5064    | 0.5619         | 0.3675  | -0.5950                       | 1.6078                        |
| Non-Hispanic White                | reference | n/a            | n/a     | n/a                           | n/a.                          |
| Education                         |           |                |         |                               |                               |
| College or >                      | 0.02428   | 0.3181         | 0.9392  | -0.5992                       | 0.6478                        |
| High School Diploma               | 0.1732    | 0.3236         | 0.5924  | -0.4610                       | 0.8074                        |
| Less than High School Diploma     | 0.6220    | 0.3914         | 0.1121  | -0.1452                       | 1.3893                        |
| Unknown/Declined                  | reference | n/a            | n/a     | n/a                           | n/a.                          |
| Insurance                         |           |                |         |                               |                               |
| Private                           | 8.3527    | 10.9765        | 0.4467  | -13.1616                      | 29.8671                       |
| Medicare and Medicaid             | 7.8728    | 10.9784        | 0.4733  | -13.6453                      | 29.3910                       |
| Medicaid                          | 8.5660    | 10.9772        | 0.4352  | -12.9499                      | 30.0818                       |
| Medicaid                          | 8.4728    | 10.9781        | 0.4402  | -13.0447                      | 29.9903                       |
| Self-pay                          | reference | n/a            | n/a     | n/a                           | n/a.                          |
| English is Primary Language       | -0.01463  | 0.4091         | 0.9715  | -0.8165                       | 0.7873                        |
| History of Coronary Heart Disease | -2.7190   | 0.2620         | <.0001  | -3.2325                       | -2.2055                       |
| History of Diabetes Mellitus      | 0.1079    | 0.2325         | 0.6426  | -0.3478                       | 0.5635                        |
| History of Depression             | -0.9568   | 0.3076         | 0.0019  | -1.5596                       | -0.3539                       |

eTable 11: Full models for association between ZIP-level housing resources and systolic blood pressure

|                                             | Estimate  | Standard Error | p-value | Lower 95% Confidence Interval | Upper 95% Confidence Interval |
|---------------------------------------------|-----------|----------------|---------|-------------------------------|-------------------------------|
| History of Osteoarthritis                   | -0.5000   | 0.2009         | 0.0128  | -0.8939                       | -0.1062                       |
| Charlson Comorbidity Score                  | -0.05959  | 0.04502        | 0.1856  | -0.1478                       | 0.02865                       |
| Clinic Visits                               | -0.02840  | 0.01601        | 0.0760  | -0.05978                      | 0.002975                      |
| Clinic Connectedness                        |           |                |         |                               |                               |
| Connected to specific physician             | -1.9594   | 0.2580         | <.0001  | -2.4651                       | -1.4538                       |
| Connected to specific practice              | reference | n/a            | n/a     | n/a                           | n/a.                          |
| Lives in Urban Area                         | 0.2234    | 0.5896         | 0.7049  | -0.9332                       | 1.3799                        |
| Lives in Area with Low Physical Food Access | -0.6380   | 0.3321         | 0.0548  | -1.2892                       | 0.01327                       |
| Percentage of Area Living in Group Quarters | -0.00025  | 0.000262       | 0.3352  | -0.00077                      | 0.000261                      |
| Lives in Area with Low Vehicle Access       | 0.2689    | 0.2251         | 0.2324  | -0.1725                       | 0.7102                        |
| ZIP-level Unemployment Rate                 | 0.1919    | 0.1055         | 0.0702  | -0.01598                      | 0.3998                        |
| ZIP-level Median Household Income           | 5.33E-7   | 4.993E-6       | 0.9151  | -9.33E-6                      | 0.000010                      |
| ZIP-level Poverty Rate                      | 0.003603  | 0.03442        | 0.9168  | -0.06460                      | 0.07180                       |
| ZIP-level Segregation                       | -0.00127  | 0.01007        | 0.8999  | -0.02117                      | 0.01863                       |



eTable 12: Full models for association between ZIP-level nutrition resources and systolic blood pressure

|                                   | Estimate  | Standard Error | p-value | Lower 95% Confidence Interval | Upper 95% Confidence Interval |
|-----------------------------------|-----------|----------------|---------|-------------------------------|-------------------------------|
| Intercept                         | 115.52    | 11.1170        | <.0001  | 93.7336                       | 137.31                        |
| ZIP-level nutrition resources     | 0.01167   | 0.07270        | 0.8728  | -0.1325                       | 0.1559                        |
| ZIP-level afterschool resources   | -0.06660  | 0.05852        | 0.2582  | -0.1829                       | 0.04971                       |
| Age, years                        | 0.1522    | 0.009429       | <.0001  | 0.1337                        | 0.1707                        |
| Female                            | -0.6823   | 0.1930         | 0.0004  | -1.0606                       | -0.3039                       |
| Race/ethnicity                    |           |                |         |                               |                               |
| Asian/Multi/Other                 | -1.2077   | 0.4952         | 0.0147  | -2.1782                       | -0.2371                       |
| Non-Hispanic Black                | 2.7981    | 0.3960         | <.0001  | 2.0218                        | 3.5744                        |
| Hispanic                          | 0.5101    | 0.5622         | 0.3643  | -0.5919                       | 1.6120                        |
| Non-Hispanic White                | reference | n/a            | n/a     | n/a                           | n/a.                          |
| education                         |           |                |         |                               |                               |
| College or >                      | 0.01868   | 0.3181         | 0.9532  | -0.6048                       | 0.6421                        |
| High School Diploma               | 0.1716    | 0.3236         | 0.5958  | -0.4626                       | 0.8059                        |
| Less than High School Diploma     | 0.6218    | 0.3915         | 0.1122  | -0.1455                       | 1.3891                        |
| Unknown/Declined                  | reference | n/a            | n/a     | n/a                           | n/a.                          |
| Insurance                         |           |                |         |                               |                               |
| Private                           | 8.3894    | 10.9765        | 0.4447  | -13.1251                      | 29.9038                       |
| Medicare and Medicaid             | 7.9053    | 10.9784        | 0.4715  | -13.6130                      | 29.4235                       |
| Medicaid                          | 8.6004    | 10.9773        | 0.4334  | -12.9155                      | 30.1163                       |
| Medicaid                          | 8.5087    | 10.9781        | 0.4383  | -13.0089                      | 30.0263                       |
| Self-pay                          | reference | n/a            | n/a     | n/a                           | n/a.                          |
| English is Primary Language       | -0.01592  | 0.4094         | 0.9690  | -0.8183                       | 0.7865                        |
| History of Coronary Heart Disease | -2.7161   | 0.2620         | <.0001  | -3.2295                       | -2.2026                       |
| History of Diabetes Mellitus      | 0.1087    | 0.2325         | 0.6399  | -0.3469                       | 0.5644                        |
| History of Depression             | -0.9576   | 0.3076         | 0.0019  | -1.5605                       | -0.3547                       |

eTable 12: Full models for association between ZIP-level nutrition resources and systolic blood pressure

|                                             | Estimate  | Standard Error | p-value | Lower 95% Confidence Interval | Upper 95% Confidence Interval |
|---------------------------------------------|-----------|----------------|---------|-------------------------------|-------------------------------|
| History of Osteoarthritis                   | -0.5002   | 0.2009         | 0.0128  | -0.8940                       | -0.1063                       |
| Charlson Comorbidity Score                  | -0.05975  | 0.04502        | 0.1845  | -0.1480                       | 0.02849                       |
| Clinic Visits                               | -0.02845  | 0.01601        | 0.0756  | -0.05982                      | 0.002932                      |
| Clinic Connectedness                        |           |                |         |                               |                               |
| Connected to specific physician             | -1.9589   | 0.2580         | <.0001  | -2.4645                       | -1.4532                       |
| Connected to specific practice              | reference | n/a            | n/a     | n/a                           | n/a.                          |
| Lives in Urban Area                         | 0.1603    | 0.5860         | 0.7845  | -0.9893                       | 1.3098                        |
| Lives in Area with Low Physical Food Access | -0.5789   | 0.3269         | 0.0768  | -1.2201                       | 0.06231                       |
| Percentage of Area Living in Group Quarters | -0.00025  | 0.000262       | 0.3343  | -0.00077                      | 0.000261                      |
| Lives in Area with Low Vehicle Access       | 0.2662    | 0.2251         | 0.2371  | -0.1752                       | 0.7076                        |
| ZIP-level Unemployment Rate                 | 0.2065    | 0.1045         | 0.0493  | 0.000612                      | 0.4124                        |
| ZIP-level Median Household Income           | 1.008E-6  | 4.966E-6       | 0.8395  | -8.8E-6                       | 0.000011                      |
| ZIP-level Poverty Rate                      | 0.003660  | 0.03453        | 0.9158  | -0.06473                      | 0.07205                       |
| ZIP-level Segregation                       | -0.00086  | 0.01007        | 0.9325  | -0.02075                      | 0.01904                       |

eTable 13: Full models for association between ZIP-level nutrition resources and low density lipoprotein cholesterol

|                                   | Estimate  | Standard Error | p-value | Lower 95% Confidence Interval | Upper 95% Confidence Interval |
|-----------------------------------|-----------|----------------|---------|-------------------------------|-------------------------------|
| Intercept                         | 103.76    | 38.1863        | 0.0066  | 28.9153                       | 178.61                        |
| ZIP-level nutrition resources     | 0.09859   | 0.2309         | 0.6699  | -0.3573                       | 0.5545                        |
| ZIP-level afterschool resources   | -0.00381  | 0.1854         | 0.9837  | -0.3706                       | 0.3630                        |
| Age, years                        | -0.3600   | 0.03023        | <.0001  | -0.4193                       | -0.3008                       |
| Female                            | 11.7432   | 0.5645         | <.0001  | 10.6367                       | 12.8497                       |
| Race/ethnicity                    | 0         | .              | .       | .                             | .                             |
| Asian/Multi/Other                 | -2.6927   | 1.4423         | 0.0619  | -5.5197                       | 0.1343                        |
| Non-Hispanic Black                | 0.7350    | 1.2077         | 0.5428  | -1.6323                       | 3.1022                        |
| Hispanic                          | 0.3468    | 1.7794         | 0.8455  | -3.1409                       | 3.8345                        |
| Non-Hispanic White                | reference | n/a            | n/a     | n/a                           | n/a.                          |
| Education                         |           |                |         |                               |                               |
| College or >                      | -0.1046   | 0.9328         | 0.9107  | -1.9329                       | 1.7237                        |
| High School Diploma               | -0.2598   | 0.9497         | 0.7844  | -2.1212                       | 1.6016                        |
| Less than High School Diploma     | -0.8496   | 1.1612         | 0.4644  | -3.1256                       | 1.4264                        |
| Unknown/Declined                  | reference | n/a            | n/a     | n/a                           | n/a.                          |
| Insurance                         |           |                |         |                               |                               |
| Private                           | 37.5148   | 37.8147        | 0.3212  | -36.6052                      | 111.63                        |
| Medicare and Medicaid             | 36.1970   | 37.8181        | 0.3385  | -37.9296                      | 110.32                        |
| Medicaid                          | 37.4872   | 37.8163        | 0.3216  | -36.6360                      | 111.61                        |
| Medicaid                          | 35.4040   | 37.8171        | 0.3492  | -38.7206                      | 109.53                        |
| Self-pay                          | reference | n/a            | n/a     | n/a                           | n/a.                          |
| English is Primary Language       | 0.6482    | 1.2438         | 0.6023  | -1.7897                       | 3.0861                        |
| History of Hypertension           | -4.3457   | 1.1538         | 0.0002  | -6.6072                       | -2.0842                       |
| History of Coronary Heart Disease | -14.8429  | 0.7275         | <.0001  | -16.2689                      | -13.4170                      |
| History of Diabetes Mellitus      | -16.1429  | 0.6619         | <.0001  | -17.4404                      | -14.8455                      |

eTable 13: Full models for association between ZIP-level nutrition resources and low density lipoprotein cholesterol

|                                             | Estimate  | Standard Error | p-value | Lower 95% Confidence Interval | Upper 95% Confidence Interval |
|---------------------------------------------|-----------|----------------|---------|-------------------------------|-------------------------------|
| History of Depression                       | 1.0979    | 0.9513         | 0.2485  | -0.7668                       | 2.9626                        |
| History of Osteoarthritis                   | 1.0828    | 0.5853         | 0.0643  | -0.06449                      | 2.2302                        |
| Charlson Comorbidity Score                  | -0.9716   | 0.1366         | <.0001  | -1.2394                       | -0.7038                       |
| Clinic Visits                               | -0.1983   | 0.04901        | <.0001  | -0.2944                       | -0.1023                       |
| Clinic Connectedness                        |           |                |         |                               |                               |
| Connected to specific physician             | -1.4526   | 0.8446         | 0.0855  | -3.1081                       | 0.2029                        |
| Connected to specific practice              | reference | n/a            | n/a     | n/a                           | n/a.                          |
| Lives in Urban Area                         | -0.4909   | 1.7202         | 0.7754  | -3.8649                       | 2.8831                        |
| Lives in Area with Low Physical Food Access | 0.2234    | 1.0117         | 0.8252  | -1.7604                       | 2.2073                        |
| Percentage of Area Living in Group Quarters | 0.001870  | 0.000788       | 0.0177  | 0.000325                      | 0.003414                      |
| Lives in Area with Low Vehicle Access       | -1.1732   | 0.6607         | 0.0759  | -2.4686                       | 0.1222                        |
| ZIP-level Unemployment Rate                 | 0.1519    | 0.3138         | 0.6287  | -0.4659                       | 0.7698                        |
| ZIP-level Median Household Income           | -0.00001  | 0.000015       | 0.3460  | -0.00004                      | 0.000015                      |
| ZIP-level Poverty Rate                      | -0.06528  | 0.1068         | 0.5418  | -0.2760                       | 0.1454                        |
| ZIP-level Segregation                       | -0.00654  | 0.03045        | 0.8301  | -0.06656                      | 0.05347                       |

eTable 14: Full models for association between ZIP-level substance abuse resources and hemoglobin A1c

|                                     | Estimate  | Standard Error | p-value | Lower 95% Confidence Interval | Upper 95% Confidence Interval |
|-------------------------------------|-----------|----------------|---------|-------------------------------|-------------------------------|
| Intercept                           | 7.0576    | 0.3362         | <.0001  | 6.3986                        | 7.7166                        |
| ZIP-level substance abuse resources | -0.00251  | 0.01460        | 0.8634  | -0.03113                      | 0.02611                       |
| ZIP-level afterschool resources     | 0.01106   | 0.007376       | 0.1336  | -0.00339                      | 0.02552                       |
| Age, years                          | -0.01059  | 0.001940       | <.0001  | -0.01440                      | -0.00679                      |
| Female                              | -0.1380   | 0.03843        | 0.0003  | -0.2133                       | -0.06263                      |
| Race/ethnicity                      |           |                |         |                               |                               |
| Asian/Multi/Other                   | -0.08503  | 0.08123        | 0.2952  | -0.2443                       | 0.07420                       |
| Non-Hispanic Black                  | 0.07012   | 0.06209        | 0.2588  | -0.05160                      | 0.1918                        |
| Hispanic                            | 0.06593   | 0.08944        | 0.4611  | -0.1094                       | 0.2413                        |
| Non-Hispanic White                  | reference | n/a            | n/a     | n/a                           | n/a.                          |
| Education                           |           |                |         |                               |                               |
| College or >                        | -0.1646   | 0.06820        | 0.0158  | -0.2983                       | -0.03090                      |
| High School Diploma                 | -0.01912  | 0.06665        | 0.7742  | -0.1498                       | 0.1116                        |
| Less than High School Diploma       | -0.07235  | 0.07528        | 0.3366  | -0.2200                       | 0.07529                       |
| Unknown/Declined                    | reference | n/a            | n/a     | n/a                           | n/a.                          |
| Insurance                           |           |                |         |                               |                               |
| Private                             | 0.2134    | 0.05612        | 0.0001  | 0.1034                        | 0.3234                        |
| Medicare and Medicaid               | 0.03459   | 0.05765        | 0.5486  | -0.07842                      | 0.1476                        |
| Medicaid                            | 0.3912    | 0.06811        | <.0001  | 0.2577                        | 0.5247                        |
| Medicaid                            | reference | n/a            | n/a     | n/a                           | n/a.                          |
| English is Primary Language         | -0.1599   | 0.06505        | 0.0140  | -0.2874                       | -0.03232                      |
| History of Hypertension             | 0.2365    | 0.05985        | <.0001  | 0.1191                        | 0.3538                        |
| History of Coronary Heart Disease   | -0.03921  | 0.04940        | 0.4274  | -0.1361                       | 0.05764                       |

eTable 14: Full models for association between ZIP-level substance abuse resources and hemoglobin A1c

|                                             | Estimate  | Standard Error     | p-value            | Lower 95% Confidence Interval | Upper 95% Confidence Interval |
|---------------------------------------------|-----------|--------------------|--------------------|-------------------------------|-------------------------------|
| History of Depression                       | -0.03705  | 0.05766            | 0.5205             | -0.1501                       | 0.07598                       |
| History of Osteoarthritis                   | -0.1499   | 0.04010            | 0.0002             | -0.2285                       | -0.07134                      |
| Charlson Comorbidity Score                  | 0.01588   | 0.008146           | 0.0513             | -0.00009                      | 0.03185                       |
| Clinic Visits                               | 0.006502  | 0.002846           | 0.0224             | 0.000922                      | 0.01208                       |
| Clinic Connectedness                        |           |                    |                    |                               |                               |
| Connected to specific physician             | -0.08553  | 0.05430            | 0.1153             | -0.1920                       | 0.02092                       |
| Connected to specific practice              | reference | n/a                | n/a                | n/a                           | n/a.                          |
| Lives in Urban Area                         | 0.3470    | 0.1270             | 0.0063             | 0.09804                       | 0.5959                        |
| Lives in Area with Low Physical Food Access | -0.07748  | 0.06097            | 0.2039             | -0.1970                       | 0.04205                       |
| Percentage of Area Living in Group Quarters | -0.00001  | 0.000060           | 0.8418             | -0.00013                      | 0.000106                      |
| Lives in Area with Low Vehicle Access       | 0.04455   | 0.04429            | 0.3145             | -0.04228                      | 0.1314                        |
| ZIP-level Unemployment Rate                 | 0.03710   | 0.01932            | 0.0549             | -0.00078                      | 0.07499                       |
| ZIP-level Median Household Income           | 1.636E-6  | Unable to estimate | Unable to estimate | Unable to estimate            | Unable to estimate            |
| ZIP-level Poverty Rate                      | -0.00359  | 0.005890           | 0.5418             | -0.01514                      | 0.007953                      |
| ZIP-level Segregation                       | -0.00001  | 0.001802           | 0.9950             | -0.00354                      | 0.003522                      |

eTable 15: Full models for association between ZIP-level mental health resources and hemoglobin A1c

|                                   | Estimate  | Standard Error | p-value | Lower 95% Confidence Interval | Upper 95% Confidence Interval |
|-----------------------------------|-----------|----------------|---------|-------------------------------|-------------------------------|
| Intercept                         | 7.0641    | 0.3371         | <.0001  | 6.4033                        | 7.7250                        |
| ZIP-level mental health resources | -0.00348  | 0.01130        | 0.7582  | -0.02564                      | 0.01868                       |
| ZIP-level afterschool resources   | 0.01159   | 0.006992       | 0.0974  | -0.00212                      | 0.02530                       |
| Age, years                        | -0.01058  | 0.001940       | <.0001  | -0.01438                      | -0.00678                      |
| Female                            | -0.1382   | 0.03843        | 0.0003  | -0.2135                       | -0.06283                      |
| Race/ethnicity                    |           |                |         |                               |                               |
| Asian/Multi/Other                 | -0.08415  | 0.08130        | 0.3007  | -0.2435                       | 0.07522                       |
| Non-Hispanic Black                | 0.07084   | 0.06217        | 0.2545  | -0.05103                      | 0.1927                        |
| Hispanic                          | 0.06543   | 0.08946        | 0.4646  | -0.1099                       | 0.2408                        |
| Non-Hispanic White                | reference | n/a            | n/a     | n/a                           | n/a.                          |
| Education                         |           |                |         |                               |                               |
| College or >                      | -0.1647   | 0.06820        | 0.0158  | -0.2984                       | -0.03095                      |
| High School Diploma               | -0.01936  | 0.06665        | 0.7715  | -0.1500                       | 0.1113                        |
| Less than High School Diploma     | -0.07325  | 0.07536        | 0.3312  | -0.2210                       | 0.07454                       |
| Unknown/Declined                  | reference | n/a            | n/a     | n/a                           | n/a.                          |
| Insurance                         |           |                |         |                               |                               |
| Private                           | 0.2135    | 0.05612        | 0.0001  | 0.1035                        | 0.3235                        |
| Medicare and Medicaid             | 0.03499   | 0.05767        | 0.5440  | -0.07805                      | 0.1480                        |
| Medicaid                          | 0.3913    | 0.06810        | <.0001  | 0.2578                        | 0.5248                        |
| Medicaid                          | reference | n/a            | n/a     | n/a                           | n/a.                          |
| English is Primary Language       | -0.1597   | 0.06502        | 0.0141  | -0.2871                       | -0.03218                      |
| History of Hypertension           | 0.2365    | 0.05985        | <.0001  | 0.1191                        | 0.3538                        |
| History of Coronary Heart Disease | -0.03931  | 0.04940        | 0.4262  | -0.1362                       | 0.05753                       |
| History of Depression             | -0.03699  | 0.05766        | 0.5212  | -0.1500                       | 0.07604                       |

eTable 15: Full models for association between ZIP-level mental health resources and hemoglobin A1c

|                                             | Estimate  | Standard Error     | p-value            | Lower 95% Confidence Interval | Upper 95% Confidence Interval |
|---------------------------------------------|-----------|--------------------|--------------------|-------------------------------|-------------------------------|
| History of Osteoarthritis                   | -0.1498   | 0.04009            | 0.0002             | -0.2284                       | -0.07123                      |
| Charlson Comorbidity Score                  | 0.01585   | 0.008146           | 0.0518             | -0.00012                      | 0.03182                       |
| Clinic Visits                               | 0.006518  | 0.002846           | 0.0220             | 0.000939                      | 0.01210                       |
| Clinic Connectedness                        |           |                    |                    |                               |                               |
| Connected to specific physician             | -0.08559  | 0.05429            | 0.1150             | -0.1920                       | 0.02085                       |
| Connected to specific practice              | reference | n/a                | n/a                | n/a                           | n/a.                          |
| Lives in Urban Area                         | 0.3477    | 0.1268             | 0.0061             | 0.09914                       | 0.5962                        |
| Lives in Area with Low Physical Food Access | -0.07867  | 0.06091            | 0.1966             | -0.1981                       | 0.04074                       |
| Percentage of Area Living in Group Quarters | -0.00001  | 0.000060           | 0.8517             | -0.00013                      | 0.000107                      |
| Lives in Area with Low Vehicle Access       | 0.04534   | 0.04440            | 0.3072             | -0.04169                      | 0.1324                        |
| ZIP-level Unemployment Rate                 | 0.03660   | 0.01940            | 0.0592             | -0.00143                      | 0.07462                       |
| ZIP-level Median Household Income           | 1.599E-6  | Unable to estimate | Unable to estimate | Unable to estimate            | Unable to estimate            |
| ZIP-level Poverty Rate                      | -0.00359  | 0.005889           | 0.5423             | -0.01513                      | 0.007956                      |
| ZIP-level Segregation                       | -0.00002  | 0.001802           | 0.9931             | -0.00355                      | 0.003517                      |

eTable 16: Full models for association between ZIP-level food resources and systolic blood pressure in those without hypertension

|                                 | Estimate | Standard Error | p-value | Lower 95% Confidence Interval | Upper 95% Confidence Interval |
|---------------------------------|----------|----------------|---------|-------------------------------|-------------------------------|
| Intercept                       | 118.75   | 2.4411         | <.0001  | 113.96                        | 123.54                        |
| ZIP-level food resources        | -0.08047 | 0.03550        | 0.0262  | -0.1511                       | -0.00980                      |
| ZIP-level afterschool resources | 0.06047  | 0.03336        | 0.0730  | -0.00574                      | 0.1267                        |



eTable 16: Full models for association between ZIP-level food resources and systolic blood pressure in those without hypertension

|                                 | Estimate  | Standard Error | p-value | Lower 95% Confidence Interval | Upper 95% Confidence Interval |
|---------------------------------|-----------|----------------|---------|-------------------------------|-------------------------------|
| Age, years                      | 0.1657    | 0.005420       | <.0001  | 0.1550                        | 0.1763                        |
| Female                          | -5.2802   | 0.1186         | <.0001  | -5.5126                       | -5.0477                       |
| Race/ethnicity                  |           |                |         |                               |                               |
| Asian/Multi/Other               | -2.6721   | 0.2363         | <.0001  | -3.1353                       | -2.2089                       |
| Non-Hispanic Black              | 0.6111    | 0.2706         | 0.0239  | 0.08082                       | 1.1415                        |
| Hispanic                        | -0.7475   | 0.2728         | 0.0061  | -1.2822                       | -0.2129                       |
| Non-Hispanic White              | reference | n/a            | n/a     | n/a                           | n/a.                          |
| Education                       |           |                |         |                               |                               |
| College or >                    | -0.02240  | 0.1940         | 0.9080  | -0.4026                       | 0.3577                        |
| High School Diploma             | 0.4658    | 0.2125         | 0.0284  | 0.04932                       | 0.8823                        |
| Less than High School Diploma   | 0.9903    | 0.2550         | 0.0001  | 0.4905                        | 1.4901                        |
| Unknown/Declined                | reference | n/a            | n/a     | n/a                           | n/a.                          |
| Insurance                       |           |                |         |                               |                               |
| Private                         | -4.3672   | 2.1456         | 0.0418  | -8.5725                       | -0.1618                       |
| Medicare and Medicaid           | -4.2024   | 2.1674         | 0.0525  | -8.4505                       | 0.04573                       |
| Medicaid                        | -4.6349   | 2.1479         | 0.0309  | -8.8449                       | -0.4248                       |
| Medicaid                        | -2.2777   | 2.1596         | 0.2916  | -6.5105                       | 1.9551                        |
| Self-pay                        | reference | n/a            | n/a     | n/a                           | n/a.                          |
| English is Primary Language     | 0.9827    | 0.2700         | 0.0003  | 0.4536                        | 1.5119                        |
| History of Depression           | -0.1126   | 0.2130         | 0.5970  | -0.5301                       | 0.3048                        |
| History of Osteoarthritis       | 0.5132    | 0.1754         | 0.0034  | 0.1695                        | 0.8570                        |
| Charlson Comorbidity Score      | 0.1840    | 0.04369        | <.0001  | 0.09834                       | 0.2696                        |
| Clinic Visits                   | -0.05715  | 0.01445        | <.0001  | -0.08548                      | -0.02882                      |
| Clinic Connectedness            |           |                |         |                               |                               |
| Connected to specific physician | -0.6938   | 0.1282         | <.0001  | -0.9450                       | -0.4425                       |

eTable 16: Full models for association between ZIP-level food resources and systolic blood pressure in those without hypertension

|                                             | Estimate  | Standard Error | p-value | Lower 95% Confidence Interval | Upper 95% Confidence Interval |
|---------------------------------------------|-----------|----------------|---------|-------------------------------|-------------------------------|
| Connected to specific practice              | reference | n/a            | n/a     | n/a                           | n/a.                          |
| Lives in Urban Area                         | -0.4004   | 0.3700         | 0.2793  | -1.1261                       | 0.3254                        |
| Lives in Area with Low Physical Food Access | 0.2289    | 0.1896         | 0.2274  | -0.1429                       | 0.6006                        |
| Percentage of Area Living in Group Quarters | -0.00031  | 0.000146       | 0.0348  | -0.00060                      | -0.00002                      |
| Lives in Area with Low Vehicle Access       | -0.00646  | 0.1455         | 0.9646  | -0.2917                       | 0.2788                        |
| ZIP-level Unemployment Rate                 | 0.2795    | 0.07224        | 0.0001  | 0.1373                        | 0.4218                        |
| ZIP-level Median Household Income           | -0.00002  | 3.286E-6       | <.0001  | -0.00002                      | -9.76E-6                      |
| ZIP-level Poverty Rate                      | -0.02364  | 0.02254        | 0.2968  | -0.06835                      | 0.02108                       |
| ZIP-level Segregation                       | 0.01658   | 0.006771       | 0.0154  | 0.003208                      | 0.02995                       |

**STROBE 2007 (v4) Statement—Checklist of items that should be included in reports of *cross-sectional studies***

| Section/Topic                | Item # | Recommendation                                                                                                                                                                       | Reported on page #        |
|------------------------------|--------|--------------------------------------------------------------------------------------------------------------------------------------------------------------------------------------|---------------------------|
| Title and abstract           | 1      | (a) Indicate the study's design with a commonly used term in the title or the abstract                                                                                               | 1                         |
|                              |        | (b) Provide in the abstract an informative and balanced summary of what was done and what was found                                                                                  | 3-4                       |
| <b>Introduction</b>          |        |                                                                                                                                                                                      |                           |
| Background/rationale         | 2      | Explain the scientific background and rationale for the investigation being reported                                                                                                 | 6-7                       |
| Objectives                   | 3      | State specific objectives, including any prespecified hypotheses                                                                                                                     | 7                         |
| <b>Methods</b>               |        |                                                                                                                                                                                      | <b>7-8</b>                |
| Study design                 | 4      | Present key elements of study design early in the paper                                                                                                                              |                           |
| Setting                      | 5      | Describe the setting, locations, and relevant dates, including periods of recruitment, exposure, follow-up, and data collection                                                      | 7-8                       |
| Participants                 | 6      | (a) Give the eligibility criteria, and the sources and methods of selection of participants                                                                                          | 7-8                       |
| Variables                    | 7      | Clearly define all outcomes, exposures, predictors, potential confounders, and effect modifiers. Give diagnostic criteria, if applicable                                             | 8-10                      |
| Data sources/<br>measurement | 8*     | For each variable of interest, give sources of data and details of methods of assessment (measurement). Describe comparability of assessment methods if there is more than one group | 8-10                      |
| Bias                         | 9      | Describe any efforts to address potential sources of bias                                                                                                                            | 10-13                     |
| Study size                   | 10     | Explain how the study size was arrived at                                                                                                                                            | 13                        |
| Quantitative variables       | 11     | Explain how quantitative variables were handled in the analyses. If applicable, describe which groupings were chosen and why                                                         | 10-13                     |
| Statistical methods          | 12     | (a) Describe all statistical methods, including those used to control for confounding                                                                                                | 10-13                     |
|                              |        | (b) Describe any methods used to examine subgroups and interactions                                                                                                                  | 10-13, technical appendix |
|                              |        | (c) Explain how missing data were addressed                                                                                                                                          | 10-13                     |
|                              |        | (d) If applicable, describe analytical methods taking account of sampling strategy                                                                                                   | 10-13                     |
|                              |        | (e) Describe any sensitivity analyses                                                                                                                                                | 10-13                     |

|                          |     |                                                                                                                                                                                                              |                            |
|--------------------------|-----|--------------------------------------------------------------------------------------------------------------------------------------------------------------------------------------------------------------|----------------------------|
| <b>Results</b>           |     |                                                                                                                                                                                                              |                            |
| Participants             | 13* | (a) Report numbers of individuals at each stage of study—eg numbers potentially eligible, examined for eligibility, confirmed eligible, included in the study, completing follow-up, and analysed            | 13                         |
|                          |     | (b) Give reasons for non-participation at each stage                                                                                                                                                         | 13                         |
|                          |     | (c) Consider use of a flow diagram                                                                                                                                                                           | n/a                        |
| Descriptive data         | 14* | (a) Give characteristics of study participants (eg demographic, clinical, social) and information on exposures and potential confounders                                                                     | 13-14, table 1, tables 2-3 |
|                          |     | (b) Indicate number of participants with missing data for each variable of interest                                                                                                                          | Tables 2-3                 |
| Outcome data             | 15* | Report numbers of outcome events or summary measures                                                                                                                                                         | 14-15                      |
| Main results             | 16  | (a) Give unadjusted estimates and, if applicable, confounder-adjusted estimates and their precision (eg, 95% confidence interval). Make clear which confounders were adjusted for and why they were included | 14-15                      |
|                          |     | (b) Report category boundaries when continuous variables were categorized                                                                                                                                    | n/a                        |
|                          |     | (c) If relevant, consider translating estimates of relative risk into absolute risk for a meaningful time period                                                                                             | n/a                        |
| Other analyses           | 17  | Report other analyses done—eg analyses of subgroups and interactions, and sensitivity analyses                                                                                                               | 14-16, eappendix           |
| <b>Discussion</b>        |     |                                                                                                                                                                                                              |                            |
| Key results              | 18  | Summarise key results with reference to study objectives                                                                                                                                                     | 16                         |
| Limitations              | 19  | Discuss limitations of the study, taking into account sources of potential bias or imprecision. Discuss both direction and magnitude of any potential bias                                                   | 18-19                      |
| Interpretation           | 20  | Give a cautious overall interpretation of results considering objectives, limitations, multiplicity of analyses, results from similar studies, and other relevant evidence                                   | 19                         |
| Generalisability         | 21  | Discuss the generalisability (external validity) of the study results                                                                                                                                        | 19                         |
| <b>Other information</b> |     |                                                                                                                                                                                                              |                            |
| Funding                  | 22  | Give the source of funding and the role of the funders for the present study and, if applicable, for the original study on which the present article is based                                                | 20                         |

\*Give information separately for cases and controls in case-control studies and, if applicable, for exposed and unexposed groups in cohort and cross-sectional studies.

**Note:** An Explanation and Elaboration article discusses each checklist item and gives methodological background and published examples of transparent reporting. The STROBE checklist is best used in conjunction with this article (freely available on the Web sites of PLoS Medicine at <http://www.plosmedicine.org/>, Annals of Internal Medicine at <http://www.annals.org/>, and Epidemiology at <http://www.epidem.com/>). Information on the STROBE Initiative is available at [www.strobe-statement.org](http://www.strobe-statement.org).
