# Supplementary material for: Association between access to social service resources and cardiometabolic risk factors: a machine learning and multilevel modeling analysis
Source: PubMed Central journal article supplement — BMJ Open. 2019 Mar 12;9(3):e025281. doi: 10.1136/bmjopen-2018-025281 (PMC6429845; doi:10.1136/bmjopen-2018-025281), 2019-03-12
Supplement: bmjopen-2018-025281supp001.pdf [file bmjopen-2018-025281supp001.pdf]

eAppendix for Association Between Area Resources and Cardiometabolic Risk: A Machine Learning and Multi-Level Modeling Analysis

## Technical Appendix

### VSURF

The foundation of the VSURF technique is the decision tree (eFigure 1).<sup>21</sup> To construct a single decision tree, the procedure selects a random subset of variables from the total number of available variables, and selects a variable that best explains the variation in outcome of a bootstrap resample drawn from the derivation sample. For the next split, the variable that best explains the variation within each ‘branch’ of the tree created in the first split is selected. This process is continued until optimal separation is achieved. A ‘forest’ is grown by repeating this process 2000 times, each time randomly drawing a subset of variables and bootstrap resample of the derivation cohort. In the VSURF procedure, 50 forests of 2000 trees were grown in the initial ‘thresholding’ step, which focuses on removing irrelevant variables. Then, 25 forests of 2000 trees, using the remaining variables, were grown to select all variables associated with the response. Finally, 25 forests of 2000 trees were grown, selecting among the remaining variables to eliminate redundancy. After all three steps were completed, we selected up to the top three area resources, as indicated by variable importance factors in the final step, for hypothesis testing in the independent, ‘testing’ sample.

A major advantage of VSURF is that it directly addresses the correlation among variables, as the single best variable is selected at each split and thus the explanatory power is not divided amongst two or more related variables, as in linear regression. Secondly, VSURF allows one to screen through a number of candidate variables while preserving type I error rate, as statistical

significance testing is not used in the selection of variables, unlike p-value-based selection algorithms.

eFigure 1: Depiction of the Variable Selection Using Random Forest (VSURF) Method

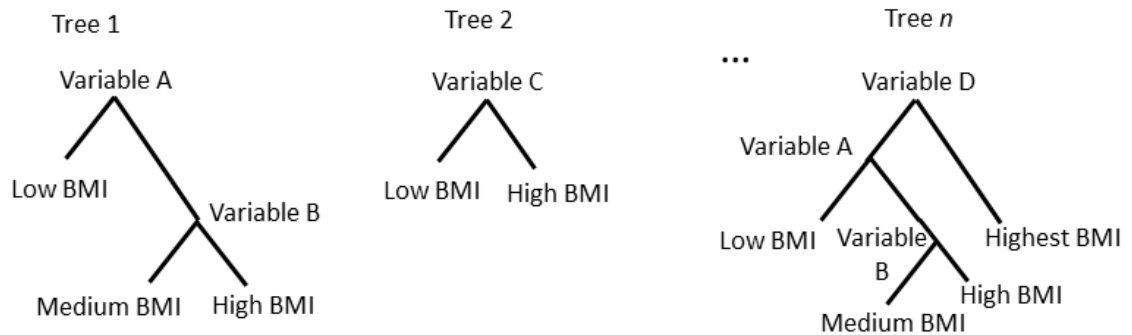

From a random subset of variables and a bootstrap resample of individuals in the derivation cohort, a decision tree that optimally splits the sample is created. This process is repeated in a second bootstrap resample with a second randomly selected subset of variables, and so on until  $n$  trees ( $n=2000$  in this study) are aggregated to create one forest. The forest-growing procedure is repeated 50 times. Then, using variable importance factors, which indicate the variables that are most useful in minimizing the error of predicted values in the 'out-of-bag' sample (those observations that, due to chance, were not selected in the bootstrap resample). After removing the least important variables, the entire process is repeated again, this time growing 25 forests of 2000 trees, in the 'interpretation' step, which focuses on selecting all variables associated with the response. Finally, to deal with correlations between variables, the process is repeated again, growing 25 more forests of 2000 trees, in the 'prediction' step, which focuses on removing redundancy in the final set of variables.



eFigure 3: Nutrition Resources by ZIP

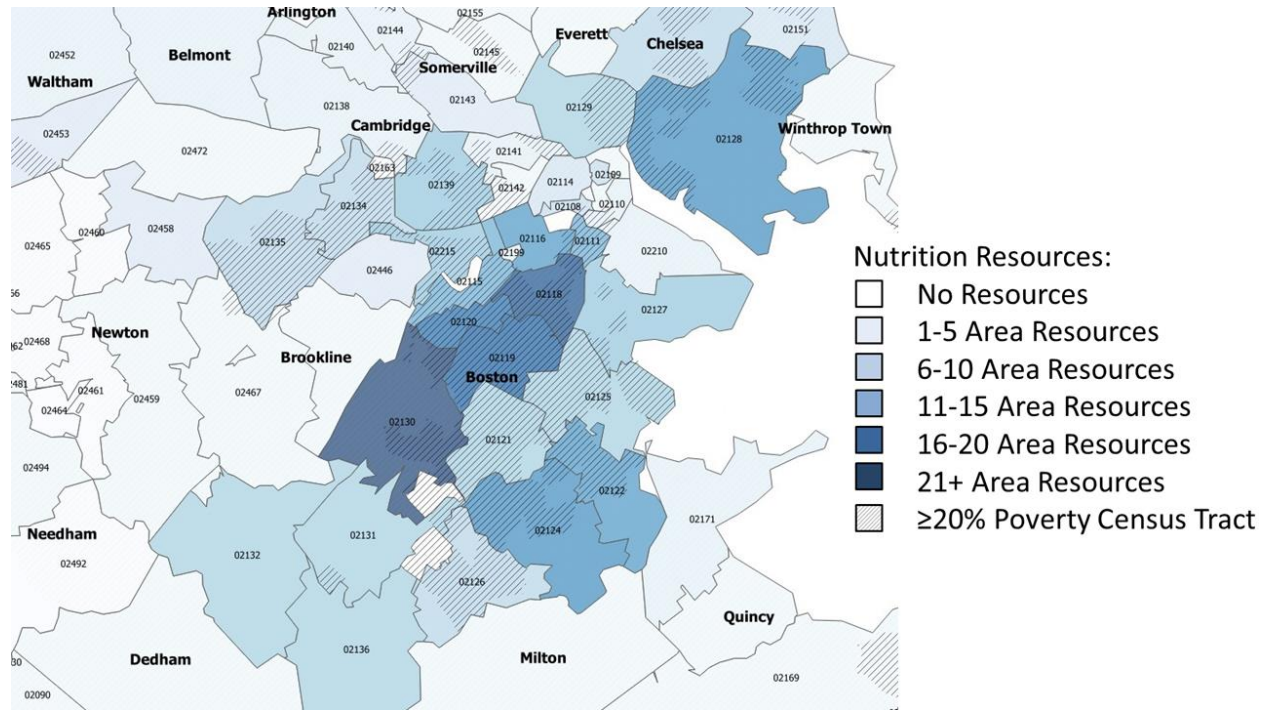

eTable 1: Demographics for Hypertension Study Sample

|                                       | N=43,509            |
|---------------------------------------|---------------------|
|                                       | Mean (SD) or n (%)  |
| Age                                   | 64.67 (14.05)       |
| Male                                  | 21299 (49.0)        |
| Race/ethnicity                        |                     |
| Asian/Multi/Other                     | 1755 (4.0)          |
| Non-Hispanic Black                    | 3138 (7.2)          |
| Hispanic                              | 1983 (4.6)          |
| Non-Hispanic White                    | 36633 (84.2)        |
| Education                             |                     |
| College or >                          | 15660 (36.0)        |
| High School Diploma                   | 15900 (36.5)        |
| Less than High School Diploma         | 7422 (17.1)         |
| Unknown/Declined                      | 4527 (10.4)         |
| Insurance                             |                     |
| Private                               | 17256 (39.7)        |
| Medicare and Medicaid                 | 6200 (14.2)         |
| Medicaid                              | 6292 (14.5)         |
| Medicare                              | 13756 (31.6)        |
| Self-pay                              | 5 (0.0)             |
| English is Primary Language           | 39492 (90.8)        |
| History of Coronary Heart Disease     | 8373 (19.2)         |
| History of Diabetes Mellitus          | 11085 (25.5)        |
| History of Depression                 | 4745 (10.9)         |
| History of Osteoarthritis             | 14931 (34.3)        |
| Charlson Comorbidity Score            | 3.22 (2.57)         |
| Clinic Visits                         | 9.58 (6.77)         |
| Clinic Connectedness                  |                     |
| Connected to specific physician       | 36233 (83.3)        |
| Connected to specific practice        | 6978 (16.0)         |
| Other                                 | 298 (0.7)           |
| Lives in Urban Area                   | 32075 (96.4)        |
| ZIP-level Unemployment Rate, %        | 4.85 (1.63)         |
| ZIP-level Median Household Income, \$ | 80247.61 (31190.75) |
| ZIP-level Poverty Rate, %             | 8.67 (6.63)         |
| ZIP-level Segregation                 | 69.19 (21.92)       |
| Body Mass Index, kg/m <sup>2</sup>    | 29.68 (6.40)        |
| History of Obesity                    | 19314 (45.2)        |
| Systolic Blood Pressure, mm Hg        | 131.60 (15.75)      |

|                        |                |
|------------------------|----------------|
| LDL cholesterol, mg/dL | 102.73 (39.82) |
| Hemoglobin A1c, %      | 6.25 (1.34)    |



eTable 2: Demographics for LDL Study Sample

|                                       | N=46940             |
|---------------------------------------|---------------------|
|                                       | Mean (SD) or n (%)  |
| Age                                   | 63.96 (14.33)       |
| Male                                  | 22916 (48.8)        |
| Race/ethnicity                        |                     |
| Asian/Multi/Other                     | 1971 (4.2)          |
| Non-Hispanic Black                    | 3401 (7.2)          |
| Hispanic                              | 2285 (4.9)          |
| Non-Hispanic White                    | 39283 (83.7)        |
| Education                             |                     |
| College or >                          | 16940 (36.1)        |
| High School Diploma                   | 17032 (36.3)        |
| Less than High School Diploma         | 8075 (17.2)         |
| Unknown/Declined                      | 4893 (10.4)         |
| Insurance                             |                     |
| Private                               | 18909 (40.3)        |
| Medicare and Medicaid                 | 6561 (14.0)         |
| Medicaid                              | 7169 (15.3)         |
| Medicare                              | 14296 (30.5)        |
| Self-pay                              | 5 (0.0)             |
| English is Primary Language           | 42468 (90.5)        |
| History of Hypertension               | 43509 (92.7)        |
| History of Coronary Heart Disease     | 9275 (19.8)         |
| History of Diabetes Mellitus          | 13127 (28.0)        |
| History of Depression                 | 5160 (11.0)         |
| History of Osteoarthritis             | 15695 (33.4)        |
| Charlson Comorbidity Score            | 3.14 (2.54)         |
| Clinic Visits                         | 9.46 (6.71)         |
| Clinic Connectedness                  |                     |
| Connected to specific physician       | 38851 (82.8)        |
| Connected to specific practice        | 7746 (16.5)         |
| Other                                 | 343 (0.7)           |
| Lives in Urban Area                   | 34532 (96.4)        |
| ZIP-level Unemployment Rate, %        | 4.86 (1.63)         |
| ZIP-level Median Household Income, \$ | 80079.26 (31173.63) |
| ZIP-level Poverty Rate, %             | 8.72 (6.64)         |
| ZIP-level Segregation                 | 68.98 (21.98)       |
| Body Mass Index, kg/m <sup>2</sup>    | 29.63 (6.42)        |
| History of Obesity                    | 20611 (44.7)        |
| Systolic Blood Pressure, mm Hg        | 130.88 (15.75)      |

|                        |                |
|------------------------|----------------|
| LDL cholesterol, mg/dL | 102.85 (39.81) |
| Hemoglobin A1c, %      | 6.28 (1.36)    |

eTable 3: Demographics for Diabetes Study Sample

|                                       | N=13127             |
|---------------------------------------|---------------------|
|                                       | Mean (SD) or n (%)  |
| Age                                   | 64.12 (14.10)       |
| Male                                  | 6722 (51.2)         |
| Race/ethnicity                        |                     |
| Asian/Multi/Other                     | 729 (5.6)           |
| Non-Hispanic Black                    | 1415 (10.8)         |
| Hispanic                              | 986 (7.5)           |
| Non-Hispanic White                    | 9995 (76.1)         |
| Education                             |                     |
| College or >                          | 3691 (28.1)         |
| High School Diploma                   | 5115 (39.0)         |
| Less than High School Diploma         | 3085 (23.5)         |
| Unknown/Declined                      | 1236 (9.4)          |
| Insurance                             |                     |
| Private                               | 4247 (32.4)         |
| Medicare and Medicaid                 | 2609 (19.9)         |
| Medicaid                              | 2654 (20.2)         |
| Medicare                              | 3617 (27.6)         |
| Self-pay                              | 0 (0.0)             |
| English is Primary Language           | 11138 (84.8)        |
| History of Hypertension               | 11085 (84.4)        |
| History of Coronary Heart Disease     | 3316 (25.3)         |
| History of Diabetes Mellitus          | 13127 (100.0)       |
| History of Depression                 | 1685 (12.8)         |
| History of Osteoarthritis             | 4605 (35.1)         |
| Charlson Comorbidity Score            | 4.34 (2.94)         |
| Clinic Visits                         | 11.59 (7.52)        |
| Clinic Connectedness                  |                     |
| Connected to specific physician       | 10778 (82.1)        |
| Connected to specific practice        | 2234 (17.0)         |
| Other                                 | 115 (0.9)           |
| Lives in Urban Area                   | 9467 (97.4)         |
| ZIP-level Unemployment Rate, %        | 5.24 (1.67)         |
| ZIP-level Median Household Income, \$ | 72660.30 (28239.05) |
| ZIP-level Poverty Rate, %             | 10.19 (6.83)        |
| ZIP-level Segregation                 | 63.62 (23.80)       |
| Body Mass Index, kg/m <sup>2</sup>    | 31.48 (6.85)        |
| History of Obesity                    | 7427 (57.7)         |
| Systolic Blood Pressure, mm Hg        | 130.17 (16.09)      |

|                        |               |
|------------------------|---------------|
| LDL cholesterol, mg/dL | 89.25 (37.45) |
| Hemoglobin A1c, %      | 7.08 (1.52)   |

eTable 4: Demographics of study sample by number of food resources in ZIP code tabulation area

|                                       | 0 food resources    | 1 to 7 food resources | ≥8 food resources   | p      |
|---------------------------------------|---------------------|-----------------------|---------------------|--------|
|                                       | N=65011             | N=42794               | N=13028             |        |
|                                       | Mean (SD) or n (%)  | Mean (SD) or n (%)    | Mean (SD) or n (%)  |        |
| Age                                   | 53.93 (16.13)       | 51.05 (17.69)         | 47.95 (16.92)       | <0.001 |
| Male                                  | 28050 (43.1)        | 17330 (40.5)          | 5163 (39.6)         | <0.001 |
| Race/ethnicity                        |                     |                       |                     | <0.001 |
| Asian/Multi/Other                     | 3559 (5.5)          | 2501 (5.8)            | 709 (5.4)           |        |
| Non-Hispanic Black                    | 2553 (3.9)          | 2710 (6.3)            | 1605 (12.3)         |        |
| Hispanic                              | 2306 (3.5)          | 2859 (6.7)            | 2707 (20.8)         |        |
| Non-Hispanic White                    | 56593 (87.1)        | 34724 (81.1)          | 8007 (61.5)         |        |
| Education                             |                     |                       |                     | <0.001 |
| College or >                          | 31782 (48.9)        | 18895 (44.2)          | 4837 (37.1)         |        |
| High School Diploma                   | 18400 (28.3)        | 13355 (31.2)          | 3767 (28.9)         |        |
| Less than High School Diploma         | 7373 (11.3)         | 6762 (15.8)           | 3449 (26.5)         |        |
| Unknown/Declined                      | 7456 (11.5)         | 3782 (8.8)            | 975 (7.5)           |        |
| Insurance                             |                     |                       |                     | <0.001 |
| Private                               | 44051 (67.8)        | 24062 (56.2)          | 6600 (50.7)         |        |
| Medicare and Medicaid                 | 3485 (5.4)          | 3551 (8.3)            | 1188 (9.1)          |        |
| Medicaid                              | 7319 (11.3)         | 9011 (21.1)           | 4075 (31.3)         |        |
| Medicare                              | 10128 (15.6)        | 6093 (14.2)           | 1149 (8.8)          |        |
| Self-pay                              | 28 (0.0)            | 77 (0.2)              | 16 (0.1)            |        |
| English is Primary Language           | 61559 (94.7)        | 38982 (91.1)          | 9923 (76.2)         | <0.001 |
| History of Hypertension               | 22195 (34.1)        | 15367 (35.9)          | 4342 (33.3)         | <0.001 |
| History of Coronary Heart Disease     | 4663 (7.2)          | 3385 (7.9)            | 817 (6.3)           | <0.001 |
| History of Cerebrovascular Disease    | 1628 (2.5)          | 1148 (2.7)            | 316 (2.4)           | 0.114  |
| History of Congestive Heart Failure   | 1941 (3.0)          | 1793 (4.2)            | 460 (3.5)           | <0.001 |
| History of Diabetes Mellitus          | 5735 (8.8)          | 4757 (11.1)           | 1735 (13.3)         | <0.001 |
| History of Depression                 | 4598 (7.1)          | 4024 (9.4)            | 1377 (10.6)         | <0.001 |
| History of Osteoarthritis             | 12179 (18.7)        | 8386 (19.6)           | 2331 (17.9)         | <0.001 |
| Charlson Comorbidity Score            | 1.70 (2.17)         | 1.72 (2.28)           | 1.56 (2.15)         | <0.001 |
| Clinic Visits                         | 5.93 (5.18)         | 7.14 (6.21)           | 7.19 (6.11)         | <0.001 |
| Clinic Connectedness                  |                     |                       |                     | <0.001 |
| Connected to specific physician       | 41292 (63.5)        | 28457 (66.5)          | 8593 (66.0)         |        |
| Connected to specific practice        | 14727 (22.7)        | 14337 (33.5)          | 4435 (34.0)         |        |
| Other                                 | 8992 (13.8)         | 0 (0.0)               | 0 (0.0)             |        |
| Lives in Urban Area                   | 52165 (94.3)        | 29291 (99.4)          | 7118 (99.9)         | <0.001 |
| ZIP-level Unemployment Rate, %        | 4.27 (1.41)         | 4.89 (1.51)           | 5.82 (1.83)         | <0.001 |
| ZIP-level Median Household Income, \$ | 96937.11 (34242.61) | 71648.83 (21514.21)   | 58606.22 (17651.59) | <0.001 |

|                                    |                |                |                |        |
|------------------------------------|----------------|----------------|----------------|--------|
| ZIP-level Poverty Rate, %          | 4.91 (4.58)    | 11.12 (6.26)   | 15.94 (5.58)   | <0.001 |
| ZIP-level Segregation              | 80.59 (15.85)  | 65.17 (15.29)  | 39.16 (20.13)  | <0.001 |
| Body Mass Index, kg/m <sup>2</sup> | 27.64 (6.03)   | 27.82 (6.34)   | 28.30 (6.63)   | <0.001 |
| History of Obesity                 | 18693 (30.1)   | 12765 (30.8)   | 4148 (33.2)    | <0.001 |
| Systolic Blood Pressure, mm Hg     | 124.47 (14.92) | 124.27 (15.03) | 123.44 (14.80) | <0.001 |
| LDL cholesterol, mg/dL             | 112.17 (42.48) | 109.92 (37.14) | 108.83 (35.34) | <0.001 |
| Hemoglobin A1c, %                  | 5.86 (1.12)    | 5.98 (1.25)    | 6.13 (1.43)    | <0.001 |

Robustness checks (eTable 5-7)

Results from analyses, adjusted for the same factors as in main model presented in the manuscript, comparing the association of food resources and BMI with different specifications of ZIP-level food resources (count, count per capita, and count per capita living in poverty) show that the association between more area food resources and lower BMI is robust to different specifications of number of resources

eTable 5: Analyses comparing the association of food resources and BMI with different specifications of area-resources

|                                                                                                                                      |                                                                                                                          |                                                                                                                                            |
|--------------------------------------------------------------------------------------------------------------------------------------|--------------------------------------------------------------------------------------------------------------------------|--------------------------------------------------------------------------------------------------------------------------------------------|
| Estimated difference in BMI associated with 1 additional ZIP-level resource (95% CI), kg/m <sup>2</sup> (main model from manuscript) | Estimated difference in BMI associated with 1 additional ZIP-level resource per 10000 people (95% CI), kg/m <sup>2</sup> | Estimated difference in BMI associated with 1 additional ZIP-level resource per 10000 people living in poverty (95% CI), kg/m <sup>2</sup> |
| -0.08 (-0.13 to -0.03)                                                                                                               | -0.19 (-0.29 to -0.085)                                                                                                  | -0.02 (-0.03 to -0.01)                                                                                                                     |

Analyses, adjusted for the same factors as in main model presented in the manuscript, including a quadratic and/or cubic term, or restricted cubic splines, to represent the number of ZIP-level resources resulted in worse model fit by Akaike information criterion and Bayes information criterion, suggesting that a linear approximation of the relationship between ZIP-level resources and the modeled outcome is reasonable.

| eTable 6: Model fit statistics from different specifications of ZIP-level food resources |                                                              |                                                             |
|------------------------------------------------------------------------------------------|--------------------------------------------------------------|-------------------------------------------------------------|
|                                                                                          | Akaike information criterion (smaller represents better fit) | Bayes information criterion (smaller represents better fit) |
| Linear term only                                                                         | 468646.6                                                     | 468640.6                                                    |
| Linear plus quadratic                                                                    | 468656.5                                                     | 468650.5                                                    |
| Linear, quadratic, and cubic                                                             | 468667.8                                                     | 468661.8                                                    |
| Restricted cubic spline                                                                  | 468656.0                                                     | 468650.0                                                    |

Analyses, adjusted for the same factors as in main model presented in the manuscript, restricted to those with indicators of lower socioeconomic status show that the estimates for the association between additional ZIP-level food resources and BMI are slightly larger than in the overall population, which is consistent with the idea that these resources are beneficial for those with lower socioeconomic status

eTable 7: Analyses of association between ZIP-level food resources and body mass index, restricted to those with indicators of lower socioeconomic status

|                                                                                                                                            |                                                                                                                                                                                             |                                                                                                                                                                                  |
|--------------------------------------------------------------------------------------------------------------------------------------------|---------------------------------------------------------------------------------------------------------------------------------------------------------------------------------------------|----------------------------------------------------------------------------------------------------------------------------------------------------------------------------------|
| <p>Estimated difference in BMI associated with 1 additional ZIP-level resource (95% CI), kg/m<sup>2</sup> (main model from manuscript)</p> | <p>Estimated difference in BMI associated with 1 additional ZIP-level resource (95% CI), restricted to those with high school diploma or lower educational attainment, kg/m<sup>2</sup></p> | <p>Estimated difference in BMI associated with 1 additional ZIP-level resource (95% CI), restricted to those living in ZIP with &gt; 15% living in poverty, kg/m<sup>2</sup></p> |
| <p>-0.08 (-0.13 to -0.03)</p>                                                                                                              | <p>-0.09 (-0.15 to -0.04)</p>                                                                                                                                                               | <p>-0.11 (-0.17 to -0.06)</p>                                                                                                                                                    |



eTable 8: Full models for association between ZIP-level food resources and body mass index

|                                   | Estimate  | Standard Error | p-value | Lower 95% Confidence Interval | Upper 95% Confidence Interval |
|-----------------------------------|-----------|----------------|---------|-------------------------------|-------------------------------|
| Intercept                         | 28.2196   | 1.1796         | <.0001  | 25.9071                       | 30.5320                       |
| ZIP-level food resources          | -0.08429  | 0.02512        | 0.0010  | -0.1340                       | -0.03460                      |
| ZIP-level afterschool resources   | 0.009484  | 0.02203        | 0.6674  | -0.03404                      | 0.05301                       |
| Age, years                        | -0.04950  | 0.002011       | <.0001  | -0.05344                      | -0.04556                      |
| Female                            | -1.3794   | 0.04395        | <.0001  | -1.4656                       | -1.2933                       |
| Race/ethnicity                    |           |                |         |                               |                               |
| Asian/Multi/Other                 | -2.5117   | 0.09328        | <.0001  | -2.6945                       | -2.3288                       |
| Non-Hispanic Black                | 0.9600    | 0.09753        | <.0001  | 0.7688                        | 1.1511                        |
| Hispanic                          | 0.7277    | 0.1081         | <.0001  | 0.5157                        | 0.9396                        |
| Non-Hispanic White                | reference | n/a            | n/a     | n/a                           | n/a                           |
| Education                         |           |                |         |                               |                               |
| College or >                      | -0.2793   | 0.07082        | <.0001  | -0.4181                       | -0.1404                       |
| High School Diploma               | 0.09622   | 0.07549        | 0.2025  | -0.05175                      | 0.2442                        |
| Less than High School Diploma     | 0.3871    | 0.09117        | <.0001  | 0.2084                        | 0.5658                        |
| Unknown/Declined                  | reference | n/a            | n/a     | n/a                           | n/a                           |
| Insurance                         |           |                |         |                               |                               |
| Private                           | 0.1890    | 1.0208         | 0.8531  | -1.8118                       | 2.1898                        |
| Medicare and Medicaid             | 0.06964   | 1.0240         | 0.9458  | -1.9374                       | 2.0767                        |
| Medicaid                          | 0.6961    | 1.0215         | 0.4956  | -1.3061                       | 2.6983                        |
| Medicaid                          | -0.4968   | 1.0230         | 0.6272  | -2.5019                       | 1.5083                        |
| Self-pay                          | reference | n/a            | n/a     | n/a                           | n/a                           |
| English is Primary Language       | 0.7128    | 0.09604        | <.0001  | 0.5246                        | 0.9011                        |
| History of Hypertension           | 2.7291    | 0.05550        | <.0001  | 2.6203                        | 2.8379                        |
| History of Coronary Heart Disease | -0.4141   | 0.08601        | <.0001  | -0.5827                       | -0.2455                       |
| History of Diabetes Mellitus      | 2.4217    | 0.07471        | <.0001  | 2.2752                        | 2.5681                        |

eTable 8: Full models for association between ZIP-level food resources and body mass index

|                                             | Estimate  | Standard Error | p-value | Lower 95% Confidence Interval | Upper 95% Confidence Interval |
|---------------------------------------------|-----------|----------------|---------|-------------------------------|-------------------------------|
| History of Depression                       | 0.5488    | 0.07350        | <.0001  | 0.4048                        | 0.6929                        |
| History of Osteoarthritis                   | 1.3188    | 0.05467        | <.0001  | 1.2116                        | 1.4260                        |
| Charlson Comorbidity Score                  | 0.06713   | 0.01268        | <.0001  | 0.04227                       | 0.09198                       |
| Clinic Visits                               | -0.00068  | 0.004383       | 0.8770  | -0.00927                      | 0.007911                      |
| Clinic Connectedness                        |           |                |         |                               |                               |
| Connected to specific physician             | 0.3184    | 0.05024        | <.0001  | 0.2200                        | 0.4169                        |
| Connected to specific practice              | reference | n/a            | n/a     | n/a                           | n/a                           |
| Lives in Urban Area                         | 0.2640    | 0.1580         | 0.0949  | -0.04583                      | 0.5739                        |
| Lives in Area with Low Physical Food Access | 0.09426   | 0.07794        | 0.2265  | -0.05851                      | 0.2470                        |
| Percentage of Area Living in Group Quarters | -0.00020  | 0.000060       | 0.0009  | -0.00032                      | -0.00008                      |
| Lives in Area with Low Vehicle Access       | 0.1189    | 0.05577        | 0.0331  | 0.009564                      | 0.2282                        |
| ZIP-level Unemployment Rate                 | 0.2608    | 0.03829        | <.0001  | 0.1855                        | 0.3361                        |
| ZIP-level Median Household Income           | -0.00001  | 1.936E-6       | <.0001  | -0.00002                      | -8.81E-6                      |
| ZIP-level Poverty Rate                      | -0.03254  | 0.01370        | 0.0183  | -0.05952                      | -0.00555                      |
| ZIP-level Segregation                       | 0.002536  | 0.003897       | 0.5158  | -0.00514                      | 0.01021                       |

eTable 9: Full models for association between ZIP-level employment resources and body mass index

|                                | Estimate | Standard Error | p-value | Lower 95% Confidence Interval | Upper 95% Confidence Interval |
|--------------------------------|----------|----------------|---------|-------------------------------|-------------------------------|
| Intercept                      | 28.1779  | 1.1847         | <.0001  | 25.8554                       | 30.5004                       |
| ZIP-level employment resources | -0.05415 | 0.02624        | 0.0407  | -0.1060                       | -0.00231                      |

eTable 9: Full models for association between ZIP-level employment resources and body mass index

|                                   | Estimate  | Standard Error | p-value | Lower 95% Confidence Interval | Upper 95% Confidence Interval |
|-----------------------------------|-----------|----------------|---------|-------------------------------|-------------------------------|
| ZIP-level afterschool resources   | 0.01083   | 0.03215        | 0.7366  | -0.05269                      | 0.07436                       |
| Age, years                        | -0.04951  | 0.002011       | <.0001  | -0.05345                      | -0.04557                      |
| Female                            | -1.3795   | 0.04395        | <.0001  | -1.4656                       | -1.2933                       |
| Race/ethnicity                    |           |                |         |                               |                               |
| Asian/Multi/Other                 | -2.5089   | 0.09330        | <.0001  | -2.6918                       | -2.3260                       |
| Non-Hispanic Black                | 0.9669    | 0.09755        | <.0001  | 0.7757                        | 1.1581                        |
| Hispanic                          | 0.7300    | 0.1081         | <.0001  | 0.5181                        | 0.9420                        |
| Non-Hispanic White                | reference | n/a            | n/a     | n/a                           | n/a                           |
| Education                         |           |                |         |                               |                               |
| College or >                      | -0.2787   | 0.07083        | <.0001  | -0.4175                       | -0.1399                       |
| High School Diploma               | 0.09646   | 0.07549        | 0.2013  | -0.05150                      | 0.2444                        |
| Less than High School Diploma     | 0.3880    | 0.09117        | <.0001  | 0.2093                        | 0.5667                        |
| Unknown/Declined                  | reference | n/a            | n/a     | n/a                           | n/a                           |
| Insurance                         |           |                |         |                               |                               |
| Private                           | 0.1930    | 1.0208         | 0.8500  | -1.8078                       | 2.1938                        |
| Medicare and Medicaid             | 0.07527   | 1.0240         | 0.9414  | -1.9318                       | 2.0823                        |
| Medicaid                          | 0.7010    | 1.0215         | 0.4926  | -1.3012                       | 2.7032                        |
| Medicaid                          | -0.4922   | 1.0230         | 0.6304  | -2.4973                       | 1.5128                        |
| Self-pay                          | reference | n/a            | n/a     | n/a                           | n/a                           |
| English is Primary Language       | 0.7126    | 0.09604        | <.0001  | 0.5243                        | 0.9008                        |
| History of Hypertension           | 2.7296    | 0.05550        | <.0001  | 2.6208                        | 2.8383                        |
| History of Coronary Heart Disease | -0.4138   | 0.08601        | <.0001  | -0.5824                       | -0.2452                       |
| History of Diabetes Mellitus      | 2.4215    | 0.07471        | <.0001  | 2.2751                        | 2.5680                        |
| History of Depression             | 0.5493    | 0.07350        | <.0001  | 0.4052                        | 0.6933                        |
| History of Osteoarthritis         | 1.3190    | 0.05467        | <.0001  | 1.2118                        | 1.4261                        |

eTable 9: Full models for association between ZIP-level employment resources and body mass index

|                                             | Estimate  | Standard Error | p-value | Lower 95% Confidence Interval | Upper 95% Confidence Interval |
|---------------------------------------------|-----------|----------------|---------|-------------------------------|-------------------------------|
| Charlson Comorbidity Score                  | 0.06713   | 0.01268        | <.0001  | 0.04227                       | 0.09198                       |
| Clinic Visits                               | -0.00069  | 0.004383       | 0.8744  | -0.00928                      | 0.007897                      |
| Clinic Connectedness                        |           |                |         |                               |                               |
| Connected to specific physician             | 0.3181    | 0.05024        | <.0001  | 0.2197                        | 0.4166                        |
| Connected to specific practice              | reference | n/a            | n/a     | n/a                           | n/a                           |
| Lives in Urban Area                         | 0.2569    | 0.1589         | 0.1059  | -0.05456                      | 0.5684                        |
| Lives in Area with Low Physical Food Access | 0.09945   | 0.07799        | 0.2023  | -0.05342                      | 0.2523                        |
| Percentage of Area Living in Group Quarters | -0.00019  | 0.000060       | 0.0013  | -0.00031                      | -0.00008                      |
| Lives in Area with Low Vehicle Access       | 0.1198    | 0.05586        | 0.0320  | 0.01027                       | 0.2293                        |
| ZIP-level Unemployment Rate                 | 0.2601    | 0.03946        | <.0001  | 0.1825                        | 0.3377                        |
| ZIP-level Median Household Income           | -0.00001  | 1.988E-6       | <.0001  | -0.00002                      | -8.84E-6                      |
| ZIP-level Poverty Rate                      | -0.03147  | 0.01401        | 0.0255  | -0.05905                      | -0.00389                      |
| ZIP-level Segregation                       | 0.003079  | 0.003968       | 0.4385  | -0.00473                      | 0.01089                       |

eTable 10: Full models for association between ZIP-level nutrition resources and body mass index

|                                   | Estimate  | Standard Error | p-value | Lower 95% Confidence Interval | Upper 95% Confidence Interval |
|-----------------------------------|-----------|----------------|---------|-------------------------------|-------------------------------|
| Intercept                         | 28.1161   | 1.1836         | <.0001  | 25.7958                       | 30.4364                       |
| ZIP-level nutrition resources     | -0.07146  | 0.03122        | 0.0234  | -0.1331                       | -0.00980                      |
| ZIP-level afterschool resources   | 0.002639  | 0.02650        | 0.9208  | -0.04967                      | 0.05495                       |
| Age, years                        | -0.04949  | 0.002011       | <.0001  | -0.05344                      | -0.04555                      |
| Female                            | -1.3792   | 0.04395        | <.0001  | -1.4654                       | -1.2931                       |
| Race/ethnicity                    |           |                |         |                               |                               |
| Asian/Multi/Other                 | -2.5116   | 0.09329        | <.0001  | -2.6944                       | -2.3287                       |
| Non-Hispanic Black                | 0.9650    | 0.09756        | <.0001  | 0.7738                        | 1.1562                        |
| Hispanic                          | 0.7272    | 0.1081         | <.0001  | 0.5152                        | 0.9392                        |
| Non-Hispanic White                | reference | n/a            | n/a     | n/a                           | n/a                           |
| Education                         |           |                |         |                               |                               |
| College or >                      | -0.2787   | 0.07082        | <.0001  | -0.4175                       | -0.1399                       |
| High School Diploma               | 0.09695   | 0.07549        | 0.1991  | -0.05102                      | 0.2449                        |
| Less than High School Diploma     | 0.3870    | 0.09117        | <.0001  | 0.2083                        | 0.5657                        |
| Unknown/Declined                  | reference | n/a            | n/a     | n/a                           | n/a                           |
| Insurance                         |           |                |         |                               |                               |
| Private                           | 0.1858    | 1.0208         | 0.8555  | -1.8150                       | 2.1866                        |
| Medicare and Medicaid             | 0.06642   | 1.0240         | 0.9483  | -1.9406                       | 2.0735                        |
| Medicaid                          | 0.6927    | 1.0215         | 0.4977  | -1.3095                       | 2.6948                        |
| Medicaid                          | -0.5000   | 1.0230         | 0.6250  | -2.5050                       | 1.5051                        |
| Self-pay                          | reference | n/a            | n/a     | n/a                           | n/a.                          |
| English is Primary Language       | 0.7143    | 0.09604        | <.0001  | 0.5261                        | 0.9026                        |
| History of Hypertension           | 2.7290    | 0.05550        | <.0001  | 2.6202                        | 2.8378                        |
| History of Coronary Heart Disease | -0.4139   | 0.08601        | <.0001  | -0.5825                       | -0.2453                       |
| History of Diabetes Mellitus      | 2.4211    | 0.07471        | <.0001  | 2.2747                        | 2.5676                        |

eTable 10: Full models for association between ZIP-level nutrition resources and body mass index

|                                             | Estimate  | Standard Error | p-value | Lower 95% Confidence Interval | Upper 95% Confidence Interval |
|---------------------------------------------|-----------|----------------|---------|-------------------------------|-------------------------------|
| History of Depression                       | 0.5484    | 0.07350        | <.0001  | 0.4044                        | 0.6925                        |
| History of Osteoarthritis                   | 1.3187    | 0.05467        | <.0001  | 1.2115                        | 1.4259                        |
| Charlson Comorbidity Score                  | 0.06712   | 0.01268        | <.0001  | 0.04227                       | 0.09197                       |
| Clinic Visits                               | -0.00069  | 0.004383       | 0.8750  | -0.00928                      | 0.007900                      |
| Clinic Connectedness                        |           |                |         |                               |                               |
| Connected to specific physician             | 0.3185    | 0.05024        | <.0001  | 0.2200                        | 0.4170                        |
| Connected to specific practice              | reference | n/a            | n/a     | n/a                           | n/a.                          |
| Lives in Urban Area                         | 0.2529    | 0.1588         | 0.1113  | -0.05838                      | 0.5642                        |
| Lives in Area with Low Physical Food Access | 0.1009    | 0.07792        | 0.1955  | -0.05185                      | 0.2536                        |
| Percentage of Area Living in Group Quarters | -0.00020  | 0.000060       | 0.0009  | -0.00032                      | -0.00008                      |
| Lives in Area with Low Vehicle Access       | 0.1176    | 0.05585        | 0.0352  | 0.008130                      | 0.2271                        |
| ZIP-level Unemployment Rate                 | 0.2684    | 0.03881        | <.0001  | 0.1921                        | 0.3447                        |
| ZIP-level Median Household Income           | -0.00001  | 1.972E-6       | <.0001  | -0.00002                      | -8.48E-6                      |
| ZIP-level Poverty Rate                      | -0.03270  | 0.01396        | 0.0199  | -0.06020                      | -0.00521                      |
| ZIP-level Segregation                       | 0.003113  | 0.003967       | 0.4332  | -0.00470                      | 0.01092                       |

eTable 11: Full models for association between ZIP-level housing resources and systolic blood pressure

|                                   | Estimate  | Standard Error | p-value | Lower 95% Confidence Interval | Upper 95% Confidence Interval |
|-----------------------------------|-----------|----------------|---------|-------------------------------|-------------------------------|
| Intercept                         | 115.70    | 11.1188        | <.0001  | 93.9116                       | 137.50                        |
| ZIP-level housing resources       | -0.04612  | 0.05585        | 0.4106  | -0.1567                       | 0.06446                       |
| ZIP-level afterschool resources   | -0.03286  | 0.04586        | 0.4755  | -0.1240                       | 0.05828                       |
| Age, years                        | 0.1521    | 0.009429       | <.0001  | 0.1337                        | 0.1706                        |
| Female                            | -0.6839   | 0.1930         | 0.0004  | -1.0622                       | -0.3055                       |
| Race/ethnicity                    |           |                |         |                               |                               |
| Asian/Multi/Other                 | -1.2014   | 0.4952         | 0.0153  | -2.1720                       | -0.2308                       |
| Non-Hispanic Black                | 2.8013    | 0.3960         | <.0001  | 2.0251                        | 3.5774                        |
| Hispanic                          | 0.5064    | 0.5619         | 0.3675  | -0.5950                       | 1.6078                        |
| Non-Hispanic White                | reference | n/a            | n/a     | n/a                           | n/a.                          |
| Education                         |           |                |         |                               |                               |
| College or >                      | 0.02428   | 0.3181         | 0.9392  | -0.5992                       | 0.6478                        |
| High School Diploma               | 0.1732    | 0.3236         | 0.5924  | -0.4610                       | 0.8074                        |
| Less than High School Diploma     | 0.6220    | 0.3914         | 0.1121  | -0.1452                       | 1.3893                        |
| Unknown/Declined                  | reference | n/a            | n/a     | n/a                           | n/a.                          |
| Insurance                         |           |                |         |                               |                               |
| Private                           | 8.3527    | 10.9765        | 0.4467  | -13.1616                      | 29.8671                       |
| Medicare and Medicaid             | 7.8728    | 10.9784        | 0.4733  | -13.6453                      | 29.3910                       |
| Medicaid                          | 8.5660    | 10.9772        | 0.4352  | -12.9499                      | 30.0818                       |
| Medicaid                          | 8.4728    | 10.9781        | 0.4402  | -13.0447                      | 29.9903                       |
| Self-pay                          | reference | n/a            | n/a     | n/a                           | n/a.                          |
| English is Primary Language       | -0.01463  | 0.4091         | 0.9715  | -0.8165                       | 0.7873                        |
| History of Coronary Heart Disease | -2.7190   | 0.2620         | <.0001  | -3.2325                       | -2.2055                       |
| History of Diabetes Mellitus      | 0.1079    | 0.2325         | 0.6426  | -0.3478                       | 0.5635                        |
| History of Depression             | -0.9568   | 0.3076         | 0.0019  | -1.5596                       | -0.3539                       |

eTable 11: Full models for association between ZIP-level housing resources and systolic blood pressure

|                                             | Estimate  | Standard Error | p-value | Lower 95% Confidence Interval | Upper 95% Confidence Interval |
|---------------------------------------------|-----------|----------------|---------|-------------------------------|-------------------------------|
| History of Osteoarthritis                   | -0.5000   | 0.2009         | 0.0128  | -0.8939                       | -0.1062                       |
| Charlson Comorbidity Score                  | -0.05959  | 0.04502        | 0.1856  | -0.1478                       | 0.02865                       |
| Clinic Visits                               | -0.02840  | 0.01601        | 0.0760  | -0.05978                      | 0.002975                      |
| Clinic Connectedness                        |           |                |         |                               |                               |
| Connected to specific physician             | -1.9594   | 0.2580         | <.0001  | -2.4651                       | -1.4538                       |
| Connected to specific practice              | reference | n/a            | n/a     | n/a                           | n/a.                          |
| Lives in Urban Area                         | 0.2234    | 0.5896         | 0.7049  | -0.9332                       | 1.3799                        |
| Lives in Area with Low Physical Food Access | -0.6380   | 0.3321         | 0.0548  | -1.2892                       | 0.01327                       |
| Percentage of Area Living in Group Quarters | -0.00025  | 0.000262       | 0.3352  | -0.00077                      | 0.000261                      |
| Lives in Area with Low Vehicle Access       | 0.2689    | 0.2251         | 0.2324  | -0.1725                       | 0.7102                        |
| ZIP-level Unemployment Rate                 | 0.1919    | 0.1055         | 0.0702  | -0.01598                      | 0.3998                        |
| ZIP-level Median Household Income           | 5.33E-7   | 4.993E-6       | 0.9151  | -9.33E-6                      | 0.000010                      |
| ZIP-level Poverty Rate                      | 0.003603  | 0.03442        | 0.9168  | -0.06460                      | 0.07180                       |
| ZIP-level Segregation                       | -0.00127  | 0.01007        | 0.8999  | -0.02117                      | 0.01863                       |



eTable 12: Full models for association between ZIP-level nutrition resources and systolic blood pressure

|                                   | Estimate  | Standard Error | p-value | Lower 95% Confidence Interval | Upper 95% Confidence Interval |
|-----------------------------------|-----------|----------------|---------|-------------------------------|-------------------------------|
| Intercept                         | 115.52    | 11.1170        | <.0001  | 93.7336                       | 137.31                        |
| ZIP-level nutrition resources     | 0.01167   | 0.07270        | 0.8728  | -0.1325                       | 0.1559                        |
| ZIP-level afterschool resources   | -0.06660  | 0.05852        | 0.2582  | -0.1829                       | 0.04971                       |
| Age, years                        | 0.1522    | 0.009429       | <.0001  | 0.1337                        | 0.1707                        |
| Female                            | -0.6823   | 0.1930         | 0.0004  | -1.0606                       | -0.3039                       |
| Race/ethnicity                    |           |                |         |                               |                               |
| Asian/Multi/Other                 | -1.2077   | 0.4952         | 0.0147  | -2.1782                       | -0.2371                       |
| Non-Hispanic Black                | 2.7981    | 0.3960         | <.0001  | 2.0218                        | 3.5744                        |
| Hispanic                          | 0.5101    | 0.5622         | 0.3643  | -0.5919                       | 1.6120                        |
| Non-Hispanic White                | reference | n/a            | n/a     | n/a                           | n/a.                          |
| education                         |           |                |         |                               |                               |
| College or >                      | 0.01868   | 0.3181         | 0.9532  | -0.6048                       | 0.6421                        |
| High School Diploma               | 0.1716    | 0.3236         | 0.5958  | -0.4626                       | 0.8059                        |
| Less than High School Diploma     | 0.6218    | 0.3915         | 0.1122  | -0.1455                       | 1.3891                        |
| Unknown/Declined                  | reference | n/a            | n/a     | n/a                           | n/a.                          |
| Insurance                         |           |                |         |                               |                               |
| Private                           | 8.3894    | 10.9765        | 0.4447  | -13.1251                      | 29.9038                       |
| Medicare and Medicaid             | 7.9053    | 10.9784        | 0.4715  | -13.6130                      | 29.4235                       |
| Medicaid                          | 8.6004    | 10.9773        | 0.4334  | -12.9155                      | 30.1163                       |
| Medicaid                          | 8.5087    | 10.9781        | 0.4383  | -13.0089                      | 30.0263                       |
| Self-pay                          | reference | n/a            | n/a     | n/a                           | n/a.                          |
| English is Primary Language       | -0.01592  | 0.4094         | 0.9690  | -0.8183                       | 0.7865                        |
| History of Coronary Heart Disease | -2.7161   | 0.2620         | <.0001  | -3.2295                       | -2.2026                       |
| History of Diabetes Mellitus      | 0.1087    | 0.2325         | 0.6399  | -0.3469                       | 0.5644                        |
| History of Depression             | -0.9576   | 0.3076         | 0.0019  | -1.5605                       | -0.3547                       |

eTable 12: Full models for association between ZIP-level nutrition resources and systolic blood pressure

|                                             | Estimate  | Standard Error | p-value | Lower 95% Confidence Interval | Upper 95% Confidence Interval |
|---------------------------------------------|-----------|----------------|---------|-------------------------------|-------------------------------|
| History of Osteoarthritis                   | -0.5002   | 0.2009         | 0.0128  | -0.8940                       | -0.1063                       |
| Charlson Comorbidity Score                  | -0.05975  | 0.04502        | 0.1845  | -0.1480                       | 0.02849                       |
| Clinic Visits                               | -0.02845  | 0.01601        | 0.0756  | -0.05982                      | 0.002932                      |
| Clinic Connectedness                        |           |                |         |                               |                               |
| Connected to specific physician             | -1.9589   | 0.2580         | <.0001  | -2.4645                       | -1.4532                       |
| Connected to specific practice              | reference | n/a            | n/a     | n/a                           | n/a.                          |
| Lives in Urban Area                         | 0.1603    | 0.5860         | 0.7845  | -0.9893                       | 1.3098                        |
| Lives in Area with Low Physical Food Access | -0.5789   | 0.3269         | 0.0768  | -1.2201                       | 0.06231                       |
| Percentage of Area Living in Group Quarters | -0.00025  | 0.000262       | 0.3343  | -0.00077                      | 0.000261                      |
| Lives in Area with Low Vehicle Access       | 0.2662    | 0.2251         | 0.2371  | -0.1752                       | 0.7076                        |
| ZIP-level Unemployment Rate                 | 0.2065    | 0.1045         | 0.0493  | 0.000612                      | 0.4124                        |
| ZIP-level Median Household Income           | 1.008E-6  | 4.966E-6       | 0.8395  | -8.8E-6                       | 0.000011                      |
| ZIP-level Poverty Rate                      | 0.003660  | 0.03453        | 0.9158  | -0.06473                      | 0.07205                       |
| ZIP-level Segregation                       | -0.00086  | 0.01007        | 0.9325  | -0.02075                      | 0.01904                       |

eTable 13: Full models for association between ZIP-level nutrition resources and low density lipoprotein cholesterol

|                                   | Estimate  | Standard Error | p-value | Lower 95% Confidence Interval | Upper 95% Confidence Interval |
|-----------------------------------|-----------|----------------|---------|-------------------------------|-------------------------------|
| Intercept                         | 103.76    | 38.1863        | 0.0066  | 28.9153                       | 178.61                        |
| ZIP-level nutrition resources     | 0.09859   | 0.2309         | 0.6699  | -0.3573                       | 0.5545                        |
| ZIP-level afterschool resources   | -0.00381  | 0.1854         | 0.9837  | -0.3706                       | 0.3630                        |
| Age, years                        | -0.3600   | 0.03023        | <.0001  | -0.4193                       | -0.3008                       |
| Female                            | 11.7432   | 0.5645         | <.0001  | 10.6367                       | 12.8497                       |
| Race/ethnicity                    | 0         | .              | .       | .                             | .                             |
| Asian/Multi/Other                 | -2.6927   | 1.4423         | 0.0619  | -5.5197                       | 0.1343                        |
| Non-Hispanic Black                | 0.7350    | 1.2077         | 0.5428  | -1.6323                       | 3.1022                        |
| Hispanic                          | 0.3468    | 1.7794         | 0.8455  | -3.1409                       | 3.8345                        |
| Non-Hispanic White                | reference | n/a            | n/a     | n/a                           | n/a.                          |
| Education                         |           |                |         |                               |                               |
| College or >                      | -0.1046   | 0.9328         | 0.9107  | -1.9329                       | 1.7237                        |
| High School Diploma               | -0.2598   | 0.9497         | 0.7844  | -2.1212                       | 1.6016                        |
| Less than High School Diploma     | -0.8496   | 1.1612         | 0.4644  | -3.1256                       | 1.4264                        |
| Unknown/Declined                  | reference | n/a            | n/a     | n/a                           | n/a.                          |
| Insurance                         |           |                |         |                               |                               |
| Private                           | 37.5148   | 37.8147        | 0.3212  | -36.6052                      | 111.63                        |
| Medicare and Medicaid             | 36.1970   | 37.8181        | 0.3385  | -37.9296                      | 110.32                        |
| Medicaid                          | 37.4872   | 37.8163        | 0.3216  | -36.6360                      | 111.61                        |
| Medicaid                          | 35.4040   | 37.8171        | 0.3492  | -38.7206                      | 109.53                        |
| Self-pay                          | reference | n/a            | n/a     | n/a                           | n/a.                          |
| English is Primary Language       | 0.6482    | 1.2438         | 0.6023  | -1.7897                       | 3.0861                        |
| History of Hypertension           | -4.3457   | 1.1538         | 0.0002  | -6.6072                       | -2.0842                       |
| History of Coronary Heart Disease | -14.8429  | 0.7275         | <.0001  | -16.2689                      | -13.4170                      |
| History of Diabetes Mellitus      | -16.1429  | 0.6619         | <.0001  | -17.4404                      | -14.8455                      |

eTable 13: Full models for association between ZIP-level nutrition resources and low density lipoprotein cholesterol

|                                             | Estimate  | Standard Error | p-value | Lower 95% Confidence Interval | Upper 95% Confidence Interval |
|---------------------------------------------|-----------|----------------|---------|-------------------------------|-------------------------------|
| History of Depression                       | 1.0979    | 0.9513         | 0.2485  | -0.7668                       | 2.9626                        |
| History of Osteoarthritis                   | 1.0828    | 0.5853         | 0.0643  | -0.06449                      | 2.2302                        |
| Charlson Comorbidity Score                  | -0.9716   | 0.1366         | <.0001  | -1.2394                       | -0.7038                       |
| Clinic Visits                               | -0.1983   | 0.04901        | <.0001  | -0.2944                       | -0.1023                       |
| Clinic Connectedness                        |           |                |         |                               |                               |
| Connected to specific physician             | -1.4526   | 0.8446         | 0.0855  | -3.1081                       | 0.2029                        |
| Connected to specific practice              | reference | n/a            | n/a     | n/a                           | n/a.                          |
| Lives in Urban Area                         | -0.4909   | 1.7202         | 0.7754  | -3.8649                       | 2.8831                        |
| Lives in Area with Low Physical Food Access | 0.2234    | 1.0117         | 0.8252  | -1.7604                       | 2.2073                        |
| Percentage of Area Living in Group Quarters | 0.001870  | 0.000788       | 0.0177  | 0.000325                      | 0.003414                      |
| Lives in Area with Low Vehicle Access       | -1.1732   | 0.6607         | 0.0759  | -2.4686                       | 0.1222                        |
| ZIP-level Unemployment Rate                 | 0.1519    | 0.3138         | 0.6287  | -0.4659                       | 0.7698                        |
| ZIP-level Median Household Income           | -0.00001  | 0.000015       | 0.3460  | -0.00004                      | 0.000015                      |
| ZIP-level Poverty Rate                      | -0.06528  | 0.1068         | 0.5418  | -0.2760                       | 0.1454                        |
| ZIP-level Segregation                       | -0.00654  | 0.03045        | 0.8301  | -0.06656                      | 0.05347                       |

eTable 14: Full models for association between ZIP-level substance abuse resources and hemoglobin A1c

|                                     | Estimate  | Standard Error | p-value | Lower 95% Confidence Interval | Upper 95% Confidence Interval |
|-------------------------------------|-----------|----------------|---------|-------------------------------|-------------------------------|
| Intercept                           | 7.0576    | 0.3362         | <.0001  | 6.3986                        | 7.7166                        |
| ZIP-level substance abuse resources | -0.00251  | 0.01460        | 0.8634  | -0.03113                      | 0.02611                       |
| ZIP-level afterschool resources     | 0.01106   | 0.007376       | 0.1336  | -0.00339                      | 0.02552                       |
| Age, years                          | -0.01059  | 0.001940       | <.0001  | -0.01440                      | -0.00679                      |
| Female                              | -0.1380   | 0.03843        | 0.0003  | -0.2133                       | -0.06263                      |
| Race/ethnicity                      |           |                |         |                               |                               |
| Asian/Multi/Other                   | -0.08503  | 0.08123        | 0.2952  | -0.2443                       | 0.07420                       |
| Non-Hispanic Black                  | 0.07012   | 0.06209        | 0.2588  | -0.05160                      | 0.1918                        |
| Hispanic                            | 0.06593   | 0.08944        | 0.4611  | -0.1094                       | 0.2413                        |
| Non-Hispanic White                  | reference | n/a            | n/a     | n/a                           | n/a.                          |
| Education                           |           |                |         |                               |                               |
| College or >                        | -0.1646   | 0.06820        | 0.0158  | -0.2983                       | -0.03090                      |
| High School Diploma                 | -0.01912  | 0.06665        | 0.7742  | -0.1498                       | 0.1116                        |
| Less than High School Diploma       | -0.07235  | 0.07528        | 0.3366  | -0.2200                       | 0.07529                       |
| Unknown/Declined                    | reference | n/a            | n/a     | n/a                           | n/a.                          |
| Insurance                           |           |                |         |                               |                               |
| Private                             | 0.2134    | 0.05612        | 0.0001  | 0.1034                        | 0.3234                        |
| Medicare and Medicaid               | 0.03459   | 0.05765        | 0.5486  | -0.07842                      | 0.1476                        |
| Medicaid                            | 0.3912    | 0.06811        | <.0001  | 0.2577                        | 0.5247                        |
| Medicaid                            | reference | n/a            | n/a     | n/a                           | n/a.                          |
| English is Primary Language         | -0.1599   | 0.06505        | 0.0140  | -0.2874                       | -0.03232                      |
| History of Hypertension             | 0.2365    | 0.05985        | <.0001  | 0.1191                        | 0.3538                        |
| History of Coronary Heart Disease   | -0.03921  | 0.04940        | 0.4274  | -0.1361                       | 0.05764                       |

eTable 14: Full models for association between ZIP-level substance abuse resources and hemoglobin A1c

|                                             | Estimate  | Standard Error     | p-value            | Lower 95% Confidence Interval | Upper 95% Confidence Interval |
|---------------------------------------------|-----------|--------------------|--------------------|-------------------------------|-------------------------------|
| History of Depression                       | -0.03705  | 0.05766            | 0.5205             | -0.1501                       | 0.07598                       |
| History of Osteoarthritis                   | -0.1499   | 0.04010            | 0.0002             | -0.2285                       | -0.07134                      |
| Charlson Comorbidity Score                  | 0.01588   | 0.008146           | 0.0513             | -0.00009                      | 0.03185                       |
| Clinic Visits                               | 0.006502  | 0.002846           | 0.0224             | 0.000922                      | 0.01208                       |
| Clinic Connectedness                        |           |                    |                    |                               |                               |
| Connected to specific physician             | -0.08553  | 0.05430            | 0.1153             | -0.1920                       | 0.02092                       |
| Connected to specific practice              | reference | n/a                | n/a                | n/a                           | n/a.                          |
| Lives in Urban Area                         | 0.3470    | 0.1270             | 0.0063             | 0.09804                       | 0.5959                        |
| Lives in Area with Low Physical Food Access | -0.07748  | 0.06097            | 0.2039             | -0.1970                       | 0.04205                       |
| Percentage of Area Living in Group Quarters | -0.00001  | 0.000060           | 0.8418             | -0.00013                      | 0.000106                      |
| Lives in Area with Low Vehicle Access       | 0.04455   | 0.04429            | 0.3145             | -0.04228                      | 0.1314                        |
| ZIP-level Unemployment Rate                 | 0.03710   | 0.01932            | 0.0549             | -0.00078                      | 0.07499                       |
| ZIP-level Median Household Income           | 1.636E-6  | Unable to estimate | Unable to estimate | Unable to estimate            | Unable to estimate            |
| ZIP-level Poverty Rate                      | -0.00359  | 0.005890           | 0.5418             | -0.01514                      | 0.007953                      |
| ZIP-level Segregation                       | -0.00001  | 0.001802           | 0.9950             | -0.00354                      | 0.003522                      |

eTable 15: Full models for association between ZIP-level mental health resources and hemoglobin A1c

|                                   | Estimate  | Standard Error | p-value | Lower 95% Confidence Interval | Upper 95% Confidence Interval |
|-----------------------------------|-----------|----------------|---------|-------------------------------|-------------------------------|
| Intercept                         | 7.0641    | 0.3371         | <.0001  | 6.4033                        | 7.7250                        |
| ZIP-level mental health resources | -0.00348  | 0.01130        | 0.7582  | -0.02564                      | 0.01868                       |
| ZIP-level afterschool resources   | 0.01159   | 0.006992       | 0.0974  | -0.00212                      | 0.02530                       |
| Age, years                        | -0.01058  | 0.001940       | <.0001  | -0.01438                      | -0.00678                      |
| Female                            | -0.1382   | 0.03843        | 0.0003  | -0.2135                       | -0.06283                      |
| Race/ethnicity                    |           |                |         |                               |                               |
| Asian/Multi/Other                 | -0.08415  | 0.08130        | 0.3007  | -0.2435                       | 0.07522                       |
| Non-Hispanic Black                | 0.07084   | 0.06217        | 0.2545  | -0.05103                      | 0.1927                        |
| Hispanic                          | 0.06543   | 0.08946        | 0.4646  | -0.1099                       | 0.2408                        |
| Non-Hispanic White                | reference | n/a            | n/a     | n/a                           | n/a.                          |
| Education                         |           |                |         |                               |                               |
| College or >                      | -0.1647   | 0.06820        | 0.0158  | -0.2984                       | -0.03095                      |
| High School Diploma               | -0.01936  | 0.06665        | 0.7715  | -0.1500                       | 0.1113                        |
| Less than High School Diploma     | -0.07325  | 0.07536        | 0.3312  | -0.2210                       | 0.07454                       |
| Unknown/Declined                  | reference | n/a            | n/a     | n/a                           | n/a.                          |
| Insurance                         |           |                |         |                               |                               |
| Private                           | 0.2135    | 0.05612        | 0.0001  | 0.1035                        | 0.3235                        |
| Medicare and Medicaid             | 0.03499   | 0.05767        | 0.5440  | -0.07805                      | 0.1480                        |
| Medicaid                          | 0.3913    | 0.06810        | <.0001  | 0.2578                        | 0.5248                        |
| Medicaid                          | reference | n/a            | n/a     | n/a                           | n/a.                          |
| English is Primary Language       | -0.1597   | 0.06502        | 0.0141  | -0.2871                       | -0.03218                      |
| History of Hypertension           | 0.2365    | 0.05985        | <.0001  | 0.1191                        | 0.3538                        |
| History of Coronary Heart Disease | -0.03931  | 0.04940        | 0.4262  | -0.1362                       | 0.05753                       |
| History of Depression             | -0.03699  | 0.05766        | 0.5212  | -0.1500                       | 0.07604                       |

eTable 15: Full models for association between ZIP-level mental health resources and hemoglobin A1c

|                                             | Estimate  | Standard Error     | p-value            | Lower 95% Confidence Interval | Upper 95% Confidence Interval |
|---------------------------------------------|-----------|--------------------|--------------------|-------------------------------|-------------------------------|
| History of Osteoarthritis                   | -0.1498   | 0.04009            | 0.0002             | -0.2284                       | -0.07123                      |
| Charlson Comorbidity Score                  | 0.01585   | 0.008146           | 0.0518             | -0.00012                      | 0.03182                       |
| Clinic Visits                               | 0.006518  | 0.002846           | 0.0220             | 0.000939                      | 0.01210                       |
| Clinic Connectedness                        |           |                    |                    |                               |                               |
| Connected to specific physician             | -0.08559  | 0.05429            | 0.1150             | -0.1920                       | 0.02085                       |
| Connected to specific practice              | reference | n/a                | n/a                | n/a                           | n/a.                          |
| Lives in Urban Area                         | 0.3477    | 0.1268             | 0.0061             | 0.09914                       | 0.5962                        |
| Lives in Area with Low Physical Food Access | -0.07867  | 0.06091            | 0.1966             | -0.1981                       | 0.04074                       |
| Percentage of Area Living in Group Quarters | -0.00001  | 0.000060           | 0.8517             | -0.00013                      | 0.000107                      |
| Lives in Area with Low Vehicle Access       | 0.04534   | 0.04440            | 0.3072             | -0.04169                      | 0.1324                        |
| ZIP-level Unemployment Rate                 | 0.03660   | 0.01940            | 0.0592             | -0.00143                      | 0.07462                       |
| ZIP-level Median Household Income           | 1.599E-6  | Unable to estimate | Unable to estimate | Unable to estimate            | Unable to estimate            |
| ZIP-level Poverty Rate                      | -0.00359  | 0.005889           | 0.5423             | -0.01513                      | 0.007956                      |
| ZIP-level Segregation                       | -0.00002  | 0.001802           | 0.9931             | -0.00355                      | 0.003517                      |

eTable 16: Full models for association between ZIP-level food resources and systolic blood pressure in those without hypertension

|                                 | Estimate | Standard Error | p-value | Lower 95% Confidence Interval | Upper 95% Confidence Interval |
|---------------------------------|----------|----------------|---------|-------------------------------|-------------------------------|
| Intercept                       | 118.75   | 2.4411         | <.0001  | 113.96                        | 123.54                        |
| ZIP-level food resources        | -0.08047 | 0.03550        | 0.0262  | -0.1511                       | -0.00980                      |
| ZIP-level afterschool resources | 0.06047  | 0.03336        | 0.0730  | -0.00574                      | 0.1267                        |



eTable 16: Full models for association between ZIP-level food resources and systolic blood pressure in those without hypertension

|                                 | Estimate  | Standard Error | p-value | Lower 95% Confidence Interval | Upper 95% Confidence Interval |
|---------------------------------|-----------|----------------|---------|-------------------------------|-------------------------------|
| Age, years                      | 0.1657    | 0.005420       | <.0001  | 0.1550                        | 0.1763                        |
| Female                          | -5.2802   | 0.1186         | <.0001  | -5.5126                       | -5.0477                       |
| Race/ethnicity                  |           |                |         |                               |                               |
| Asian/Multi/Other               | -2.6721   | 0.2363         | <.0001  | -3.1353                       | -2.2089                       |
| Non-Hispanic Black              | 0.6111    | 0.2706         | 0.0239  | 0.08082                       | 1.1415                        |
| Hispanic                        | -0.7475   | 0.2728         | 0.0061  | -1.2822                       | -0.2129                       |
| Non-Hispanic White              | reference | n/a            | n/a     | n/a                           | n/a.                          |
| Education                       |           |                |         |                               |                               |
| College or >                    | -0.02240  | 0.1940         | 0.9080  | -0.4026                       | 0.3577                        |
| High School Diploma             | 0.4658    | 0.2125         | 0.0284  | 0.04932                       | 0.8823                        |
| Less than High School Diploma   | 0.9903    | 0.2550         | 0.0001  | 0.4905                        | 1.4901                        |
| Unknown/Declined                | reference | n/a            | n/a     | n/a                           | n/a.                          |
| Insurance                       |           |                |         |                               |                               |
| Private                         | -4.3672   | 2.1456         | 0.0418  | -8.5725                       | -0.1618                       |
| Medicare and Medicaid           | -4.2024   | 2.1674         | 0.0525  | -8.4505                       | 0.04573                       |
| Medicaid                        | -4.6349   | 2.1479         | 0.0309  | -8.8449                       | -0.4248                       |
| Medicaid                        | -2.2777   | 2.1596         | 0.2916  | -6.5105                       | 1.9551                        |
| Self-pay                        | reference | n/a            | n/a     | n/a                           | n/a.                          |
| English is Primary Language     | 0.9827    | 0.2700         | 0.0003  | 0.4536                        | 1.5119                        |
| History of Depression           | -0.1126   | 0.2130         | 0.5970  | -0.5301                       | 0.3048                        |
| History of Osteoarthritis       | 0.5132    | 0.1754         | 0.0034  | 0.1695                        | 0.8570                        |
| Charlson Comorbidity Score      | 0.1840    | 0.04369        | <.0001  | 0.09834                       | 0.2696                        |
| Clinic Visits                   | -0.05715  | 0.01445        | <.0001  | -0.08548                      | -0.02882                      |
| Clinic Connectedness            |           |                |         |                               |                               |
| Connected to specific physician | -0.6938   | 0.1282         | <.0001  | -0.9450                       | -0.4425                       |

eTable 16: Full models for association between ZIP-level food resources and systolic blood pressure in those without hypertension

|                                             | Estimate  | Standard Error | p-value | Lower 95% Confidence Interval | Upper 95% Confidence Interval |
|---------------------------------------------|-----------|----------------|---------|-------------------------------|-------------------------------|
| Connected to specific practice              | reference | n/a            | n/a     | n/a                           | n/a.                          |
| Lives in Urban Area                         | -0.4004   | 0.3700         | 0.2793  | -1.1261                       | 0.3254                        |
| Lives in Area with Low Physical Food Access | 0.2289    | 0.1896         | 0.2274  | -0.1429                       | 0.6006                        |
| Percentage of Area Living in Group Quarters | -0.00031  | 0.000146       | 0.0348  | -0.00060                      | -0.00002                      |
| Lives in Area with Low Vehicle Access       | -0.00646  | 0.1455         | 0.9646  | -0.2917                       | 0.2788                        |
| ZIP-level Unemployment Rate                 | 0.2795    | 0.07224        | 0.0001  | 0.1373                        | 0.4218                        |
| ZIP-level Median Household Income           | -0.00002  | 3.286E-6       | <.0001  | -0.00002                      | -9.76E-6                      |
| ZIP-level Poverty Rate                      | -0.02364  | 0.02254        | 0.2968  | -0.06835                      | 0.02108                       |
| ZIP-level Segregation                       | 0.01658   | 0.006771       | 0.0154  | 0.003208                      | 0.02995                       |
